# Supplementary material
Source: HighWire-hosted journal article supplement (https://erj.ersjournals.com/content/57/2/2001272)
Supplement: inline-supplementary-material-1 [file inline-supplementary-material-1.pdf]

**Electronic Supplement:**  
**European Respiratory Society Statement on Sleep Apnoea,**  
**Sleepiness and Driving Risk**

Bonsignore MR, Randerath W, Schiza S, Verbraecken J, Elliott MW, Riha R, Barbe F, Bouloukaki I, Castrogiovanni A, Deleanu O, Goncalves M, Leger D, Marrone O, Penzel T, Ryan S, Smyth D, Teran-Santos J, Turino C, McNicholas WT.

## **Literature Search Criteria and Details of Report Selection for each Section**

### **1) Epidemiology**

#### **Results of the literature search**

A search on PubMed using the terms: "sleep apnea" AND epidemiology AND driving retrieved 166 references. Fifteen additional records were identified, for a total of 181 references. The flow chart in Figure e1 reports the process leading to the identification of 45 papers included for qualitative synthesis. Three papers were meta-analyses, 17 papers reported the results of questionnaire-based studies in non-commercial (n=6) and commercial drivers (n=11), and 25 papers reported the results of sleep study-based investigations.

### **2) Predictors of sleepiness in OSA**

#### **Results of the literature search**

The search criteria for predictors of sleepiness in OSA and obese patients are reported below. The final selection for analysis included 42 papers for sleepiness in OSA (**Table 4, e-supplement**) and 12 papers for sleepiness in obesity (**Table 5, e-supplement**).

#### **Search terms:**

Hypoxia and sleepiness, hypoxemia and sleepiness, polysomnography in OSA, polysomnography and excessive daytime sleepiness, factors of excessive daytime sleepiness in obstructive sleep apnoea, Predictor of daytime sleepiness in OSA, daytime sleepiness in OSA, sleep disruption in OSA, sleep fragmentation and excessive daytime sleepiness in obstructive sleep apnoea, sleepiness in OSA, nocturnal hypoxemia and sleepiness. Daytime sleepiness in obese, obesity and OSA, obesity and sleep relating breathing, obesity, predictors of sleepiness in obesity, sleepiness in severe obese.

**Hypoxia and sleepiness and OSA:** ("hypoxia"[MeSH Terms] OR "hypoxia"[All Fields]) AND ("sleep stages"[MeSH Terms] OR ("sleep"[All Fields] AND "stages"[All Fields]) OR "sleep stages"[All Fields] OR "sleepiness"[All Fields]) AND OSA[All Fields]: 112 results: after exclusion of not pertinent references (post-treatment changes, reviews, other diseases, experimental studies in animals): **5 references**

**Polysomnography and sleepiness and OSA and adults** ("polysomnography"[MeSH Terms] OR "polysomnography"[All Fields]) AND ("sleep stages"[MeSH Terms] OR ("sleep"[All Fields] AND "stages"[All Fields]) OR "sleep stages"[All Fields] OR "sleepiness"[All Fields]) AND OSA[All Fields]AND ("adult"[MeSH Terms] OR "adult"[All Fields]): 896 results; **37 references selected, total:42 references (Table 6, e-supplement)**

**Obesity and sleepiness** ("obesity"[MeSH Terms] OR "obesity"[All Fields]) AND ("sleep stages"[MeSH Terms] OR ("sleep"[All Fields] AND "stages"[All Fields]) OR "sleep stages"[All Fields] OR "sleepiness"[All Fields]AND ("adult"[MeSH Terms] OR "adult"[All Fields] OR "adults"[All Fields])

### **3) Questionnaires as screening tools for OSA in drivers**

#### **Results of the literature search**

Database individually searched: PubMed.Keyword combinations: “Sleep apnoea” AND “screening”; “Sleep apnoea” AND “Epworth Sleepiness Scale”; “Sleep apnoea” AND “Berlin Questionnaire”; “Sleep apnoea” AND “STOP-Bang”; “Sleep apnoea” AND “drivers”; “Sleep apnoea” AND “driving”. Only papers that validated the questionnaires versus P(S)G were considered. We excluded papers on OSA screening in surgical patients or pregnancy.

### **4)Evaluation of Sleepiness**

#### **Results of the literature search**

The search terms: “MSLT and sleep apnea and driving” retrieved 13 references (included n=8); “MWT and driving” retrieved 25 references (included n=12); “Sleep apnea and OSLE” retrieved 12 refs (5 included); “Sleep apnea and DADT” retrieved 14 refs (5 included). Some papers examined more than one test, often in association with driving simulation (see next section).

### **5) Driving Simulators in the Evaluation of Fitness to Drive**

#### **Results of the literature search**

A PubMed search by using the following terms: "driving simulator"[All Fields] AND "sleep apnea"[All Fields] and papers were selected as depicted in **Figure e2**. Papers were selected and examined according to the subjects in which the assessment was obtained, i.e., normal subjects (n=5 studies), and untreated OSA patients (n=32) (**Table 7, e-supplement**). **Table8,**

**e-supplement** summarises 12 studies on driving performance before and after CPAP treatment.

## **6) Effectiveness of continuous positive airway pressure (CPAP) treatment in obstructive sleep apnoea (OSA) among commercial and non-commercial motor vehicle drivers**

### **Results of the literature search**

The selection process is indicated in Figure e3. We used keywords “CPAP” and “DRIVERS”. Then words “accidents,” “collisions,” “quality of life”, “cognitive impairment”, “vigilance”, “fatigue”, “drowsiness” and “depression” were added. Main inclusion criteria were: articles published in English; data on human subjects; no reviews, guidelines or case reports; at least three subjects included; and cardiorespiratory monitoring or polysomnography (PSG) available. From 200 articles considered relevant, 34 were included (**Table 10, e-supplement**) and a further meta-analysis of CPAP efficacy in OSA is given in **Table 9, e-supplement**.

**Legend to Figure e1.**

Flow chart of selection process for epidemiological studies included in report.

**Figure e1.**

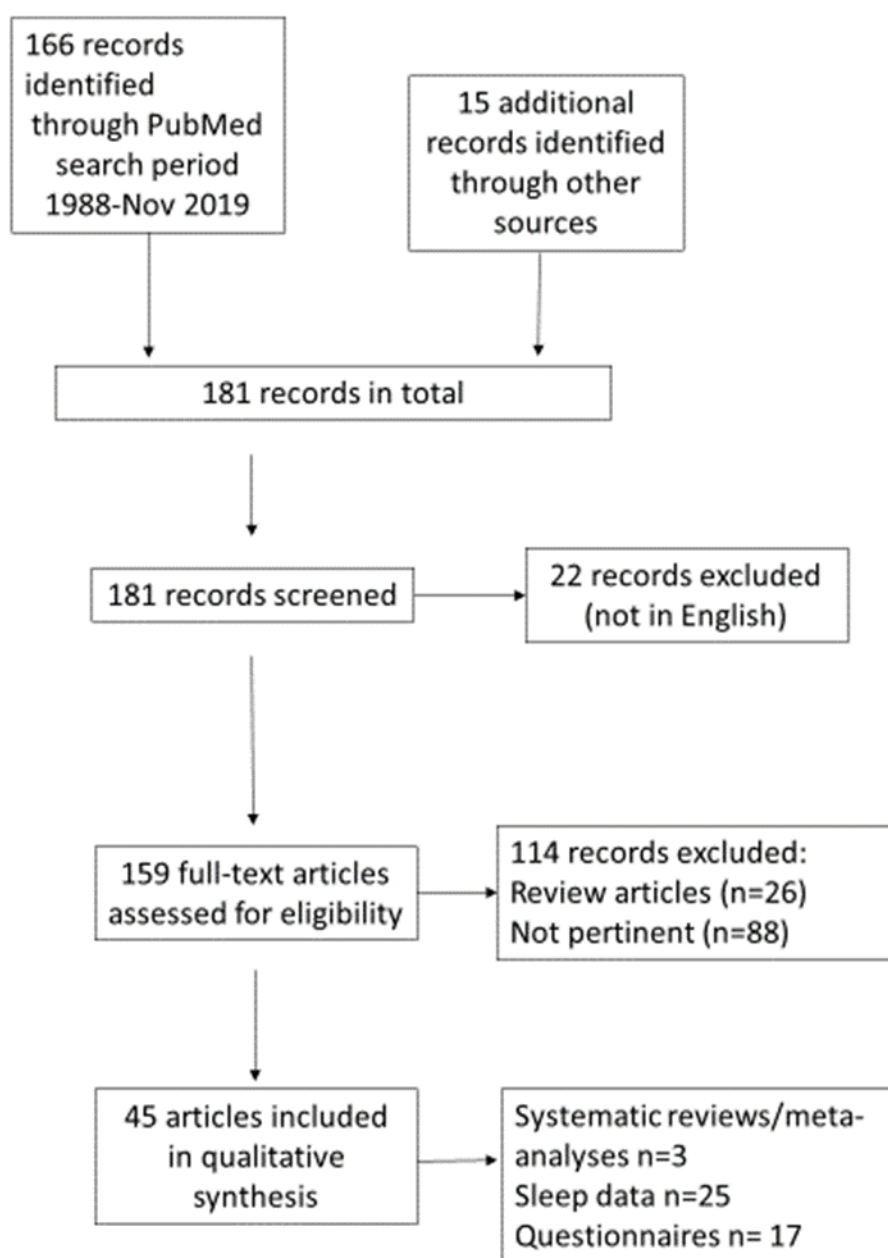

**Legend to Figure e2.**

Flow chart of selection process for driving simulation studies included in report

**Figure e2.**

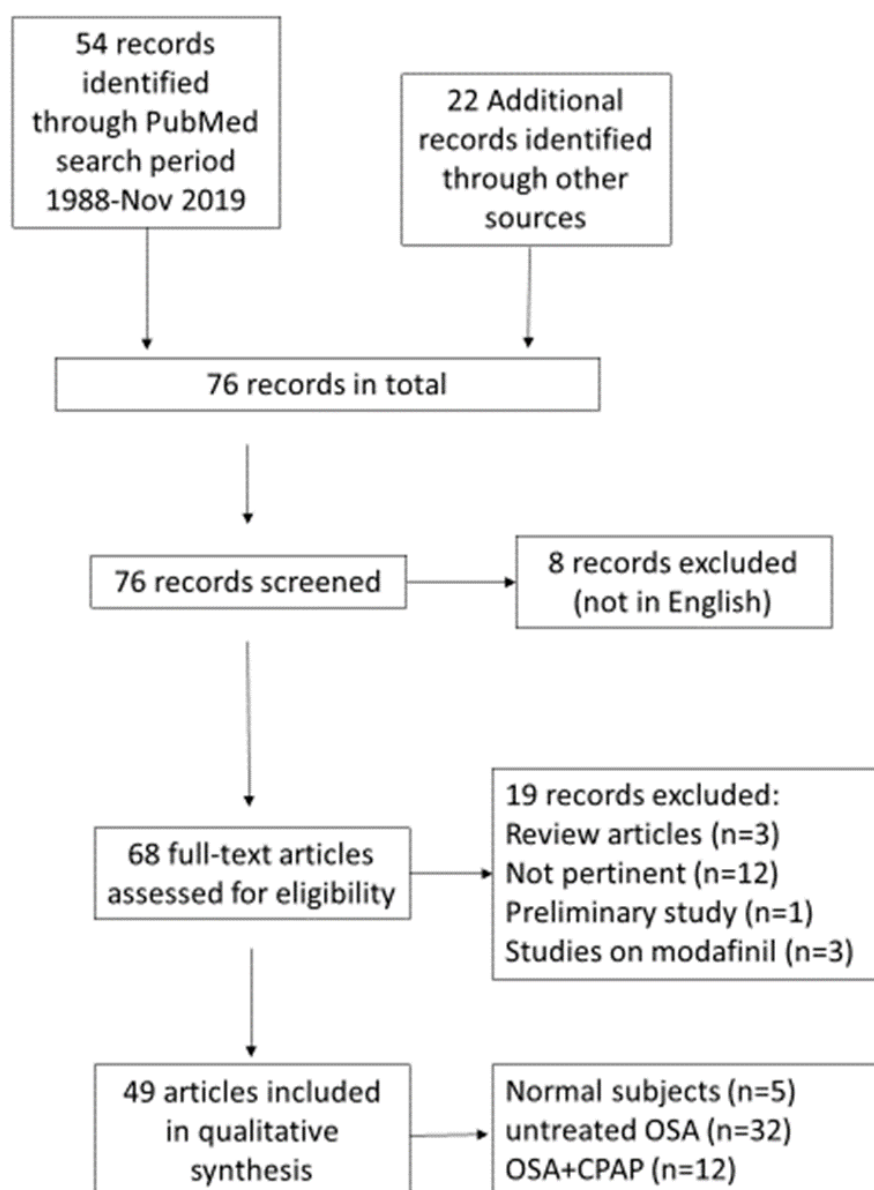

**Legend to Figure e3.**

Flow chart of selection process for CPAP efficacy studies included in report

**Figure e3.**

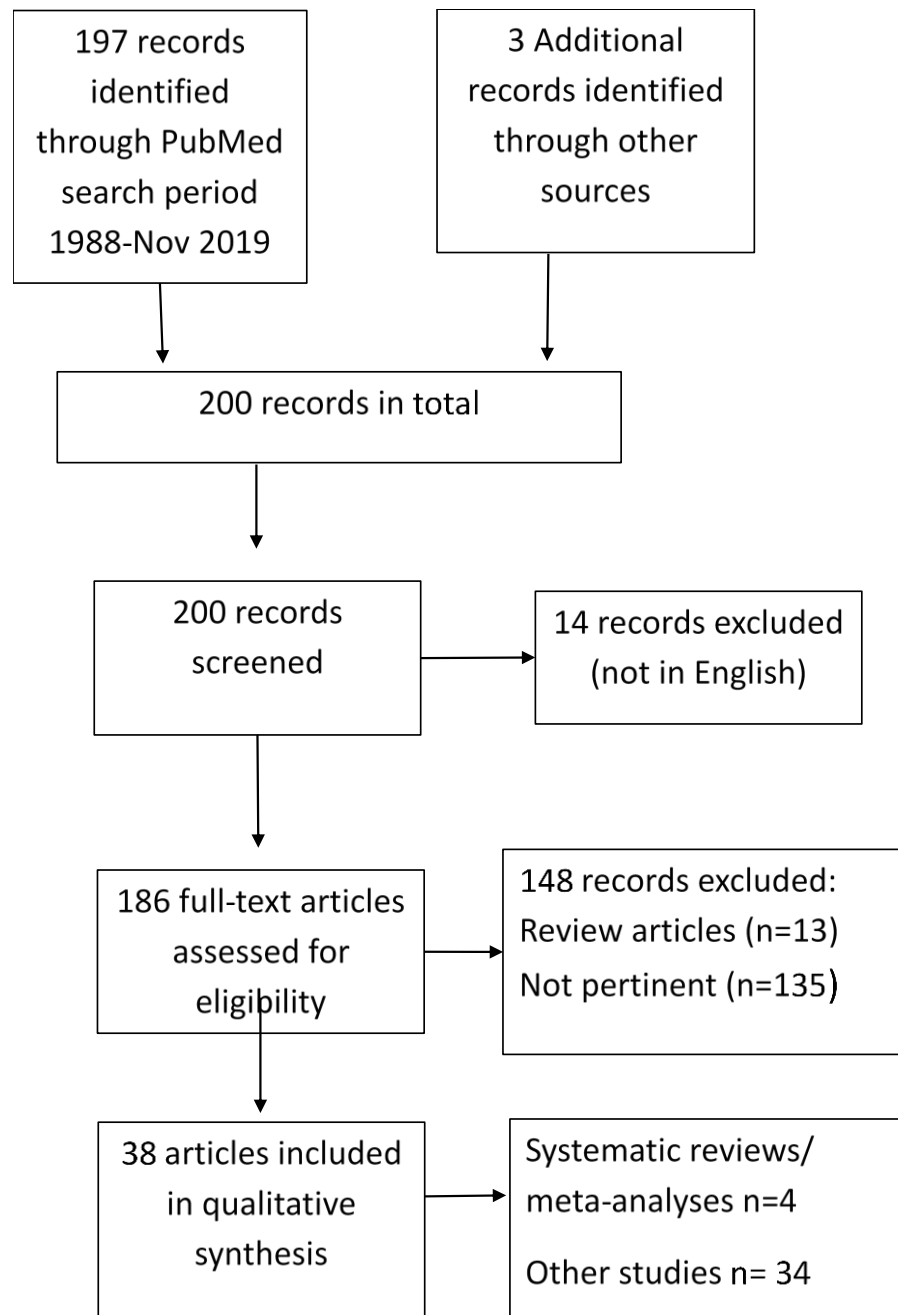

## **Description of the tests of vigilance**

### **Psychomotor vigilance test (PVT)**

The PVT is a high signal-load reaction-time test that is extremely sensitive to sleep deprivation [Lim] and has been shown to be associated with the following findings: a) an overall slowing of response, b) increased propensity to lapse for lengthy periods (<500msec) and incur errors of commission, c) the enhancement of time-on-task effect within each test d) revealing the interaction of circadian and homeostatic sleep drives [Lim]. No absolute parameters have been derived which can be utilised in a predictive manner to assess ability to drive safely.

### **Divided Attention Driving Task (DADT)**

Divided attention can be assessed when performing two tasks simultaneously, such as a primary tracking task and a secondary visual search task. The DADT [George] measures mean tracking error at 10 minutes and 20 minutes.

### **Sustained Attention to Response Task (SART)**

The SART is a go/no-go task which was designed to assess the ability to sustain attention, an important correlate of wakefulness [van der Heide]. The no-go target appears on a screen unpredictably and rarely. Accuracy and response speed (reaction time) are measured. In contrast to vigilance tasks which require observers to respond to critical signals and to withhold responding to neutral events, the SART features the opposite response requirements, supposedly promoting a mindless, non-thoughtful approach to the vigilance task [Dillard].

### **Oxford Sleep Resistance Test (OSLER)**

The OSLER combines both psychomotor impairment and behavioural factors involved in maintaining wakefulness [Bennett]. As with the MWT, the original test comprised four 40-min sessions, [Sunwoo] but other researchers have developed shorter versions with 1, 2, or 3 sessions, or with 20-min sessions or combined the test with additional testing protocols such as the multiple unprepared reaction time tests (MURT) [Gupta, Alakuijala].

## **Tests assessing sleepiness**

### **Multiple Sleep Latency Test (MSLT)**

The MSLT has now been in use for several decades as the 'gold standard' for assessing sleep propensity and is used most notably in the diagnosis of disorders of central hypersomnolence, such as narcolepsy and idiopathic hypersomnolence [Littner]. The test is not designed to measure sleepiness routinely as it is time-consuming and extremely labour-intensive, relying on a standardised approach and scoring sleep in real time undertaken by highly trained technical staff [Littner]. Additionally, it is not available in all centres that care for patients with OSAHS.

### **Maintenance of Wakefulness Test (MWT)**

This test assesses ability to maintain wakefulness under soporific conditions with no recourse to any stimulating activity. The test was designed as four 40-minute periods over



the course of a day [Littner, Doghramji]. A shortened 20-minute protocol has shown reduced sensitivity and specificity for assessing wakefulness and should not be used if there are questions regarding driving ability [Doghramji, Banks]. Motivation profoundly affects the Maintenance of Wakefulness test (MWT), particularly the 20-minute MWT protocol [Arzi, Shreter].

**Table e1.**

**Oxford Centre for Evidence-based Medicine Levels of Evidence (May 2001)**

|    |                                                                            |
|----|----------------------------------------------------------------------------|
| 1a | Systematic analysis (systematic review) of RCTs with homogenous results    |
| 1b | Particular RCT with limited dispersion                                     |
| 1c | Therapy, before its introduction all patients died                         |
| 2a | Systematic review of cohort studies with homogenous results                |
| 2b | Particular cohort studies or RCT of lower quality                          |
| 2c | "Outcomes" research; ecological studies                                    |
| 3a | Systematic review of case-control studies with homogenous results          |
| 3b | Particular case-control study                                              |
| 4  | Case studies and cohort studies or case-control studies of limited quality |
| 5  | Expert opinion                                                             |

RCT= Randomised controlled trial

**Table e2. Screening questionnaires on sleepiness, MVA and OSA in non-commercial (n=6) and commercial (n=11) drivers**

| Author                        | Design                 | EB<br>M | Patient population and methods                                                                                                                                          | Results                                                                                                                                                                                                                                                                                                                                                                                                                                                             | Comments                                                   |
|-------------------------------|------------------------|---------|-------------------------------------------------------------------------------------------------------------------------------------------------------------------------|---------------------------------------------------------------------------------------------------------------------------------------------------------------------------------------------------------------------------------------------------------------------------------------------------------------------------------------------------------------------------------------------------------------------------------------------------------------------|------------------------------------------------------------|
| <i>Non-commercial drivers</i> |                        |         |                                                                                                                                                                         |                                                                                                                                                                                                                                                                                                                                                                                                                                                                     |                                                            |
| Al-Abri et al, 2018 (1)       | Cross sectional study  | 4       | 492 young adult Omani non-commercial drivers. Berlin Questionnaire (BQ) and Epworth Sleepiness Scale (ESS) along with additional questions about their sleeping habits. | 124 Omanis (25.2%) reported experiencing daytime sleepiness while driving at least once per month. There was a significant association between nocturnal sleep duration of <6 hours and sleepiness while driving ( $P = 0.042$ ). Male drivers were significantly more likely to report sleepiness while driving ( $P = 0.001$ ). Overall, sleepiness while driving was significantly associated with ESS and BQ scores ( $P = 0.023$ and $<0.001$ , respectively). | Weaknesses: subjective information; no report on accidents |
| Goncalves et al, 2015 (2)     | Cross sectional study  | 4       | 12,434 questionnaires (general population). ESS, STOP-Bang Questionnaire                                                                                                | Among men, the prevalence of falling asleep at the wheel, and of MVA due to falling asleep, increased significantly with OSA risk. A dose-response association between OSA risk and falling asleep at the wheel was found after adjustment for potential confounders: OR = 1.83 (95% CI: 1.54; 2.18) for intermediate OSA risk; and OR = 3.48 (95% CI: 2.78; 4.36) for high OSAS risk                                                                               | Self-selection and recall bias ; no verification of MVA    |
| Quera Salva et al, 2014 (3)   | Cross sectional survey | 4       | 3051 drivers. ESS, Basic Nordic Sleep Questionnaire (BNSQ), and a travel questionnaire;                                                                                 | Eighty-seven (2.9%) drivers reported near-miss sleepy accidents (NMSA) during the trip; 8.5% of NMSA occurred during the past year and 2.3% reported sleepiness-related accidents in the past year.                                                                                                                                                                                                                                                                 | No verification of MVA                                     |

|                             |                                        |    |                                                                                                                                                                                                                                                                                                                                                |                                                                                                                                                                                                                                                                                                                                                        |                                                                                                                                                                                                                    |
|-----------------------------|----------------------------------------|----|------------------------------------------------------------------------------------------------------------------------------------------------------------------------------------------------------------------------------------------------------------------------------------------------------------------------------------------------|--------------------------------------------------------------------------------------------------------------------------------------------------------------------------------------------------------------------------------------------------------------------------------------------------------------------------------------------------------|--------------------------------------------------------------------------------------------------------------------------------------------------------------------------------------------------------------------|
|                             |                                        |    | data from the past 24 h and information on usual sleep schedules                                                                                                                                                                                                                                                                               | Significant risk factors for NMSA during the trip were: NMSA in the past year, nonrestorative sleep and snoring in the past 3 months, and sleepiness during the interview.                                                                                                                                                                             |                                                                                                                                                                                                                    |
| Philip et al, 2010 (4)      | Cohort study                           | 4  | Frequent highway drivers (n=37,648), internet based survey                                                                                                                                                                                                                                                                                     | Sleepiness significant risk factor for MVA, no increased risk with diagnosis of OSA                                                                                                                                                                                                                                                                    | Self-reported, internet-based                                                                                                                                                                                      |
| Vaz Fragoso et al, 2010 (5) | Prospective observational cohort study | 2b | 430 older persons non-commercial drivers. Self-reported driving patterns and sleep questionnaires-Insomnia Severity Index (ISI), ESS, and Sleep Apnea Clinical Score (SACS).<br><br>Driving records categorised as a crash or traffic-infraction (composite-I), or as a crash, traffic-infraction, near-crash, or getting lost (composite-II). | 19.9% (84/422) had high sleep apnoea risk (SACS>15). Drowsy-driving was reported by only 5.1%. Over a $\leq 2$ years, 24.9% (104/418) and 51.4% (215/418) of participants had a composite-I and -II driving event, respectively. Insomnia, daytime drowsiness, and high sleep apnoea risk were not associated with a composite-I or -II driving event. | Weaknesses: subjective information;<br><br>Information on crashes and traffic-infractions based on self-report and review of driving records from the Connecticut Departments of Motor Vehicles and Transportation |
| Vaz Fragoso et al, 2008 (6) | cross-sectional survey                 | 4  | 430 active drivers aged $\geq 70$ years. Questionnaires measured self-reported insomnia (ISI), drowsiness (ESS), apnoea risk                                                                                                                                                                                                                   | One fifth of the cohort had an SACS $> 15$ , indicating high risk for OSAS. Overall driver self-ratings were lower in participants with insomnia symptoms, as well as in those with ESS $\geq 10$ . Sleep disturbances were not                                                                                                                        | Participants predominantly male                                                                                                                                                                                    |

|                           |                       |   |                                                                                                                                                      |                                                                                                                                                                                                                                                                                                                                          |                                                                                 |
|---------------------------|-----------------------|---|------------------------------------------------------------------------------------------------------------------------------------------------------|------------------------------------------------------------------------------------------------------------------------------------------------------------------------------------------------------------------------------------------------------------------------------------------------------------------------------------------|---------------------------------------------------------------------------------|
|                           |                       |   | (SACS), driving mileage, driver self-ratings (overall and nighttime), and prior adverse driving events                                               | associated with an increase in prior adverse driving events                                                                                                                                                                                                                                                                              | subjective information on driving events                                        |
| <i>Commercial drivers</i> |                       |   |                                                                                                                                                      |                                                                                                                                                                                                                                                                                                                                          |                                                                                 |
| Guglielmi et al, 2018 (7) | Cross sectional study | 4 | 526 truck drivers<br>STOP-Bang questionnaire<br>Epworth sleepiness scale<br>Pittsburgh sleep quality index<br>General health questionnaire recorded. | Half of the sample (269; 51.1%) were at risk for OSA, 19.8% (104) complained of psychological distress, and 17.3% (91) of were bad sleepers, while only 8.9% (47) reported EDS.<br><br>The association between psychological distress and OSA lost significance when low sleep quality and sleepiness were added in logistic regression. | Findings were based solely on self-reported data.<br><br>No report on accidents |
| Garbarino et al, 2016 (8) | Cohort study          | 4 | truck drivers n=949, completed Berlin Questionnaire and ESS, were asked about motor vehicle accidents (MVA) and near misses (NMA)                    | MVA: 34.8% NMA: 9.2%<br><br>OSA predicted MVA (OR 2.32) and NMA (OR 2.39)                                                                                                                                                                                                                                                                | No verification of MVA                                                          |
| Zwahlen et al, 2016 (9)   | Cohort study          | 4 | 128 private and professional drivers<br><br>Questionnaire consisted of 20 questions including ESS, Berlin Questionnaire (BQ)                         | 9% of the participants reported EDS. An equal percentage was at high risk for OSA based on BQ. 16% admitted an involuntary nodding off while driving. This subset of the participants scored statistically significant higher on the ESS.                                                                                                | Low response rate<br>Selection bias<br>No verification of                       |

|                             |                       |   |                                                                                                                                                                                                                   |                                                                                                                                                                                                                                                                              |                                                                     |
|-----------------------------|-----------------------|---|-------------------------------------------------------------------------------------------------------------------------------------------------------------------------------------------------------------------|------------------------------------------------------------------------------------------------------------------------------------------------------------------------------------------------------------------------------------------------------------------------------|---------------------------------------------------------------------|
|                             |                       |   |                                                                                                                                                                                                                   | No significant difference in BQ between participants with and without involuntary nodding-off. 8% of the participants already suffered an accident secondary to being sleepy while driving. An equal number experienced a sleepiness-related near-miss accident on the road. | MVA                                                                 |
| Ebrahimi et al, 2015 (10)   | Cross sectional study | 4 | 556 occupational road drivers Pittsburgh Sleep Quality Index (PSQI) Epworth Sleepiness Scale (ESS) and the 8-question STOP-Bang questionnaire along with demographic information and occupational data were used. | Accident records within the last year and the past 5 years were reported by 6.1% and 23.8%, respectively. ESS (OR = 1.13; 95% CI: 1.07-1.23) and suffering from apnoea (OR = 4.89; 95% CI: 1.07-23.83) were the best predictors for increased risk of MVA.                   | No verification of MVA                                              |
| Demirdöğen et al, 2015 (11) | Cohort study          | 4 | Commercial drivers n=282, completed BQ and ESS, were asked about MVA                                                                                                                                              | No significant relationship between past MVA and OSA risk (p=0.197)                                                                                                                                                                                                          | No verification of MVA                                              |
| Barger et al, 2015 (12)     | Cohort study          | 4 | Firefighters n=6,933 (92% men, age 40±9 yrs, BMI 28.4±4.3 kg/m <sup>2</sup> ), Berlin Questionnaire, MVA by records                                                                                               | N=1,969 (28%) screened positive for OSA, risk of combined sleep disorder OR 2.00 (p=0.0021) for MVA                                                                                                                                                                          | No separate analysis for OSA                                        |
| Catarino et al, 2014 (13)   | Cross sectional study | 4 | Sample of 714 commercial truck drivers; questionnaire (244 face-to-face interviews, 470 self-administered) including: sociodemographic data, personal                                                             | EDS in 20% of drivers, high risk for OSA in 29%. Near-miss accidents reported by 261 drivers (36.6 %; 42.5% of them were sleep related). Driving accidents reported by 264 drivers (37.0 %; 16.3 % of them were sleep related).                                              | Likely under-reporting of symptoms. Lower desirable overall rate of |

|                         |                        |   |                                                                                                                                                                                                                                      |                                                                                                                                                                                                                                                                                                                                                                              |                                                                                                                                             |
|-------------------------|------------------------|---|--------------------------------------------------------------------------------------------------------------------------------------------------------------------------------------------------------------------------------------|------------------------------------------------------------------------------------------------------------------------------------------------------------------------------------------------------------------------------------------------------------------------------------------------------------------------------------------------------------------------------|---------------------------------------------------------------------------------------------------------------------------------------------|
|                         |                        |   | habits, previous accidents, ESS, and BQ.                                                                                                                                                                                             | <p>ESS score <math>\geq 11</math> was a risk factor for near-miss accidents (odds ratio (OR)=3.84, <math>p &lt; 0.01</math>) and accidents (OR=2.25, <math>p &lt; 0.01</math>).</p> <p>Antidepressant use increased accident risk (OR=3.30, <math>p = 0.03</math>).</p> <p>Association between Mallampati score III–IV and near misses (OR=1.89, <math>p = 0.04</math>).</p> | <p>response to the questionnaire.</p> <p>Self-reported MVA</p>                                                                              |
| Amra et al, 2012 (14)   | cross-sectional survey | 4 | Persian commercial drivers (n=931, mean age $\pm$ SD: 40.2 $\pm$ 10.1 yrs), response rate 62% of invited drivers. Self administered questionnaire including: 1) personal information; 2) ESS; 3) BQ, and 4) history of previous MVA. | <p>Witnessed apnoea associated with a 2-fold increase (95% CI, 0.98–4.2, <math>P &lt; .04</math>) in the accident rate. High-risk Berlin for OSA associated with an increase in MVA rate to 0.25 (95% CI, 0.07–0.84, <math>P &lt; .02</math>). Neck circumference was also associated with an increase in MVA rate to 0.94 (95% CI, 0.89–0.99, <math>P &lt; .04</math>).</p> | <p>Weaknesses: questionnaire-based study; subjective information; response to question on MVA not verified by objective Police reports.</p> |
| Razmpa et al, 2011 (15) | Cohort study           | 4 | Bus drivers (n=175, 100% male, age 43 $\pm$ 7, BMI 26.4 $\pm$ 3.9 kg/m <sup>2</sup> ), self-reported MVA, OSA assessment by ESS and Apnea Index score                                                                                | No correlation between OSA risk and MVA                                                                                                                                                                                                                                                                                                                                      | OSA risk assessment based on ESS and a non-validated OSA score                                                                              |

|                            |                              |    |                                                                                                                                                                                                                                                                                                                                               |                                                                                                                                                                                                                                                                                                                                                                                                                               |                                                                                                                                                                                |
|----------------------------|------------------------------|----|-----------------------------------------------------------------------------------------------------------------------------------------------------------------------------------------------------------------------------------------------------------------------------------------------------------------------------------------------|-------------------------------------------------------------------------------------------------------------------------------------------------------------------------------------------------------------------------------------------------------------------------------------------------------------------------------------------------------------------------------------------------------------------------------|--------------------------------------------------------------------------------------------------------------------------------------------------------------------------------|
| Braeckman et al, 2011 (16) | Cross-sectional survey       | 4  | <p>Eligible male truck drivers (n=1580), respondents (n=476), response rate of 30%. Sample recruited with support of Belgian transport federations.</p> <p>Self-administered questionnaire including: 1) sociodemographic data; 2) Pittsburgh Sleep Quality Index (PSQI); 3) Epworth Sleepiness Scale (ESS); 4) Berlin Questionnaire (BQ)</p> | <p>Mean (SD) PSQI score was 4.45 (2.7); poor quality of sleep (PSQI &gt;5) in 27.2%. The mean (SD) ESS score was 6.79 (4.17); score &gt;10 in 18%. According to BQ, 21.5% had a high risk for OSA. In multiple logistic regression analysis, low educational level (odds ratio [OR] 1.86), current smoking (OR 1.75), unrealistic work schedule (OR 1.75), and risk for OSA (OR 2.97) were independent correlates of EDS.</p> | <p>Low response rate (30%); questionnaire-based study; and possible underreporting of health or sleep problems or unhealthy lifestyle habits</p> <p>No report on accidents</p> |
| Vennelle et al, 2010 (17)  | Cross-sectional Case-control | 3b | <p>Bus drivers employed within 30 miles of Edinburgh (invited n=1854, respondent n=677, response rate 37%; females: n=25). Sleep questionnaire.</p> <p>Controls were 200 consecutive patients referred for sleep studies.</p>                                                                                                                 | <p>Of the responding drivers, 133 (20% of total, 19% of researcher-delivered questionnaires) reported ESS &gt;10. 8% reported falling asleep at the wheel at least once/month, 7% reported an accident, and 18% a near-miss accident due to sleepiness while working.</p>                                                                                                                                                     | <p>Low rate of volunteering for sleep studies (15%)</p>                                                                                                                        |

Abbreviations: BQ: BNSQ: Basic Nordic Sleep Questionnaire, Berlin Questionnaire; EDS: excessive daytime sleepiness; ESS: Epworth Sleepiness Scale; ISI: Insomnia Severity Index; MVA: motor vehicle accidents; NMA: near misses accidents; NMSA: near-miss sleepy accidents; OSA: Obstructive sleep apnoea; PSQI: Pittsburgh Sleep Quality Index; SACS: Sleep Apnea Clinical Score; SD: Standard Deviation.



**Table e3. Motor vehicle accidents (MVA) and polysomnography-documented OSA: systematic reviews, studies in non-commercial and commercial drivers, studies in sleep clinic samples**

| Author                                      | Design                                 | EBM | Patient population                                                                                                                     | Results                                                                                                                                                                                                                                                        | Comments                                                                  |
|---------------------------------------------|----------------------------------------|-----|----------------------------------------------------------------------------------------------------------------------------------------|----------------------------------------------------------------------------------------------------------------------------------------------------------------------------------------------------------------------------------------------------------------|---------------------------------------------------------------------------|
| <i>Systematic reviews and meta-analyses</i> |                                        |     |                                                                                                                                        |                                                                                                                                                                                                                                                                |                                                                           |
| Garbarino et al, 2015 (18)                  | Systematic review                      | 3a  | Meta-analysis of 9 studies, risk of MVA                                                                                                | Risk for MVA associated with OSA (AHI>5): median OR 2.83(95% CI: 2.72–3.08). About 7% of total MVA can be attributed to OSA                                                                                                                                    | No dose-effect relationship according to OSA severity                     |
| Tregear et al, 2009 (19)                    | Systematic review                      | 3a  | Meta-analysis of 18 studies, only 2 studies related to commercial drivers                                                              | Untreated OSA significantly associated with MVA (pooled OR 2.43, p=0.013)                                                                                                                                                                                      |                                                                           |
| Ellen et al, 2006 (20)                      | Systematic review                      | 3a  | Forty pertinent studies were identified investigating whether non-commercial and commercial drivers with OSA have increased crash rate | Non-commercial OSA drivers have increased crash rates, with many of the studies finding a 2 to 3 times increased risk.<br><br>For commercial drivers, only 1 of 3 studies found an increased crash rate, with this association being weak (odds ratio of 1.3). | Mostly male patients;<br><br>studies heterogeneous for used methodologies |
| <i>General population</i>                   |                                        |     |                                                                                                                                        |                                                                                                                                                                                                                                                                |                                                                           |
| Gottlieb et al, 2018 (21)                   | Prospective observational cohort study | 2b  | 3201 participants (general population)<br><br>Home polysomnography and                                                                 | 222 (6.9%) reported at least one motor vehicle crash during the prior year. A higher AHI ( $p < 0.01$ ), fewer hours of sleep ( $p = 0.04$ ), and self-reported excessive sleepiness ( $p < 0.01$ ) were each                                                  | Self-reported MVA                                                         |

|                         |              |   |                                                                                                                                                                                                                                      |                                                                                                                                                                                                                                                                                                                                                                                                                    |                   |
|-------------------------|--------------|---|--------------------------------------------------------------------------------------------------------------------------------------------------------------------------------------------------------------------------------------|--------------------------------------------------------------------------------------------------------------------------------------------------------------------------------------------------------------------------------------------------------------------------------------------------------------------------------------------------------------------------------------------------------------------|-------------------|
|                         |              |   | questionnaires used to assess history of motor vehicle crashes, usual sleep duration and daytime sleepiness (Epworth Sleepiness Scale)                                                                                               | significantly associated with crash risk. The population-attributable fraction of motor vehicle crashes was 10% due to sleep apnoea and 9% due to sleep duration less than 7 hours.                                                                                                                                                                                                                                |                   |
| Howard et al, 2004 (22) | Cohort study | 4 | 3,268 drivers were invited to complete a questionnaire and anthropometrics. Another sample of 244 drivers also invited to attend in-laboratory PSG                                                                                   | More than half (59.6%) of drivers had SDB and 15.8% had OSA, 24% reported excessive sleepiness. Increasing sleepiness was related to an increased accident risk. Those with symptoms of OSA had a higher risk of any MVA, and of a single MVA (OR 1.63, 95% CI 1.08–2.48). In the PSG group, there was no relationship between severity of SDB and MVA risk (OR 0.82, 95% CI 0.15–3.57 for change in RDI of 1 SD). | Self-reported MVA |
| Shiomi et al, 2002 (23) | Cohort study | 4 | 492 men and 62 women (general population)<br><br>All subjects underwent PSG.<br><br>In addition, a medical history was obtained, including sleeping habits, ESS, and a questionnaire evaluation of MVA during the preceding 5 years. | The MVA rate was 3.8% for the 106 simple snorers, 5.8% for the 156 patients with mild OSAHS, 9.9% for the 111 patients with moderate OSAHS, and 11.0% for the 182 patients with severe OSAHS                                                                                                                                                                                                                       |                   |
| Masa et al,             | Cohort study | 4 | 107 sleepy drivers                                                                                                                                                                                                                   | The frequency of respiratory sleep disorders was                                                                                                                                                                                                                                                                                                                                                                   | Retrospective MVA |

|                               |                    |    |                                                                                                                                 |                                                                                                                                                                                                                                                                                                                                                                                                                                                                 |           |
|-------------------------------|--------------------|----|---------------------------------------------------------------------------------------------------------------------------------|-----------------------------------------------------------------------------------------------------------------------------------------------------------------------------------------------------------------------------------------------------------------------------------------------------------------------------------------------------------------------------------------------------------------------------------------------------------------|-----------|
| 2000 (24)                     |                    |    | 109 controls matched by age and sex<br><br>134 accepted PSG                                                                     | significantly higher in subjects with MVA (the adjusted OR for a total respiratory event index > 15 was 8.5, CI 5 1.2 to 59).                                                                                                                                                                                                                                                                                                                                   | reporting |
| Teran-Santos et al, 1999 (25) | Case-control study | 3b | 102 drivers who had emergency treatment after MVA. Controls: 152 patients randomly selected from primary care centres           | Compared with those without sleep apnoea, patients with an AHI $\geq 10$ had an odds ratio of 6.3 (95% CI, 2.4 to 16.2) for having a MVA.                                                                                                                                                                                                                                                                                                                       |           |
| Young et al, 1997 (26)        | Cohort study       | 4  | 913 licensed motor vehicle drivers (general population)<br><br>data from 5-year MVA records<br><br>PSG                          | Men with AHI >5, compared to those without sleep-disordered breathing, were significantly more likely to have at least one accident in 5 years (adjusted odds ratio = 3.4 for habitual snorers, 4.2 for AHI 5-15, and 3.4 for AHI > 15). Men and women combined with AHI > 15 were significantly more likely to have multiple accidents in 5 years than control subjects (odds ratio = 7.3).                                                                    |           |
| Kingshott et al, 2004 (27)    | Case-control study | 2b | 60 motor vehicle crash drivers who had been in a police-reported traffic crash and 60 controls matched for age, gender, and BMI | Cases reported significantly higher levels of driver sleepiness (% sleepiness: mean SD; cases: $26 \pm 17\%$ ; controls: $16 \pm 12\%$ ; $p = 0.003$ ) and showed slower reaction times on a sustained attention task ( $p = 0.02$ ). There was a trend for more objective sleepiness in cases (maintenance of wakefulness test: cases: $17 \pm 4$ minutes; controls: $18 \pm 3$ minutes, $p = 0.06$ ) despite no differences in general subjective sleepiness. |           |

|                            |                                        |    |                                                                                                                                                                  |                                                                                                                                                                                                                                                                                                                                                           |                                                                                                                                                    |
|----------------------------|----------------------------------------|----|------------------------------------------------------------------------------------------------------------------------------------------------------------------|-----------------------------------------------------------------------------------------------------------------------------------------------------------------------------------------------------------------------------------------------------------------------------------------------------------------------------------------------------------|----------------------------------------------------------------------------------------------------------------------------------------------------|
|                            |                                        |    |                                                                                                                                                                  | There were no significant differences in PSG measures between groups.                                                                                                                                                                                                                                                                                     |                                                                                                                                                    |
|                            |                                        |    |                                                                                                                                                                  |                                                                                                                                                                                                                                                                                                                                                           |                                                                                                                                                    |
| <i>Commercial drivers</i>  |                                        |    |                                                                                                                                                                  |                                                                                                                                                                                                                                                                                                                                                           |                                                                                                                                                    |
| Wu et al, 2017 (28)        | Prospective observational cohort study | 2b | 1650 professional drivers<br><br>Basic and working patterns questionnaire, PSQI, ESS, Snore outcomes survey (SOS)questionnaire                                   | Road traffic collisions (RTC) drivers had increased ODI4 levels ( $5.8 \pm 4.7$ vs $5.0 \pm 6.7$ events/h; $P = 0.008$ ) and ODI3 levels ( $8.7 \pm 6.8$ vs $7.4 \pm 7.9$ events/h; $P = 0.007$ ) in comparison with non-RTC drivers. ODI4 and ODI3 levels increased the 6-year RTC risks among professional drivers even after adjusting for confounders | No PSG study<br><br>Sleep assessment tools were tested only once, at the beginning of the study<br><br>No treatment status at the end of follow up |
| Garbarino et al, 2016 (29) | Cohort study                           | 2b | Dangerous goods truck drivers n=283, sleep disorder score used for screening, PSG performed for suspected cases, assessment for MVA and near miss accidents(NMA) | Confirmed OSA n=101 (35.7%).<br><br>Severe OSA associated with NMA (OR 4.745)                                                                                                                                                                                                                                                                             | No verification of MVA                                                                                                                             |
| Meuleners et al, 2015 (30) | Case-control                           | 2b | Truck drivers with MVA in last 12 months n=100<br><br>Truck drivers without MVA                                                                                  | AHI>17 in 31 cases (49%) and 23 controls (35%) ( $p=0.12$ ). multivariate analysis OSA was associated with OR for MVA: 3.42 ( $p=0.01$ )                                                                                                                                                                                                                  | Self-reported MVA, no oxymetry data                                                                                                                |

|                            |              |    |                                                                                                                                                                            |                                                                                                                                                                                              |                                                                                           |
|----------------------------|--------------|----|----------------------------------------------------------------------------------------------------------------------------------------------------------------------------|----------------------------------------------------------------------------------------------------------------------------------------------------------------------------------------------|-------------------------------------------------------------------------------------------|
|                            |              |    | n=100<br><br>Limited home study in 63 cases and 65 controls                                                                                                                |                                                                                                                                                                                              |                                                                                           |
| Karimi et al, 2015 (31)    | Cohort study | 2b | Bus and tram operators<br><br>OSA n=1,478 (70%male, age 54±13 yrs, BMI 29.2±5.5 kg/m <sup>2</sup> , AHI 17.9 [3.2-24.2])<br><br>Control group from MVA registry (n=21,118) | OSA with MVA n=56, increased risk for MVA: 2.45 (p<0.001)                                                                                                                                    | CPAP>4 hrs reduced risk                                                                   |
| Stevenson et al, 2014 (32) | Case-Control | 2b | Heavy-vehicle drivers with MVA (n=530) and without MVA (n=517), MVA verified.<br><br>Objective OSA testing by Flow Wizard                                                  | Moderate OSA: MVA 18% vs no MVA 14%<br><br>Severe OSA: MVA 13% vs no MVA 16 %<br><br>No association OSA with MVA                                                                             | Drivers experience, driving at night and without break were significant predictors of MVA |
| Karimi et al, 2013 (33)    | Cohort study | 4  | Bus and tram operators (n=101, 72% male, age 48 [22-64], BMI 27 [16-39])                                                                                                   | OSA in 25% of the sample. OSA with EDS significantly associated with MVA, but not OSA without EDS                                                                                            | Self-reported MVA                                                                         |
| Carter et al, 2003 (34)    | Case-control | 3b | 1389 professional lorry and bus male drivers from Sweden; 4000 men in general population in Sweden. Questionnaire and PSG in 161 professional drivers.                     | No difference between those with and without reported OSAS. Accidents related to sleep debt.<br><br>Professional drivers had proportionally more sleep debt than non-professionals (p<0.001) | Self-perceived sleep debt more important than OSAS                                        |

| <i>Sleep clinic samples and OSA patients</i> |                    |    |                                                                                                                                                                                              |                                                                                                                                                                                                                                                                                                                                                                 |                                                    |
|----------------------------------------------|--------------------|----|----------------------------------------------------------------------------------------------------------------------------------------------------------------------------------------------|-----------------------------------------------------------------------------------------------------------------------------------------------------------------------------------------------------------------------------------------------------------------------------------------------------------------------------------------------------------------|----------------------------------------------------|
| Matsui et al, 2017 (35)                      | Cohort Study       | 4  | 161 patients with OSA ( AHI $\geq$ 5) who drove on a routine basis and completed study questionnaires. Assessment of sleepiness-related MVA or near-miss events during the prior 5 years     | 68 (42.2%) reported drowsy driving experiences, and 86 (53.4%) reported sleepiness-related vehicular accidents or near-miss events. AHI was not associated with these driving problems.                                                                                                                                                                         | Sampling bias<br>Self-reported MVA                 |
| Arita et al, 2015 (36)                       | Case-control       | 3b | Snorers n=394<br><br>Mild-moderate OSA n=1113<br><br>Severe OSA (AHI>30,<60) n=790<br><br>Very severe OSA (AHI>60) n=484<br><br>All licensed drivers, questionnaire on MVA in the last 5 yrs | The group with very severe OSAS reported significantly higher rates of driving when drowsy and having accidents in the past 5 years due to falling asleep                                                                                                                                                                                                       | ESS only predictor of RTA in multivariate analysis |
| Basoglu et al, 2014 (37)                     | Case-control study | 3b | 312 OSAS patients, 156 age- and sex-matched primary snoring subjects                                                                                                                         | More OSAS patients than snoring subjects reported accidents (21.2% vs. 11.5%, $P = .011$ ), and OSAS was associated with an increase in accident risk (odds ratio = 2.06, 95% confidence interval [CI], 1.17 to 3.61, $P = .012$ ). Younger OSAS patients ( $P = .001$ ) and those who were male ( $P = .001$ ), had greater neck circumference ( $P = .002$ ), | Retrospective, self-reported questionnaires        |

|                           |                    |    |                                                                                                                                                                                                 |                                                                                                                                                                                                                                                                                       |                                                                             |
|---------------------------|--------------------|----|-------------------------------------------------------------------------------------------------------------------------------------------------------------------------------------------------|---------------------------------------------------------------------------------------------------------------------------------------------------------------------------------------------------------------------------------------------------------------------------------------|-----------------------------------------------------------------------------|
|                           |                    |    |                                                                                                                                                                                                 | had a higher ESS ( $P < .0001$ ), and had a higher apnoea–hypopnoea index (AHI; $p = .039$ ) had more MVAs                                                                                                                                                                            |                                                                             |
| Ward et al, 2013 (38)     | Cohort study       | 4  | Clinical cohort evaluated for OSA $n=2,673$ (63%male, age $50 \pm 14$ yrs, BMI $32 \text{ kg/m}^2$ )<br><br>AHI males $31(17-56)$ , females $18(9-34)$<br><br>Self-reported MVA and near-misses | OSA OR $3.07$ ( $p < 0.001$ ) for MVA but no relationship to near-misses                                                                                                                                                                                                              | Relationship stronger in men than in women                                  |
| Komada et al, 2009 (39)   | Case-control study | 3b | OSA drivers ( $n=616$ , 100% male, age $46 \pm 10$ yrs), Controls: $n=600$ , age-matched                                                                                                        | MVA OSA vs controls ( $12.2$ vs $4.7\%$ , $P < 0.001$ ), multivariate analysis AHI $> 40$ OR $1.75$ for MVA ( $P < 0.05$ )                                                                                                                                                            | Controls had no PSG, MVA unverified, significant reduction in MVA with CPAP |
| Mulgrew et al, 2008 (40)  | Case-control study | 2b | 783 subjects evaluated for OSA, Control group from insurance database ( $n=783$ , age, sex-matched), objective MTA data                                                                         | MVA, OSA $n=252$ , controls $n=123$ . OSA associated with increased risk for MVA, no difference between controls and patients with negative PSG                                                                                                                                       | No difference according to OSA severity, no data on OSA in control group    |
| Lloberes et al, 2000 (41) | Case-control study | 3b | 189 consecutive patients (sleep clinic population) and a control group (CG) of 40 hospital staff workers matched for age and sex with                                                           | 122 patients were diagnosed as OSAS and 67 patients as non-apnoeic snorers (NAS). The self-reported number of accidents was significantly higher in OSAS patients compared with CG. The self-reported number of times off the road was significantly higher in OSAS patients compared | Lack of objective data about traffic accidents, no PSG in controls          |

|                            |                    |    |                                                                                                                                                                                                                                                               |                                                                                                                                                                                                                                                                                                                                                                                                                                                                                                                                                                                                                                                                                                     |  |
|----------------------------|--------------------|----|---------------------------------------------------------------------------------------------------------------------------------------------------------------------------------------------------------------------------------------------------------------|-----------------------------------------------------------------------------------------------------------------------------------------------------------------------------------------------------------------------------------------------------------------------------------------------------------------------------------------------------------------------------------------------------------------------------------------------------------------------------------------------------------------------------------------------------------------------------------------------------------------------------------------------------------------------------------------------------|--|
|                            |                    |    | <p>the study population</p> <p>Patients underwent a full-night PSG and both patients and the CG completed a questionnaire.</p>                                                                                                                                | <p>with NAS and with CG. Increased risk for MVA associated with: self-reported sleepiness while driving (OR 5, 95%CI 2.3–10.9), having quit driving because of sleepiness (OR 3, 95%CI 1.1–8.6) and being currently working (OR 2.8, 95%CI 1.1–7.7)</p>                                                                                                                                                                                                                                                                                                                                                                                                                                             |  |
| Horstmann et al, 2000 (42) | Case-control study | 3b | <p>156 patients with sleep apnoea syndrome (SAS) and in 160 age-gender matched controls</p>                                                                                                                                                                   | <p>In the SAS group 12.4% of all drivers had MVA as compared to 2.9% in the control group (p 34/h, n=78) as compared to 1.1 in patients with milder SAS (AHI 10-34/h, n=78) (p&lt;0.05), and 0.78 in control group (p&lt;0.005), respectively.</p>                                                                                                                                                                                                                                                                                                                                                                                                                                                  |  |
| Barbe et al, 1998 (43)     | Case-control study | 3b | <p>60 consecutive patients with SAS (AHI, 58± 3/h) and 60 healthy control subjects, matched for sex and age. Daytime sleepiness (Epworth scale), anxiety and depression (Beck tests), level of vigilance (PVT 192), and driving performance (Steer-Clear)</p> | <p>Patients had more MVA than control subjects (OR: 2.3; 95% CI: 0.97 to 5.33) and were more likely to have had more than one MVA (OR: 5.2; 95% CI: 1.07 to 25.29, p &lt; 0.05). These differences persisted after stratification for km/yr, age, and alcohol consumption. Patients were more somnolent, anxious, and depressed than control subjects (p &lt; 0.01), and they had a lower level of vigilance and poorer driving performance (p &lt; 0.01). Yet, no correlation between the risk of MVA in SAS patients and: the degree of daytime sleepiness, anxiety, depression, the number of respiratory events, nocturnal hypoxemia, level of vigilance, or driving simulator performance.</p> |  |
| Findley et                 | Case-control       | 3b | <p>Driving records of 29 patients</p>                                                                                                                                                                                                                         | <p>OSA patients had a 7-fold greater rate of MVA</p>                                                                                                                                                                                                                                                                                                                                                                                                                                                                                                                                                                                                                                                |  |



|                        |              |   |                                                                                                  |                                                                                                                                                                                                                                                                                                                                                                                                                                                          |                                                                                                                                                   |
|------------------------|--------------|---|--------------------------------------------------------------------------------------------------|----------------------------------------------------------------------------------------------------------------------------------------------------------------------------------------------------------------------------------------------------------------------------------------------------------------------------------------------------------------------------------------------------------------------------------------------------------|---------------------------------------------------------------------------------------------------------------------------------------------------|
| al,<br>1988 (44)       | study        |   | with OSA and of<br>35 subjects without OSA                                                       | than did the subjects without apnoea ( $p < 0.01$ ).<br><br>The % of persons with $\geq 1$ MVA was greater in OSA patients than in controls (31% versus 6%, $p < 0.01$ ). The % of persons having $\geq 1$ accidents in which they were at fault was also greater in OSA patients than in controls (24% versus 3%, $p < 0.02$ ). The MVA rate of OSA patients was 2.6 times the MVA rate of all licensed drivers in the state of Virginia ( $p < 0.02$ ) |                                                                                                                                                   |
| Wu et al,<br>1996 (45) | Cohort study | 4 | 253 patients (sleep clinic population) all studied by PSG and self-reported questionnaire on MVA | OSA in 68% of the sample. 82% of those reporting MVA had OSA. Thirty-one percent of patients with OSA compared with 15% of patients without OSA reported at least one MVA ( $p < 0.01$ ). The adjusted OR for MVA analysis was 2.58 for OSA ( $p = 0.03$ ).                                                                                                                                                                                              | Other significant factors for MVA were: alcohol intake, falling asleep at inappropriate times, and driving past destination with little awareness |

Abbreviations: AHI: Apnoea hypopnoea index; CG: control group; CPAP: continuous positive airway pressure; EDS: excessive daytime sleepiness; ESS: Epworth Sleepiness Scale; MVA: motor vehicle accidents; NAS: non-apnoeic snorers; NMA: near misses accidents; ODI3: oxygen desaturation index for  $\geq 3\%$  desaturation; ODI4: oxygen desaturation index for  $\geq 4\%$  desaturation; OR: Odds Ratio; OSA: Obstructive sleep apnoea; OSAHS: Obstructive sleep apnoea hypopnoea syndrome; OSAS: Obstructive sleep apnoea syndrome; PSG: Polysomnography; PSQI: Pittsburgh Sleep Quality Index; PVT: Psychomotor vigilance test; RTC: Road traffic collisions; SD: Standard Deviation. SOS: Snore outcomes survey questionnaire.

**Table e4. Predictors of excessive daytime sleepiness in obstructive sleep apnoea patients.**

| Author                   | Design                                                                                 | EBM | Population                                                                                                                                                                                        | Results                                                                                                                                                                                                                                                                                                                                                     | Comments                                                |
|--------------------------|----------------------------------------------------------------------------------------|-----|---------------------------------------------------------------------------------------------------------------------------------------------------------------------------------------------------|-------------------------------------------------------------------------------------------------------------------------------------------------------------------------------------------------------------------------------------------------------------------------------------------------------------------------------------------------------------|---------------------------------------------------------|
| Mendelson, 1995 (46)     | Retrospective study in subjects with suspected SDB at diagnosis                        | 4   | 518 OSA patients studied by full PSG, MSLT and subjective sleepiness questionnaire.                                                                                                               | At multiple regression analysis, 64% of subjective EDS variance accounted for by body weight; 71% of MSL accounted for by lowest SpO <sub>2</sub> in non-REM sleep                                                                                                                                                                                          | EDS assessed in a heterogeneous sample with SDB         |
| Zamagni et al, 1996 (47) | Subjects randomly selected out of a Sleep Clinic sample of subjects with suspected OSA | 2b  | 44 subjects with obstructive SDB of variable severity, full PSG with oesophageal pressure (Pes) recordings, modified MSLT, EDS evaluated by French adaptation of Basic Nordic Sleep questionnaire | Mean sleepiness score: 9.7, mean sleep latency 13.9 min. Mean maximal end-apnoeic Pes 49 cmH <sub>2</sub> O. At multiple regression analysis, independent contributors were for sleepiness score: apnoea index and Pes variables; for MSL: daytime PaCO <sub>2</sub> and indexes of nocturnal hypoxemia. No correlation with indexes of sleep fragmentation | Only subjective EDS correlated with respiratory effort. |
| Bennett et al, 1998 (48) | Subjects randomly selected out of a Sleep Clinic sample of subjects with suspected OSA | 2b  | 40 subjects with obstructive SDB of variable severity, full PSG with assessment of sleep fragmentation, ESS, OSLEP, MWT before and after CPAP                                                     | Baseline data: all sleep fragmentation indices, AHI and SpO <sub>2</sub> dip rate significantly associated with ESS scores<br><br>Post-CPAP improvement in subjective (Epworth) and objective (OSLEP) sleepiness best predicted by ODI 4%.                                                                                                                  |                                                         |
| Leng et al, 2003 (49)    | Retrospective consecutive case series, Asian patients with suspected OSA               | 4   | 72 patients, 41 OSA (AHI >5)<br><br>Subjective EDS = ESS<br><br>Objective EDS: non-sleepy: MSLT > 10 min; moderately sleepy 5-10 min; very sleepy                                                 | At multivariate analysis, mean sleep latency on MSLT negatively associated with ESS score ≥8 and AHI                                                                                                                                                                                                                                                        | EDS assessed in a heterogeneous sample with EDS         |

|                              |                                                     |    |                                                                                                                                                    |                                                                                                                                                                                                                                                     |                                                                             |
|------------------------------|-----------------------------------------------------|----|----------------------------------------------------------------------------------------------------------------------------------------------------|-----------------------------------------------------------------------------------------------------------------------------------------------------------------------------------------------------------------------------------------------------|-----------------------------------------------------------------------------|
|                              |                                                     |    | <5 min                                                                                                                                             |                                                                                                                                                                                                                                                     |                                                                             |
| Seneviratne et al, 2004 (50) | Retrospective, study in Asian OSA patients          | 4  | 195 OSA (89.4% males) patients studied by PSG and MSLT<br><br>EDS: mean sleep latency (MSL) on MSLT (no EDS: MSL $\geq$ 10 min; EDS: MSL < 10 min) | Independent predictors of EDS: high sleep efficiency, number of total arousals, and severity of snoring                                                                                                                                             | Sleep efficiency possibly reflecting longer sleep time in patients with EDS |
| Goncalves et al, 2004 (51)   | Prospective study in patients with suspected OSA    | 2b | 135 male subjects, full PSG, ESS, BDI, SF-36, report of driving accidents                                                                          | Mean ESS score in the sample: 15.1. ESS correlated with: arousal index, AHI and lowest SpO2. At multivariate analysis, age and AHI remained significant, explaining 41% of ESS variance. No variable was significant predictor of driving accidents |                                                                             |
| Bixler et al, 2005 (52)      | Prospective population study on determinants of EDS | 2b | Over 16,000 subjects undergoing questionnaire, over 1700 studied by PSG. EDS assessed by questionnaire.                                            | Prevalence of EDS in the whole population: 8.7%. Risk factors depression, BMI, age, sleep duration, diabetes, smoking and sleep apnoea. Peak OR EDS in subjects <30 yrs and elderly. EDS not associated with any polysomnographic parameter.        |                                                                             |

|                          |                                                       |    |                                                                                                                                                                                                                                        |                                                                                                                                                                                                                                                                                                                                                                                                                                                        |                                                                                                                                    |
|--------------------------|-------------------------------------------------------|----|----------------------------------------------------------------------------------------------------------------------------------------------------------------------------------------------------------------------------------------|--------------------------------------------------------------------------------------------------------------------------------------------------------------------------------------------------------------------------------------------------------------------------------------------------------------------------------------------------------------------------------------------------------------------------------------------------------|------------------------------------------------------------------------------------------------------------------------------------|
| Kapur et al, 2005 (53)   | Retrospective cross-sectional population study (SHHS) | 2b | 1149 OSA, full PSG<br><br>EDS= Epworth Sleepiness Scale score >10 or a report of at least frequently feeling unrested or sleepy.                                                                                                       | Sleepiness in about half of the sample, increasing with OSA severity. EDS associated with: self-reported short sleep duration, complaints of not getting enough sleep, respiratory disease, sleep maintenance insomnia, early morning awakening, habitual snoring, and awakening with leg cramps or jerks.<br><br>Sleepiness associated weakly with AHI, no association with sleep time, sleep efficiency, sleep stage distribution, or arousal index. | EDS classified based on Epworth and more liberal definitions. Highlights the role of comorbidities, role of depression not tested. |
| Mediano et al, 2007 (54) | Cross-sectional study in Caucasian OSA patients       | 2b | 40 patients with severe OSA undergoing full PSG and MSLT. EDS defined as ESS score >10 and MSLT score < 5 min.<br><br>No EDS (n=17) defined as ESS score <10 and MSLT >10 min;<br>EDS (n=23) defined as ESS score >10 and MSLT <10 min | Both MSLT and ESS score correlated with mean and lowest nocturnal SpO <sub>2</sub> , and high sleep efficiency. No differences in arousal index or overall distribution of sleep stages between the two groups.                                                                                                                                                                                                                                        |                                                                                                                                    |

|                                 |                                                             |    |                                                                                                                                                                                                                                                                                                                                                                    |                                                                                                                                                                                                                                                                     |  |
|---------------------------------|-------------------------------------------------------------|----|--------------------------------------------------------------------------------------------------------------------------------------------------------------------------------------------------------------------------------------------------------------------------------------------------------------------------------------------------------------------|---------------------------------------------------------------------------------------------------------------------------------------------------------------------------------------------------------------------------------------------------------------------|--|
| Barcelo et al, 2008 (55)        | Case-control study in OSA patients                          | 3b | <p>44 OSA patients studied by full PSG, MSLT, ESS and metabolic assessment (glucose, insulin, HOMA, lipids, TSH, cortisol, GH, IGF-1). 23 controls studied by cardiorespiratory polygraphy, ESS and metabolic assessment.</p> <p>EDS: ESS &gt;10, MSL&lt;5 min; no EDS: ESS&lt;10 and MSL&gt;10 min</p> <p>EDS+ and EDS- groups matched for age, BMI, and AHI.</p> | <p>Insulin resistance (HOMA) significantly related to MSLT and ESS, and lowest nocturnal SpO<sub>2</sub>.</p> <p>Positive effects of CPAP treatment on metabolic variables only in sleepy patients.</p>                                                             |  |
| Roure et al, 2008 (56)          | Multicentre cross-sectional study in Caucasian OSA patients | 2b | <p>2882 patients with AHI &gt;5, EDS defined as ESS score &gt;10 (EDS+ n=1649; no EDS n=1233)</p> <p>Evaluation of PSG variables</p>                                                                                                                                                                                                                               | <p>Patients with EDS exhibited overall longer TST and shorter sleep latency, greater sleep efficiency, reductions in NREM sleep stages 1-2 and longer SWS. A lower SaO<sub>2</sub> nadir, and greater AHI and arousal index were also found in sleepy patients.</p> |  |
| Koutsourelakis et al, 2008 (57) | Prospective study in subjects with suspected OSA            | 2b | <p>915 subjects studied by full PSG, ESS, BDI and clinical characteristics including comorbidities</p>                                                                                                                                                                                                                                                             | <p>ESS &gt;10 in 38.8% of the sample. RDI, depression and diabetes main correlated of ESS score at multivariate analysis. Minor significant contributions by: COPD, stroke, heart disease alcohol use, and BMI.</p>                                                 |  |

|                            |                                                            |    |                                                                                                                                                                                                                                                                                    |                                                                                                                                                                                                                                                                                                                                                                                                            |  |
|----------------------------|------------------------------------------------------------|----|------------------------------------------------------------------------------------------------------------------------------------------------------------------------------------------------------------------------------------------------------------------------------------|------------------------------------------------------------------------------------------------------------------------------------------------------------------------------------------------------------------------------------------------------------------------------------------------------------------------------------------------------------------------------------------------------------|--|
| Bausmer et al, 2010 (58)   | Retrospective study of OSA patients with ENT pathology     | 4  | 130 patients studied by full PSG and ESS                                                                                                                                                                                                                                           | No ESS data reported, only lack of correlation between sleep variables and ESS, with the exception of a weak relationship with arousal index.                                                                                                                                                                                                                                                              |  |
| Oksenberg et al, 2010 (59) | Retrospective cohort study in Caucasian OSA patients       | 2b | 644 severe OSA (AHI $\geq 30$ ). EDS defined as ESS $>10$ (data in 88.3% of the sample).                                                                                                                                                                                           | Sleepy patients were slightly younger and more obese, and showed shorter sleep latency and SWS compared to non-sleepy patients. Total recording time, Arousal Index and minimum SaO <sub>2</sub> during sleep differed significant between sleepy and non-sleepy patients. Comparing sleepy with very sleepy patients (ESS $\geq 16$ ), Apnoea Index was the most significant contributing factor for EDS. |  |
| Ishman et al, 2010 (60)    | Case-control study                                         | 3b | 47 OSA patients, 6 snorers, 51 controls. Full PSG, ESS, BDI-II                                                                                                                                                                                                                     | ESS not correlated with OSA severity, but direct relationship with BDI-II score                                                                                                                                                                                                                                                                                                                            |  |
| Chen et Al, 2011 (61)      | Retrospective study in Chinese patients with suspected OSA | 2b | 1035 consecutive OSA patients studied by full PSG. 249 snorers (AHI $<5$ ); 225 mild OSA (AHI 5-20); 171 moderate OSA (AHI $>20-40$ ); 390 severe OSA (AHI $>40$ ). Variables analyzed: daytime sleepiness (ESS $>10$ ), total sleep time (TST), sleep stages, respiratory arousal | ESS correlated with BMI, AHI, ODI, with the strongest association for ODI. Positive trend between ESS and time spent at SpO <sub>2</sub> $<90\%$ . No correlation of ESS with sleep structure                                                                                                                                                                                                              |  |

|                                      |                                                         |    |                                                                                                                                                                                                                             |                                                                                                                                                                                   |                                                               |
|--------------------------------------|---------------------------------------------------------|----|-----------------------------------------------------------------------------------------------------------------------------------------------------------------------------------------------------------------------------|-----------------------------------------------------------------------------------------------------------------------------------------------------------------------------------|---------------------------------------------------------------|
|                                      |                                                         |    | index, time SpO <sub>2</sub> <90%; lowest SpO <sub>2</sub> , ODI. Linear and stepwise multiple regression.                                                                                                                  |                                                                                                                                                                                   |                                                               |
| Sanchez-de-la Torre et al, 2011 (62) | Case-control study in OSA patients with and without EDS | 3b | 264 patients studied by full PSG, ESS, and evaluation of plasma hypocretin-1, neuropeptide Y, leptin, ghrelin, and adiponectin. EDS group (ESS≥13, n=132) and no-EDS group (ESS≤9, n=132) matched for gender, BMI, and AHI. | Patients with EDS showed higher hypocretin-1 and lower ghrelin than patients without EDS.                                                                                         |                                                               |
| Sun et al, 2012 (63)                 | Cross-sectional study, Chinese OSA patients             | 4  | 80 OSA patients studied by full PSG (AHI>5), MSLT, and ESS.<br><br>EDS (n=32): ESS >10 and MSLT score <5 min; no EDS (n=48)                                                                                                 | Arousal index, time spent at SaO <sub>2</sub> <95%, and REM sleep latency were independent predictors of EDS. More severe OSA in sleepy patients                                  |                                                               |
| Pamidi et al, 2011 (64)              | Cross-sectional study in OSA patients at diagnosis      | 2b | 931 patients studied by PSG; REM-related OSA (AHI-REM/AHI-NREM≥2, REM duration > 10.5 min, and AHI-NREM < 8): n=126;                                                                                                        | No differences in ESS score between REM-OSA and non-REM OSA. AHI-NREM was predictive of ESS in the entire cohort of patients.<br><br>In REM-related OSA, BMI and CES-D score were | Depression and obesity predicted ESS better than OSA severity |



|                             |                                                          |   |                                                                                                                                                                                                                                  |                                                                                                                                                                                                                                                                             |                                                                            |
|-----------------------------|----------------------------------------------------------|---|----------------------------------------------------------------------------------------------------------------------------------------------------------------------------------------------------------------------------------|-----------------------------------------------------------------------------------------------------------------------------------------------------------------------------------------------------------------------------------------------------------------------------|----------------------------------------------------------------------------|
|                             |                                                          |   | <p>non-stage specific OSA: n=805.</p> <p>ESS, Center for Epidemiologic Studies Depression Scale (CES-D) , and short-form quality of life questionnaire-12 (SF-12, mental [MCS-12] and physical component summaries [PCS- 12]</p> | <p>significant predictors of ESS and PCS-12 score.</p> <p>No relation of ESS with AHI-REM or AHI-NREM.</p>                                                                                                                                                                  |                                                                            |
| Bonsignore et al, 2012 (65) | Retrospective study in OSA patients                      | 4 | 529 patients studied by full PSG, ESS, and metabolic assessment (Metabolic syndrome, MetS)                                                                                                                                       | No difference in prevalence of EDS according to presence of MetS or insulin resistance. Age and mean nocturnal SpO <sub>2</sub> negatively associated with EDS.                                                                                                             |                                                                            |
| Cai et al, 2013 (66)        | Retrospective study, Chinese patients with suspected OSA | 4 | 80 OSA patients studied by full PSG (AHI>5), MSLT (EDS if sleep latency<10 min), and ESS (EDS if score>10).                                                                                                                      | <p>MSLT&lt;10 min in 56 patients, ESS &gt;10 in 71 patients. Mean sleep latency (MSL) and ESS correlated with ODI, lowest SpO<sub>2</sub>, arousal index, AHI, sleep efficiency and TST.</p> <p>Only MSL correlated with non-REM phase 1+2%, SWS and REM sleep latency.</p> | Only 68% of the sample reported driving, with possible ESS underestimation |

|                                |                                       |   |                                                                                                                                                                                                                                                                                                                                                   |                                                                                                                                                                                                                                                                                                                                   |                                                                                          |
|--------------------------------|---------------------------------------|---|---------------------------------------------------------------------------------------------------------------------------------------------------------------------------------------------------------------------------------------------------------------------------------------------------------------------------------------------------|-----------------------------------------------------------------------------------------------------------------------------------------------------------------------------------------------------------------------------------------------------------------------------------------------------------------------------------|------------------------------------------------------------------------------------------|
| Rey De Castro et al, 2013 (67) | Cross-sectional study in OSA patients | 4 | 151 OSA studied by full PSG.<br>No EDS: ESS≤10; EDS: ESS>10; severe EDS: ESS≥16                                                                                                                                                                                                                                                                   | ESS >10: 66 patients (44% of the sample); ESS ≥16: 23 patients (21%). Patients with OSA and EDS showed more severe hypoxemia than OSA without EDS, but the correlation between EDS and hypoxemia became not statistically significant at multivariate analysis.<br><br>No correlation between EDS and polysomnographic variables. | Respiratory events defined according to American Sleep Disorders Association (ASDA) 1992 |
| Jacobsen et al, 2013 (68)      | Retrospective, cross-sectional study  | 4 | 355 patients with severe OSA studied by full PSG, analysed according to ESS quartiles; lowest (ESS≤ 6: n=105) and highest (ESS ≥ 13: n=97) quartiles were compared.<br><br>ODI, SpO <sub>2</sub> nadir, AHI evaluated.<br><br>Patients with diagnosis of depression or treated with hypnotics, benzodiazepines, or antidepressants were excluded. | Compared with ESS ≤ 6, ESS ≥ 13 have lower SpO <sub>2</sub> nadir and higher ODI.<br><br>Trend for higher AHI in sleepy patients.<br><br>Higher CES-D questionnaire scores in sleepy patients despite exclusion of patients with depression.                                                                                      |                                                                                          |

|                          |                                     |    |                                                                                                                                                                                                                                     |                                                                                                                                                                                                 |                                                                                      |
|--------------------------|-------------------------------------|----|-------------------------------------------------------------------------------------------------------------------------------------------------------------------------------------------------------------------------------------|-------------------------------------------------------------------------------------------------------------------------------------------------------------------------------------------------|--------------------------------------------------------------------------------------|
| Slater et al, 2013 (69)  | Retrospective study                 | 4  | <p>335 patients studied by full PSG</p> <p>155 obese (BMI &gt;30)</p> <p>173 OSA (AHI &gt;5/h)(61 on CPAP treatment)</p> <p>55 with PLM disorder</p> <p>EDS defined by ESS &gt;10</p>                                               | Obesity (but not BMI), PLM disorder and hypertension were independently associated with ESS score. AHI was predictor of sleep latency on PSG.                                                   | Slater et al. 2013                                                                   |
| Uysal et al, 2014 (70)   | Cross-sectional study               | 4  | <p>N: 200 AHI≥15</p> <p>EDS: EES≥ 10, no EDS: ESS &lt;10</p> <p>Hypoxemia variables combined in a hypoxemia biomarker: ODI, average % oxygen desaturation, % of time with oxygen saturation &lt;90%, lowest % oxygen saturation</p> | The hypoxemia biomarker predicts EDS only in patients with severe OSA (AHI>50)                                                                                                                  | The hypoxemia variables do not predict EDS when not combined in the biomarker.       |
| Huamani et al, 2014 (71) | Retrospective study in OSA patients | 2b | <p>N: 518 with AHI≥5 and ESS (EDS= ESS &gt;10). Analysed variables: nocturnal hypoxemia (NH) byT90 and Maximum arterial oxygen desaturation (MOD):</p>                                                                              | <p>ESS&gt;10 in 50.6% of OSA patients; NH in 87.2% of OSA patients.</p> <p>EDS associated with nocturnal hypoxemia (NH).</p> <p>Higher probability of sleepiness in patients with NH&gt;10%</p> | Only men included. Studied conducted at high altitude (Lima, Peru) any environmental |

|                            |                                                                |    |                                                                                                                                                                                                               |                                                                                                                                                                                                                                                                                                                                                                                                                                                                                                                        |                                                                                                       |
|----------------------------|----------------------------------------------------------------|----|---------------------------------------------------------------------------------------------------------------------------------------------------------------------------------------------------------------|------------------------------------------------------------------------------------------------------------------------------------------------------------------------------------------------------------------------------------------------------------------------------------------------------------------------------------------------------------------------------------------------------------------------------------------------------------------------------------------------------------------------|-------------------------------------------------------------------------------------------------------|
|                            |                                                                |    | <p>Categories:</p> <p>no NH: T90=0%, MOD=0</p> <p>NH &lt;1%: MOD indicates NH but T90=0%</p> <p>NH 1-10% 1&lt;T90&gt;10%</p> <p>NH&gt;10%: T90 &gt;10%</p>                                                    |                                                                                                                                                                                                                                                                                                                                                                                                                                                                                                                        | effect on nocturnal hypoxemia?                                                                        |
| Corlateanu et al,2015 (72) | Cross-sectional study in consecutive OSA patients              | 4  | 50 subjects, respiratory polygraphy, ESS. Linear and multiple regression models.                                                                                                                              | EDS in 38% of the sample. Oxygen Desaturation index predicted EDS better than AHI. No effect of anthropometrics                                                                                                                                                                                                                                                                                                                                                                                                        |                                                                                                       |
| Adams et al, 2016 (73)     | Cross.sectional study in community-dwelling men (MAILES Study) | 2b | 837 subjects, studied by full PSG, ESS, STOP and PSQI, and a EDS alternate definition (EDSalt: ≥2 of the following: feeling sleepy sitting quietly, feeling tired/fatigued/sleepy, and trouble staying awake) | <p>ESS≥11 in 12.1% of the sample. No effect of OSA severity or BMI, or sleep variables by ESS status. At multivariate adjusted analysis, EDS associated with nocturia and depression.</p> <p>By using EDSalt definition, EDS in 30.4% of the sample. Increased adiposity, diabetes depression, nocturia, indices of severe OSA associated with EDSalt. At multivariate adjusted analysis, EDS associated with depression, physical inactivity, short sleep, social factors, and highest quartile of arousal index.</p> | Interesting study, suggests different dimensions of EDS with different instruments of EDS evaluation. |

|                              |                                                               |    |                                                                                                                                                 |                                                                                                                                                                                                                                                                    |                                            |
|------------------------------|---------------------------------------------------------------|----|-------------------------------------------------------------------------------------------------------------------------------------------------|--------------------------------------------------------------------------------------------------------------------------------------------------------------------------------------------------------------------------------------------------------------------|--------------------------------------------|
| Ryu et al, 2016 (74)         | Retrospective study in moderate-severe OSA patients in Korea  | 2b | 559 subjects, studied by full PSG, ESS, and Sleep Breathing Scale (SBS, subjective assessment of OSA severity), Beck Depression Inventory (BDI) | ESS score $\geq$ 11 in 40.6% of the sample.<br><br>At univariate analysis, ESS associated with SBS score, AHI, lowestSpO <sub>2</sub> , BMI, and BDI score. In multiple regression analysis, only SBS and BDI score correlated with ESS.                           |                                            |
| Huang et al, 2016 (75)       | Cross-sectional study in severe OSA patients (AHI $\geq$ 30)  | 4  | 175 subjects studied by full PSG, 119 with and 56 without EDS (ESS $\geq$ 10)                                                                   | Significant correlations between ESS score and components of MetS, including SBP, waist circumference, log TG, HDL-C, log fasting glucose and metabolic score. At multivariate analysis ESS score, log insulin and age significantly predicted the metabolic score |                                            |
| Lang et al, 2017 (76)        | Cross sectional study in urban community dwelling men         | 2b | 788 randomly selected, men aged 40 to 88 yrs without a prior diagnosis of OSA. Full PSG at home, EDS: ESS $>$ 10                                | Depression associated with AHI $>$ 30. Individuals with mild–moderate or severe OSA and EDS exhibited increased probability of depression compared to individuals with either condition alone                                                                      | Object of the study is depression, not EDS |
| Kim SA et al, 2017 (77)      | Cross sectional study in OSA                                  | 2b | 633 OSA patients diagnosed by PSG. Relationship between EDS assessed as ESS $>$ 10 and Fatigue Severity Scale (FSS)                             | ESS and other variables correlated with FSS. FSS score is more likely to be associated with younger age, sleepiness and insomnia, but less likely to be directly related to OSA severity                                                                           | About fatigue, not EDS                     |
| Martynowicz et al, 2017 (78) | Cross sectional, case-control study in hypertensives (HT) and | 3b | 304 HT and 67 NT. Full PSG and ESS                                                                                                              | In hypertensives $>$ AHI, ODI and %NREM2, $<$ SEI and %SWS. In the moderate to severe OSA groups, the total ESS score was significantly lower in HT compared with NT. The ESS scores                                                                               |                                            |

|                        |                                                                                 |    |                                                                                                                                                                                                                                                                                                        |                                                                                                                                                                                                                                                                                                                                                    |                                       |
|------------------------|---------------------------------------------------------------------------------|----|--------------------------------------------------------------------------------------------------------------------------------------------------------------------------------------------------------------------------------------------------------------------------------------------------------|----------------------------------------------------------------------------------------------------------------------------------------------------------------------------------------------------------------------------------------------------------------------------------------------------------------------------------------------------|---------------------------------------|
|                        | normotensives (NT)                                                              |    |                                                                                                                                                                                                                                                                                                        | decreased with age in HT, but not in NT                                                                                                                                                                                                                                                                                                            |                                       |
| Kim H et al, 2017 (79) | Cross sectional study in a sample from Korean general population (KoGES cohort) | 2b | 711 mild OSA (AHI $13.35 \pm 8.85$ ) and 781 non-OSA subjects, studied by PSG. EDS assessed as ESS>10                                                                                                                                                                                                  | Mean ESS score in the entire sample: 5. Mild significant differences between OSA and non-OSA subjects in Digit Symbol Test and in ESS, but substantially preserved cognitive function and QoL. Similar performances and QoL in sleepy (6.3% of the OSA sample) and non-sleepy OSA subjects. Hypoxia was mild and did not correlate with cognition. |                                       |
| Li Y et al, 2017 (80)  | Cross sectional study in OSA patients                                           | 4  | 58 untreated OSA patients, PSG for 4 consecutive nights, Psychomotor vigilance test (PVT), MSLT and ESS                                                                                                                                                                                                | PVT results correlated with ESS but not MSLT or IL-6. Suggests that ESS and PVT may be useful in predicting risks associated with impaired performance, such as traffic accidents, in patients with OSA.                                                                                                                                           | Same pts sample as in Li Y Sleep 2017 |
| Li Y et al, 2017 (81)  | Cross-sectional study in OSA patients                                           | 2b | 58 patients (AHI $\geq$ 10 women, $\geq$ 15 men) studied by full PSG for 4 nights; MSLT, and Stanford Sleepiness Scale (SSS) on the morning of 4 <sup>th</sup> day; 24-h blood samples to assess cortisol and interleukin-6 (4 <sup>th</sup> day). Beck Depression Inventory II (BDI-II) also assessed | MSL positively associated with 24-h IL-6 levels, and negatively associated with cortisol levels. ESS or SSS did not show any significant correlation with EDS.                                                                                                                                                                                     |                                       |

|                          |                                                                                              |    |                                                                                                                                                                                                          |                                                                                                                                                                                                                                                                                    |                                                          |
|--------------------------|----------------------------------------------------------------------------------------------|----|----------------------------------------------------------------------------------------------------------------------------------------------------------------------------------------------------------|------------------------------------------------------------------------------------------------------------------------------------------------------------------------------------------------------------------------------------------------------------------------------------|----------------------------------------------------------|
| Chen YC et al, 2017 (82) | Cross sectional study in patients with primary snoring, moderate-severe OSA, very severe OSA | 4  | Genome-wide gene expression array in PBMC of patients studied by PSG. Sleepiness assessed as ESS>10.                                                                                                     | Expression of the protein P130 (AMOt gene, angiomin variant 2, related to endothelial tight junction) increased in OSA, especially if associated with EDS                                                                                                                          | Small study, data should be confirmed by larger studies. |
| Fu et al, 2017 (83)      | Cross-sectional study in newly diagnosed OSA patients                                        | 2b | 2241 men with suspected OSA studied by PSG, mean age 40 yrs, mean BMI 26.9 kg/m <sup>2</sup> . Sleepiness assessed by ESS. Correlation between EDS and Metabolic Syndrome                                | Degree of obesity and ESS scores highest in severe OSA and significantly associated with metabolic syndrome, especially with increased fasting blood glucose.                                                                                                                      |                                                          |
| Prasad et al, 2018 (84)  | Cross-sectional study in newly diagnosed OSA patients                                        | 2b | 283 patients with AHI≥5 and age 35-60 yrs. Sleepiness assessed by ESS≥11 (subjective) and psychomotor vigilance test ≥2 lapses (objective). Chronotype assessed by actigraphy. Plasma TNF-alpha and IL-6 | Sample divided in 4 groups (subjective and objective sleepiness; objective sleepiness only, subjective sleepiness only, no sleepiness). African-American race and short daily sleep associated with increased EDS, morningness protective. IL-6, but not TNF, associated with EDS. | No control for depression or socioeconomic factors.      |
| Goh et al, 2018          | Retrospective study in suspected OSA                                                         | 2b | 821 suspected OSA with AHI ≥5. PSG and ESS                                                                                                                                                               | Age, apnoea load, REM, NREM 1 correlated to ESS independently but weakly. AHI not correlated                                                                                                                                                                                       | Apnoea and hypopnoea load as measured by their total     |

|                           |                                                                 |    |                                                                                                                                                                                                                            |                                                                                                                                                                                                                                                                                                             |                                              |
|---------------------------|-----------------------------------------------------------------|----|----------------------------------------------------------------------------------------------------------------------------------------------------------------------------------------------------------------------------|-------------------------------------------------------------------------------------------------------------------------------------------------------------------------------------------------------------------------------------------------------------------------------------------------------------|----------------------------------------------|
|                           |                                                                 |    |                                                                                                                                                                                                                            |                                                                                                                                                                                                                                                                                                             | durations                                    |
| D'Rozario et al,2018 (85) | Cross sectional, case-control study in OSA and non-OSA subjects | 3b | 204 untreated OSA pts and 50 non-OSA studied by PSG, ESS and a test battery including assessment of selective attention, executive function, working memory and sustained attention task (psychomotor vigilance test, PVT) | OSA patients showed worse cognitive, executive and working memory performance, and worse performance at PVT. High ESS was associated with slower performance at PVT. AHI or EEG arousal index not correlated with any performance measure, hypoxemia significantly associated with worse executive function |                                              |
| Nigro et al, 2018 (86)    | Retrospective analysis in OSA patients                          | 2b | 1084 untreated OSA patients studied by PSG, 46.5% women. EDS: ESS>10                                                                                                                                                       | EDS reported more frequently by men (42%) than by women (32%) with OSA. At multivariate logistic regression, predictors of EDS were: younger age, BMI, AHI, mean SaO <sub>2</sub> , lack of insomnia, and tiredness.                                                                                        | Study on influence of gender on OSA symptoms |

Abbreviations: AHI: Apnoea hypopnoea index; BDI: Beck Depression Inventory; BMI: Body mass index; CES-D: Center for Epidemiologic Studies Depression Scale; COPD: Chronic obstructive pulmonary disease; CPAP: continuous positive airway pressure; EEG: electroencephalogram; EDS: excessive daytime sleepiness; ENT: Ear, Nose, and Throat; ESS: Epworth Sleepiness Scale; FSS: Fatigue Severity Scale; HT: hypertensives;MOD: Maximum arterial oxygen desaturation; MetS: Metabolic syndrome; MSL: mean sleep latency; MSLT: mean sleep latency test; MWT: Maintenance of Wakefulness Test; NH: nocturnal hypoxemia; NT:normotensives; ODI: oxygen desaturation index; ODI4: oxygen desaturation index for  $\geq 4\%$  desaturation; OR: Odds Ratio; OSA: Obstructive sleep apnoea; Pes: oesophageal pressure; PLM: Periodic limb movement; PSG: Polysomnography; PSQI: Pittsburgh Sleep Quality Index; PVT: Psychomotor vigilance test; QoL: Quality of life; RDI: Respiratory Disturbance Index; SBP: Systolic Blood Pressure; SDB: Sleep Disorder Breathing; SF: short-form quality of life questionnaire; SHHS: Sleep Heart Health Study; SpO<sub>2</sub>: Oxygen saturation; SBS: Sleep Breathing Scale; SSS: Stanford Sleepiness Scale; TST: Total sleep time.



**Table e5. Predictors of excessive daytime sleepiness in obesity**

---

| Author                    | Design                                                               | EBM | Population                                                                                                                                                                                    | Results                                                                                                                                                                                     | Comments |
|---------------------------|----------------------------------------------------------------------|-----|-----------------------------------------------------------------------------------------------------------------------------------------------------------------------------------------------|---------------------------------------------------------------------------------------------------------------------------------------------------------------------------------------------|----------|
| Ng et al, 2017 (87)       | Meta-analysis on effects of intentional weight loss on EDS           | 1a  | 42 studies, surgical weight loss (n=15), non-surgical weight loss (n=27, 15 RCT)                                                                                                              | Larger weight loss after surgical than nonsurgical intervention, associated with decreased EDS (non-linear dose-response relationship). No relationship between EDS changes and AHI changes |          |
| Vgontzas et al, 1998 (88) | Case-control study. Obese patients with SDB excluded by study design | 3b  | 73 obese subjects without SDB, 45 age matched control. PSG for 8 h at night, and 2 1-h daytime naps. Daytime sleepiness assessed clinically (no ESS) and based on the results of nap studies. | Daytime sleepiness reported by 57% of obese subjects and 2% of controls. Worse nocturnal sleep amount and quality in obese patients, suggesting a circadian abnormality in obese patients.  |          |
| Resta et al, 2001 (89)    | Consecutive obese patients recruited in Endocrinology Clinic         | 2b  | 161 obese patients studied by full PSG (more than 50% BMI over 40). Sleep and Health Questionnaire and ESS. No OSA: AHI<10                                                                    | EDS reported by 35% of obese patients without OSA. No correlation between EDS with BMI, age, or RDI in this subpopulation                                                                   |          |
| Resta et al, 2003 (90)    | Case-Control study                                                   | 3b  | 78 severely obese patients without OSAS,<br>40 healthy sex- and age-matched normal weight subjects; PSG in both groups,                                                                       | EDS prevalence: 35%, in the obese non-OSA group, 3% in controls. In obese patients, no correlation between ESS score and age, BMI, neck circumference, RDI, arousal                         |          |

|                        |                                                                                                         |    |                                                                                                                                                                                                                                                                                  |                                                                                                                                                                                                                                                |                                                                      |
|------------------------|---------------------------------------------------------------------------------------------------------|----|----------------------------------------------------------------------------------------------------------------------------------------------------------------------------------------------------------------------------------------------------------------------------------|------------------------------------------------------------------------------------------------------------------------------------------------------------------------------------------------------------------------------------------------|----------------------------------------------------------------------|
|                        |                                                                                                         |    | <p>modified version of the Sleep and Healthy questionnaire, and the ESS</p> <p>Variables evaluated: BMI, neck circumference, waist-to- hip ratio(WHR) ,RDI ,TST, SaO2 &lt; 90%</p> <p>Sleep latency,REM sleep percentage ,REM latency , Sleep efficiency, Arousal index (AI)</p> | <p>index and sleep variables. Those reporting loud snoring had higher ESS score than those who did not have this symptom and ESS score increased progressively with the severity of reported snoring.</p>                                      |                                                                      |
| Dixon et al, 2005 (91) | Longitudinal study in severely obese patients undergoing laparoscopic adjustable gastric banding (LAGB) | 4  | 25 patients studied by full PSG and ESS before and 18 months after LAGB                                                                                                                                                                                                          | LAGB decreased body weight, ESS, and AHI. Improved QoL and depression                                                                                                                                                                          | No analysis on mechanisms for ESS reduction after LAGB, small sample |
| Dixon et al, 2007 (92) | Cohort study in patients undergoing obesity surgery (BMI >35 kg/m <sup>2</sup> )                        | 2b | <p>ESS administered to 1055 consecutive patients;</p> <p>331 at high risk for OSA performed PSG, no OSA (AHI &lt;5):n=70, OSA: n=261</p> <p>Variables evaluated: EDS by ESS scores, anthropometrics and sleep variables, QoL (SF-36) and Beck Depression score</p>               | ESS score<10 in 50% of the PSG sample. No relation between ESS and BMI, AHI, arousal index, sleep efficiency, sleep fragmentation, apnoea hypopnoea length, oxygen desaturation, periodic leg movements. High fasting plasmagluucose, low HDL- |                                                                      |

|                           |                                                               |   |                                                                                                                                        |                                                                                                                                                                                                                                             |                              |
|---------------------------|---------------------------------------------------------------|---|----------------------------------------------------------------------------------------------------------------------------------------|---------------------------------------------------------------------------------------------------------------------------------------------------------------------------------------------------------------------------------------------|------------------------------|
|                           |                                                               |   |                                                                                                                                        | <p>cholesterol,hyperinsulinemia and presence of type 2 diabetes were associated with higher ESS scores.</p> <p>Symptoms of depression, poor quality of life, and patient-reported nocturnal sleep disturbance also correlated with EDS.</p> |                              |
| Nerfeldt et al, 2010 (93) | Nonsurgical weight loss program in OSA patients               | 4 | 33 patients undergoing a 8-wk hypocaloric diet, and a support program for 2 years, + treatment with CPAP (in 19 pts) or MAD (in 4 pts) | Limited effect of weight loss on AHI, but decreased weight correlated with decreased ESS and insulin levels.                                                                                                                                |                              |
| Sharkey et al, 2013 (94)  | Retrospective studyin patients candidate to bariatric surgery | 4 | 269 patients (239 females) studied by full PSG, ESS, and FOSQ.<br><br>EDS defined as ESS $\geq 10$                                     | Average AHI: $29.5 \pm 31.5/h$ , mean ESS score: $6.3 \pm 4.8$ ; mean global FOSQ score $100 \pm 18$ . AHI did not correlate with ESS score.                                                                                                | Low self-reported sleepiness |
| Koehler et al, 2014 (95)  | Retrospective cohortstudy                                     | 4 | 245 obese OSA (BMI>35 and AHI>15/h) studied by full PSG<br><br>EDS: ESS score $\geq 11$                                                | ESS>11 in 50.2% of the sample. Sleepy patients were younger and showed more severe OSA than non-sleepy ones. Decreased mean SpO2 during sleep and time spent atSpO2 below 80 % were independent predictors of                               |                              |

|                                    |                                                                             |   |                                                                                                                                                                                        |                                                                                                                                                                                                            |  |
|------------------------------------|-----------------------------------------------------------------------------|---|----------------------------------------------------------------------------------------------------------------------------------------------------------------------------------------|------------------------------------------------------------------------------------------------------------------------------------------------------------------------------------------------------------|--|
|                                    |                                                                             |   |                                                                                                                                                                                        | EDS.                                                                                                                                                                                                       |  |
| Valencia-Flores et al, 2015 (96)   | Cross-sectional study in patients living at moderate altitude (Mexico City) | 4 | 78 obese subjects (23 F, 55 M)<br><br>OSA defined as AHI $\geq 5$ events/h<br><br>Alertness defined using Maintenance Wakefulness Test (MWT) as a mean sleep latency of $\geq 12$ min. | ESS > 10 in 17% of F, and 36% of M. ODI and SpO2 nadir were significantly and independently associated with MWT                                                                                            |  |
| Fernandez-Mendoza et al, 2015 (97) | Longitudinal population study (Penn Cohort)                                 | 2 | 1395 subjects studied by full PSG and sleepiness questionnaire at baseline and followed for 7.5 yrs. Factors associated with persistent, incident or remitted EDS                      | Obesity and weight gain associated with incidence and persistence of EDS, weight loss associated with EDS remission. Depression and comorbidities also investigated and involved in natural history of EDS |  |
| Ng et al, 2017 (87)                | Longitudinal analysis (SHHS data)                                           | 2 | 1468 subjects studied by full PSG and ESS at baseline and followed for 5 yrs. Complex statistical analysis to assess the relationship between weight changes and changes in ESS        | ESS at follow-up worsened by 0.36 units with every 10-kg weight gain. The effect was significant only in women and about 20% of this effect was mediated by OSA severity at 5 years.                       |  |

Abbreviations: AI: Arousal index; AHI: Apnoea hypopnoea index; BMI: Body mass index; CPAP: continuous positive airway pressure; EDS: excessive daytime sleepiness; ESS: Epworth Sleepiness Scale; FOSQ: Functional Outcomes of Sleep Questionnaire; LAGB: laparoscopic

adjustable gastric banding; MAD: Mandibular Advancement Devices; MWT: Maintenance of Wakefulness Test; ODI: oxygen desaturation index; OSA: Obstructive sleep apnoea; OSAS: Obstructive sleep apnoea syndrome; PSG: Polysomnography; QoL: Quality of life; RDI: Respiratory Disturbance Index; SDB: Sleep Disorder Breathing; SF: short-form quality of life questionnaire; SpO<sub>2</sub>: Oxygen saturation; TST: Total sleep time; WHR: waist-to- hip ratio.

**Table e6. OSA screening questionnaires: meta-analyses**

| Author                        | Design                              | EBM                  | Objectives and Patient population                                                                         | Results                                                                                                                                                                                                                                                                                                                                                                                                                                                                                                                                                                                                                                                                                                                              | Comments                                                                                                                                           | Observations for the future                                                                          |
|-------------------------------|-------------------------------------|----------------------|-----------------------------------------------------------------------------------------------------------|--------------------------------------------------------------------------------------------------------------------------------------------------------------------------------------------------------------------------------------------------------------------------------------------------------------------------------------------------------------------------------------------------------------------------------------------------------------------------------------------------------------------------------------------------------------------------------------------------------------------------------------------------------------------------------------------------------------------------------------|----------------------------------------------------------------------------------------------------------------------------------------------------|------------------------------------------------------------------------------------------------------|
| Ramachandran et al, 2009 (98) | Systematic review and Meta-analysis | 2a<br>Cohort studies | To compare clinical screening tests for OSA and to establish an evidence base for their preoperative use. | <p>26 studies (n=6794 patients with suspected OSA) met the inclusion criteria: 8 studies on questionnaires and 18 studies on algorithms, regression models and neural networks.</p> <p>Test accuracy in repeated validation studies of the same screening test is variable, suggesting an underlying heterogeneity in either the clinical presentation of OSA or the measured clinical elements of these models. The Berlin questionnaire and the Sleep Disorders Questionnaire were the two most accurate questionnaires.</p> <p>Predicting the diagnosis of OSA :</p> <ul style="list-style-type: none"> <li>- Pooled sensitivity 52%</li> <li>- Pooled specificity 80%</li> </ul> <p>Predicting the diagnosis of severe OSA :</p> | Based on the false-negative rates, it is likely that most of the clinical screening tests will miss a significant proportion of patients with OSA. | BIASES :<br><br>Significant differences between the validation study patients and surgical patients. |

|                             |                                     |                   |                                                                                       |                                                                                                                                                                                                                                                                                                                                                                                                                                                                                                                                           |                                                                           |                                                                                                                        |
|-----------------------------|-------------------------------------|-------------------|---------------------------------------------------------------------------------------|-------------------------------------------------------------------------------------------------------------------------------------------------------------------------------------------------------------------------------------------------------------------------------------------------------------------------------------------------------------------------------------------------------------------------------------------------------------------------------------------------------------------------------------------|---------------------------------------------------------------------------|------------------------------------------------------------------------------------------------------------------------|
|                             |                                     |                   |                                                                                       | <ul style="list-style-type: none"> <li>- Pooled sensitivity 86%</li> <li>- Pooled specificity 68%</li> </ul>                                                                                                                                                                                                                                                                                                                                                                                                                              |                                                                           |                                                                                                                        |
| Abrishami et al, 2010 (99)  | Systematic review and Meta-analysis | 2a Cohort studies | To identify and evaluate the available questionnaires for screening OSA.              | <p>10 studies (n =1484 patients) met the inclusion criteria. The Berlin questionnaire was the most common questionnaire (four studies) followed by the Wisconsin sleep questionnaire (two studies).</p> <p>In “sleep disorder patients”:</p> <ul style="list-style-type: none"> <li>- Pooled sensitivity 72.0%</li> <li>- pooled specificity 61.0%.</li> </ul> <p>In “patients without history of sleep disorders”:</p> <ul style="list-style-type: none"> <li>- Pooled sensitivity 77.0%</li> <li>- pooled specificity 53.0%.</li> </ul> | STOP and STOP-Bang questionnaires had the highest methodological quality. | Inconsistency in results could be due to studies with heterogeneous design (population, questionnaire type, validity). |
| Nishiyama et al, 2014 (100) | Meta-analysis                       | 2a Cohort studies | To summarise the evidence for criterion validity of the ESS for the diagnosis of OSA, | N=367 patients, no detailed anthropometric data for the whole group.                                                                                                                                                                                                                                                                                                                                                                                                                                                                      | <p>For ESS&gt;10 :</p> <p>AHI≥5 :</p> <p>Sensitivity : 32%</p>            | ESS not highly accurate for predicting OSA. ESS has no value in identifying OSA.                                       |



|                           |                                     |                   |                                                                                                                                                                                         |                                                                                                                                                                                                                                                                                                                                                                                                                                                                                                                                                                                                                                                                            |                                                                                                                                |                                                                                             |
|---------------------------|-------------------------------------|-------------------|-----------------------------------------------------------------------------------------------------------------------------------------------------------------------------------------|----------------------------------------------------------------------------------------------------------------------------------------------------------------------------------------------------------------------------------------------------------------------------------------------------------------------------------------------------------------------------------------------------------------------------------------------------------------------------------------------------------------------------------------------------------------------------------------------------------------------------------------------------------------------------|--------------------------------------------------------------------------------------------------------------------------------|---------------------------------------------------------------------------------------------|
|                           |                                     |                   | PLMD, RBD, and narcolepsy, by meta-analysis, combining the current and previous studies.                                                                                                |                                                                                                                                                                                                                                                                                                                                                                                                                                                                                                                                                                                                                                                                            | Specificity : 69%<br><br>AHI $\geq$ 15 :<br><br>Sensitivity : 31%<br><br>Specificity : 64%                                     |                                                                                             |
| Nagappa et al, 2015 (101) | Systematic review and Meta-analysis | 2a Cohort studies | To determine the effectiveness of STOP-Bang for screening patients suspected of having OSA and to predict its accuracy in determining the severity of OSA in the different populations. | 17 studies (n=9206 patients) were included for systematic review (11 studies in sleep clinic populations, 3 studies in surgical population, 1 study in general population, 1 study in highway bus drivers, and 1 study in renal failure patients).<br><br>Pooled predictive parameters of STOP-Bang $\geq$ 3 as cut-off in sleep clinic population (for AHI $\geq$ 5 ; AHI $\geq$ 15 ; AHI $\geq$ 30)<br><br>- sensitivities : 90%, 94%, 96%<br><br>- Specificities : 49% ; 34%, 25%<br><br>Pooled predictive parameters of STOP-Bang $\geq$ 3 as cut-off in surgical population (for AHI $\geq$ 5 ; AHI $\geq$ 15 ; AHI $\geq$ 30)<br><br>- sensitivities : 84%, 91%, 96% | The STOP-Bang questionnaire has been validated as an excellent screening tool for OSA in sleep clinic and surgical population. | Data in other populations is limited (general population, drivers, chronic kidney disease). |

|                        |                                     |                   |                                                                                                                                                                    |                                                                                                                                                                                                                                                                                                                                                                                                                                                                                                                                                                                                                                                                                       |                                                                                                                                                                                                                                                                                                                                                       |                                                                                                                                                                                                                                                                                                                                                                                                    |
|------------------------|-------------------------------------|-------------------|--------------------------------------------------------------------------------------------------------------------------------------------------------------------|---------------------------------------------------------------------------------------------------------------------------------------------------------------------------------------------------------------------------------------------------------------------------------------------------------------------------------------------------------------------------------------------------------------------------------------------------------------------------------------------------------------------------------------------------------------------------------------------------------------------------------------------------------------------------------------|-------------------------------------------------------------------------------------------------------------------------------------------------------------------------------------------------------------------------------------------------------------------------------------------------------------------------------------------------------|----------------------------------------------------------------------------------------------------------------------------------------------------------------------------------------------------------------------------------------------------------------------------------------------------------------------------------------------------------------------------------------------------|
|                        |                                     |                   |                                                                                                                                                                    | - Specificities : 43% ; 32%, 29%                                                                                                                                                                                                                                                                                                                                                                                                                                                                                                                                                                                                                                                      |                                                                                                                                                                                                                                                                                                                                                       |                                                                                                                                                                                                                                                                                                                                                                                                    |
| Chiu et al, 2017 (102) | Systematic review and Meta-analysis | 2a Cohort studies | To investigate and compare the pooled sensitivity, specificity, and diagnostic odds ratio (DOR) among the BQ, SBQ, STOP, and ESS according to the severity of OSA. | <p>108 studies (n=47989 patients) met the inclusion criteria. The performance levels of the Berlin questionnaire, STOP-Bang questionnaire, STOP, and ESS in detecting OSA of various severity levels are:</p> <p>- for mild OSA:</p> <p>the pooled sensitivity levels were 76%, 88%, 87%, and 54%;</p> <p>the pooled specificity levels were 59%, 42%, 42%, and 65%.</p> <p>-for moderate OSA: the pooled sensitivity levels were 77%, 90%, 89%, and 47%;</p> <p>the pooled specificity levels were 44%, 36%, 32%, and 621%.</p> <p>-for severe OSA: the pooled sensitivity levels were 84%, 93%, 90%, and 58%;</p> <p>the pooled specificity levels were 38%, 35%, 28%, and 60%.</p> | <p>The sensitivity of the STOP-Bang questionnaire was higher than that of other questionnaires for detecting mild, moderate, and severe OSA. Compared with ESS, the STOP-Bang has limited value in screening out patients without OSA.</p> <p>The risk of bias in most domains was unclear, because of insufficient details in the reported data.</p> | <p>Sample size affected the results, i.e. lower sensitivity for the STOP and ESS in studies on &lt;200 compared to those on ≥200 subjects. The diagnostic properties of the questionnaires for some populations (e.g. Epworth in surgical patients, STOP-Bang in patients with cardiovascular and respiratory diseases, and STOP and ESS in community or general population) were unavailable.</p> |
| Senaratna et al,       | Systematic review and               | 2a                | To report the Berlin                                                                                                                                               | 35 studies met the inclusion criteria.                                                                                                                                                                                                                                                                                                                                                                                                                                                                                                                                                                                                                                                |                                                                                                                                                                                                                                                                                                                                                       | Need for consensus on consistent                                                                                                                                                                                                                                                                                                                                                                   |

|            |               |                |                                                                                                                                                                                                                                                                                         |                                                                                                                                                                                                                                                                                                                                                                                                                                                                                                                                                                                                                                                                                                                                               |                                                                                                                                                                                                                                                                                                                                                                                                                                   |
|------------|---------------|----------------|-----------------------------------------------------------------------------------------------------------------------------------------------------------------------------------------------------------------------------------------------------------------------------------------|-----------------------------------------------------------------------------------------------------------------------------------------------------------------------------------------------------------------------------------------------------------------------------------------------------------------------------------------------------------------------------------------------------------------------------------------------------------------------------------------------------------------------------------------------------------------------------------------------------------------------------------------------------------------------------------------------------------------------------------------------|-----------------------------------------------------------------------------------------------------------------------------------------------------------------------------------------------------------------------------------------------------------------------------------------------------------------------------------------------------------------------------------------------------------------------------------|
| 2017 (103) | Meta-analysis | Cohort studies | <p>questionnaire's diagnostic utility as measured against type-1 PSG. The sensitivity was higher when hypopnoea was defined as <math>\geq 3\%</math> oxygen desaturation rather than <math>&gt;4\%</math>. No such relationship with hypopnoea definition was seen for specificity.</p> | <p>In sleep clinic population : Pooled sensitivity ranged from 79% to 82%.</p> <p>Pooled specificity ranged from 32% to 39%.</p> <p>In patients with cardio- or cerebro-vascular disease or risk factors :</p> <p><i>Pooled sensitivity</i> ranged from 40% to 93%.</p> <p><i>Pooled specificity</i> ranged from 26% to 76%.</p> <p>In the general population :</p> <p>For an <math>AHI \geq 5</math> :</p> <p><i>Pooled sensitivity</i> ranged from 37% to 69%.</p> <p><i>Pooled specificity</i> ranged from 83% to 84%.</p> <p>For an <math>AHI \geq 10</math> :</p> <p><i>Pooled sensitivity</i> 79%</p> <p><i>Pooled specificity</i> 67%</p> <p>For an <math>AHI \geq 15</math> :</p> <p><i>Pooled sensitivity</i> ranged from 43% to</p> | <p>definitions for gold-standard PSG to measure and diagnose OSA. In addition, reporting the diagnostic utility for multiple reference standards and for multiple AHI thresholds could help make valid comparisons between different validation studies. More validation studies are needed using the Berlin questionnaire in primary care and in the general population (including comparison to other OSA screening tools).</p> |
|------------|---------------|----------------|-----------------------------------------------------------------------------------------------------------------------------------------------------------------------------------------------------------------------------------------------------------------------------------------|-----------------------------------------------------------------------------------------------------------------------------------------------------------------------------------------------------------------------------------------------------------------------------------------------------------------------------------------------------------------------------------------------------------------------------------------------------------------------------------------------------------------------------------------------------------------------------------------------------------------------------------------------------------------------------------------------------------------------------------------------|-----------------------------------------------------------------------------------------------------------------------------------------------------------------------------------------------------------------------------------------------------------------------------------------------------------------------------------------------------------------------------------------------------------------------------------|

|  |  |  |  |                                                                                                                                                                                                                                                                                                                                                                                                                                                                 |  |  |
|--|--|--|--|-----------------------------------------------------------------------------------------------------------------------------------------------------------------------------------------------------------------------------------------------------------------------------------------------------------------------------------------------------------------------------------------------------------------------------------------------------------------|--|--|
|  |  |  |  | <p>89%.</p> <p><i>Pooled specificity</i> ranged from 63% to 80%.</p> <p>In surgical population :</p> <p>For an AHI<math>\geq</math>5 :</p> <p><i>Pooled sensitivity</i> 69%</p> <p><i>Pooled specificity</i> 56%</p> <p>For an AHI<math>\geq</math>15 :</p> <p><i>Pooled sensitivity</i> 79%-82%</p> <p><i>Pooled specificity</i> 50%-62%</p> <p>For an AHI<math>\geq</math>30 :</p> <p><i>Pooled sensitivity</i> 87%</p> <p><i>Pooled specificity</i> 46%.</p> |  |  |
|--|--|--|--|-----------------------------------------------------------------------------------------------------------------------------------------------------------------------------------------------------------------------------------------------------------------------------------------------------------------------------------------------------------------------------------------------------------------------------------------------------------------|--|--|

Abbreviations : AHI: Apnoea hypopnoea index; BQ: Berlin Questionnaire; DOR: diagnostic odds ratio; ESS: Epworth Sleepiness Scale; OSA: Obstructive sleep apnoea; PLMD: Periodic limb movement disorder; PSG: Polysomnography; RBD: REM sleep behaviour disorder; SBQ: STOP-Bang questionnaire.

**Table e7. Summary of studies on driving simulators in normal subjects and untreated OSA patients**

| Author                     | Design               | EBM | Patient population                                                                                                                              | Simulator type. Test duration                                                         | Results                                                                                                                                                              | Comments                                                                                                                                                                                       |
|----------------------------|----------------------|-----|-------------------------------------------------------------------------------------------------------------------------------------------------|---------------------------------------------------------------------------------------|----------------------------------------------------------------------------------------------------------------------------------------------------------------------|------------------------------------------------------------------------------------------------------------------------------------------------------------------------------------------------|
| <i>Normal subjects</i>     |                      |     |                                                                                                                                                 |                                                                                       |                                                                                                                                                                      |                                                                                                                                                                                                |
| Pizza et al, 2004 (104)    | Observational cohort | 4   | Healthy volunteers (n=10, 5 men) after normal night and night with complete sleep deprivation. Actigraphy and MSLT, EDS assessed as SSS and VAS | Monotonic 30 min driving simulation and divided attention driving task (DADT), 30 min | The standard deviation of lane position, the mean RT, crash frequency and exceeding the speed limit correlated most highly with MSLT.                                | Driving simulation is suitable to evaluate sleepiness in normal subjects                                                                                                                       |
| Contardi et al, 2004 (105) | Observational cohort | 4   | Healthy subjects (n=10, 5 men). Before each driving task, sleepiness assessed by Stanford Sleepiness Scale (SSS) and Visual Analogue Scale      | Monotonic 30 min driving simulation task every 2 h                                    | Assessed the circadian variations of alertness in healthy subjects. Driving performances deteriorated or improved according to the circadian variation of alertness. | The standard deviation of lane position, comparing the differences among the 10 min blocks in each task is the parameter most significant for the evaluation of sleepiness in healthy subjects |

|                           |                          |   |                                                                                                       |                                                         |                                                                                                                                                                                                                                                                                                                                                                                                           |                                                                                    |
|---------------------------|--------------------------|---|-------------------------------------------------------------------------------------------------------|---------------------------------------------------------|-----------------------------------------------------------------------------------------------------------------------------------------------------------------------------------------------------------------------------------------------------------------------------------------------------------------------------------------------------------------------------------------------------------|------------------------------------------------------------------------------------|
|                           |                          |   | (VAS)                                                                                                 |                                                         |                                                                                                                                                                                                                                                                                                                                                                                                           |                                                                                    |
| Banks et al, 2005 (106)   | Observational cohort     | 4 | 20 healthy volunteers (9 men), partial sleep deprivation, and partial sleep deprivation plus alcohol. | AusEd simulator, 70 min                                 | Sleep latency on MWT was a reasonable predictor of simulator performance in sleepy alcohol-impaired normal subjects.                                                                                                                                                                                                                                                                                      |                                                                                    |
| Philip et al, 2005 (107)  | Observational cross over | 4 | Healthy men (n=12) studied after controlled habitual sleep (8 hours) or restricted sleep (2 hours)    | Real driving (1200 km) or simulated driving             | Fatigue can be equally studied in real and simulated environments, but reaction time and self-evaluation of sleepiness are more affected in a simulated environment. Real driving and driving simulators are comparable for measuring line crossings, but the effects are of higher amplitude in the simulated condition.                                                                                 | Although not in OSAS, important as comparison between a simulator and real driving |
| Hallvig et al, 2013 (108) | Observational            | 4 | Normal healthy subjects (n=10, 5 women) studied under both day and night driving conditions           | High fidelity moving base simulator versus real driving | Both for real and simulated driving, the response to night driving was rather similar for subjective sleepiness and sleep physiology. Lateral variability was more responsive to night driving in the simulator, while real driving at night involved a movement to the left in the lane and a reduction of speed, both effects being absent in the simulator. In absolute terms, simulators cause higher | Generalisations from simulators to real driving must be made with caution          |

|                           |               |   |                                                                                                                                                           |                              |                                                                                                                                                                                                                                                                                                                                                                                                                          |                                                                                                                                                                                |
|---------------------------|---------------|---|-----------------------------------------------------------------------------------------------------------------------------------------------------------|------------------------------|--------------------------------------------------------------------------------------------------------------------------------------------------------------------------------------------------------------------------------------------------------------------------------------------------------------------------------------------------------------------------------------------------------------------------|--------------------------------------------------------------------------------------------------------------------------------------------------------------------------------|
|                           |               |   |                                                                                                                                                           |                              | sleepiness levels than real driving.                                                                                                                                                                                                                                                                                                                                                                                     |                                                                                                                                                                                |
| <i>Untreated OSA</i>      |               |   |                                                                                                                                                           |                              |                                                                                                                                                                                                                                                                                                                                                                                                                          |                                                                                                                                                                                |
| Findley et al, 1989 (109) | Case control  | 4 | 12 untreated severe OSA, 12 controls                                                                                                                      | Steer Clear, 30 min          | OSA participants hit more obstacles than controls (44±52 vs 9±7). Follow up post-treatment (n=6): improved performance.                                                                                                                                                                                                                                                                                                  | Short communication                                                                                                                                                            |
| Findley et al, 1995 (110) | Case control  | 4 | 62 OSA (53 men); 12 age- and sex-matched controls and 10 age- and sex-matched volunteers, 10 narcolepsy patients. MVA information from legal authorities. | Steer Clear, 30 min          | OSA patients hit more obstacles ( $4.3 \pm 0.6\%$ [SEM]) than subjects without sleep apnoea ( $1.4 \pm 0.3\%$ ; $p < 0.05$ ) and volunteers ( $1.2 \pm 0.3\%$ ; $p < 0.05$ ). In OSA patients MVA rate was:<br>- 0.05 accident/driver/5 yr for a normal performance on Steer Clear (n=21);<br>- 0.20 accident/driver/5 yr for a poor performance (n=25)<br>- 0.38 accident/driver/5 yr for very poor performance (n=21). | Impaired vigilance as measured by Steer Clear is associated<br><br>with a high MVA rate in OSA patients. Simulator performance correlated with severity of SDB in OSA patients |
| George et al, 1996        | Observational | 4 | Twenty-one male OSA patients (age $49.3 \pm 12.7$ yrs; AHI                                                                                                | Driving simulation, DADT, 20 | OSA and narcoleptic patients performed worse than controls. Half of either patient group performed as well as controls. Only                                                                                                                                                                                                                                                                                             | Degree of impairment difficult to predict from                                                                                                                                 |

|                          |              |   |                                                                                                                               |                                                            |                                                                                                                                                                                                                                                                                                                                   |                                                                                                                   |
|--------------------------|--------------|---|-------------------------------------------------------------------------------------------------------------------------------|------------------------------------------------------------|-----------------------------------------------------------------------------------------------------------------------------------------------------------------------------------------------------------------------------------------------------------------------------------------------------------------------------------|-------------------------------------------------------------------------------------------------------------------|
| (111)                    | cohort       |   | 73 ±29); 21 age- and sex-matched controls, and 16 narcoleptics (12 males, age: 39.6 ±15.2 yrs). PSG followed by daytime MSLT. | min before each daytime nap                                | weak relationship between tracking and MSLT in either group.                                                                                                                                                                                                                                                                      | sleepiness alone                                                                                                  |
| George et al, 1996 (112) | Case control | 4 | 21 male OSA patients (same group as in previous article) and 21 age- and sex-matched control subjects. PSG followed by MSLT   | Driving simulation , DADT, 20 min, before each daytime nap | Patients performed much worse than control subjects in all measures, with the largest difference in tracking error (OSA: $228 \pm 145$ cm, controls: $71 \pm 31$ cm, $p < 1 \times 10^{-9}$ ). Half of the patients were worse than any control subject, some showed performance worse than control subjects impaired by alcohol. | MSLT and AHI explained less than 25% of the variance in tracking error, making individual prediction problematic. |
| Barbe et al, 1998 (43)   | Case control | 3 | 60 OSAS (AHI $58 \pm 3/h$ ) and 60 age- and sex-matched controls                                                              | Steer Clear, 30 min                                        | Patients had more MVA than controls (OR 2.3) and were more likely to have had $\geq 1$ accident (OR 5.2). No correlation between the degree of EDS, anxiety, depression, number of respiratory events, nocturnal hypoxemia, level of vigilance, or driving simulator performance and the risk of MVA in OSA patients.             | Marked as 3 for numerosity of the sample                                                                          |
| Findley et               | Case         | 4 | 31 patients with                                                                                                              | Steer                                                      | Patients had more collisions than control                                                                                                                                                                                                                                                                                         | The association of disorders                                                                                      |



|                              |              |   |                                                                                    |                                                                                          |                                                                                                                                                                                                                                                                                                                                                                                                                                                                                                                                                                                                                 |                                                                 |
|------------------------------|--------------|---|------------------------------------------------------------------------------------|------------------------------------------------------------------------------------------|-----------------------------------------------------------------------------------------------------------------------------------------------------------------------------------------------------------------------------------------------------------------------------------------------------------------------------------------------------------------------------------------------------------------------------------------------------------------------------------------------------------------------------------------------------------------------------------------------------------------|-----------------------------------------------------------------|
| al, 1999<br>(113)            | control      |   | untreated OSA (27 men), 16 patients with narcolepsy, and 14 healthy controls       | Clear, 30 min                                                                            | subjects at Steer Clear ( $p=0.006$ ). Inter-subject variability in errors among the narcoleptic patients was four-fold that of OSA patients, and 100-fold that of controls; the variance in errors among untreated OSA patients was 27 times that of controls. Differently from control subjects, showed no clear evidence of increasing collision errors with time-on-task (adjusted $R^2=0.22$ ), while OSA patients showed a trend toward vigilance decrement (adjusted $R^2=0.42$ , $p=0.097$ ), and narcolepsy patients evidenced a robust linear vigilance decrement (adjusted $R^2=0.87$ , $p=0.004$ ). | of excessive somnolence with escalating time-on-task decrements |
| Juniper et al, 2000<br>(114) | Case control | 4 | OSA patients ( $n=12$ , median ODI 41.1/h), controls ( $n=12$ , median ODI 0.8/h). | Driving simulator and DADT, 3 x 30 min drives with different parts of road ahead visible | Patients with OSA performed worse than controls under all three conditions, particularly when vision of the road was limited. OSA patients may be more impaired when road vision is restricted, eg fog                                                                                                                                                                                                                                                                                                                                                                                                          | Mechanistic study                                               |

|                              |                      |    |                                                                                                    |                                                              |                                                                                                                                                                                                                                                                                                                                                                                                                                           |                                                                                                                                                   |
|------------------------------|----------------------|----|----------------------------------------------------------------------------------------------------|--------------------------------------------------------------|-------------------------------------------------------------------------------------------------------------------------------------------------------------------------------------------------------------------------------------------------------------------------------------------------------------------------------------------------------------------------------------------------------------------------------------------|---------------------------------------------------------------------------------------------------------------------------------------------------|
| Risser et al, 2000 (115)     | Case control         | 4  | 15 OSAS and 15 controls                                                                            | Systems Technology, Inc. Driving Simulator (STISIM®), 60 min | The OSA group had significantly greater variability in lane position, steering rate, and speed than controls. The apnoea group also had more crashes, more numerous and longer EEG attention lapses. Except for speed and steering rate variability, these differences increased over the 60-min task. Measures of lane position variability and crash frequency were positively correlation with attention lapse frequency and duration. | Mechanistic study, suggesting that poorer driving performance and crashes are not entirely due to overt sleep, but inattention due to sleepiness. |
| Hack et al, 2001 (116)       | Case control         | 4  | 26 OSA patients and 12 controls, experimental conditions: sleep deprivation or alcohol consumption | Driving simulator and DADT, 90 min                           | Sleep deprived, alcohol and untreated OSA patients performed worse than controls. Performance in untreated OSA between alcohol intoxication and sleep deprivation                                                                                                                                                                                                                                                                         | Driving impairment in OSA more compatible with sleep deprivation that impaired motor or cognitive skills                                          |
| Turkington et al, 2001 (117) | Observational cohort | 2b | 150 patients (82% male) referred for sleep studies. Questionnaire about real world driving.        | Driving simulator and DADT, 20 min                           | Older age, female sex and self-reported alcohol consumption had greatest influence on simulator performance. Number of self-reported near miss accidents was independently associated with poor performance. Number of off road events on simulator independently associated with previous MVA. ESS independently associated with falling                                                                                                 | 100% of individuals who did not have an accident could be identified as opposed to only 10% of those who did.                                     |

|                          |                      |   |                                                                                                                                         |                                        |                                                                                                                                                                                                                                                                                                                                                                                                                                                                                                                                                                                                                                |                                                                                                                                                                                                                                              |
|--------------------------|----------------------|---|-----------------------------------------------------------------------------------------------------------------------------------------|----------------------------------------|--------------------------------------------------------------------------------------------------------------------------------------------------------------------------------------------------------------------------------------------------------------------------------------------------------------------------------------------------------------------------------------------------------------------------------------------------------------------------------------------------------------------------------------------------------------------------------------------------------------------------------|----------------------------------------------------------------------------------------------------------------------------------------------------------------------------------------------------------------------------------------------|
|                          |                      |   |                                                                                                                                         |                                        | asleep at the wheel (OR 1.21) and near miss accidents.                                                                                                                                                                                                                                                                                                                                                                                                                                                                                                                                                                         |                                                                                                                                                                                                                                              |
| Mazza et al, 2005 (118)  | Case control         | 4 | 20 OSA patients (AHI $45 \pm 22$ ) and 40 controls. MWT, sustained attention. Three separate test sessions                              | Driving simulator and DADT, 20 min     | OSA patients performed worse than controls in all tests at all times. Patients had a high number of off road events - ( $91 \pm 71$ vs $40 \pm 37/h$ , $p=0.01$ ). Nine out of 10 patients with $ESS < 10$ performed worse than controls in at least 1 test.                                                                                                                                                                                                                                                                                                                                                                   | No effect upon real life driving investigated. High number of events on DASS in controls                                                                                                                                                     |
| Pichel et al, 2006 (119) | Observational cohort | 4 | 129 subjects with suspected OSA, confirmed in 77 subjects (AHI $\leq 10/h$ : 17.2%, AHI between 10 and 30/h: 26.9%, AHI $> 30$ : 55.9%) | Steer Clear, 300 min; and DADT, 20 min | Poor tracking error performance was associated with female gender (OR 6.79, 95% CI 1.37-33.65, $P < 0.05$ ), alcohol intake (OR 3.32, 95% CI 1.03-10.63, $P < 0.05$ ), and accidents in the previous year (OR 5.84, 95% CI 1.33-25.68, $P < 0.05$ ). Poor reaction time was only associated with age (OR 1.12, 95% CI 1.03-1.21, $P < 0.01$ ). When all three performance measures were studied jointly, only reaction time was associated with self-reported dozing while driving (OR 5.39, 95% CI 1.10-26.32, $P < 0.05$ ), and irresistible tendency to fall asleep was associated with poor tracking error ( $P < 0.05$ ). | Performance on driving simulators associated with sleep complaints in OSA patients. Although these measures are not directly associated to MVA, they are associated to related circumstances, i.e., dozing and falling asleep while driving. |

|                           |                          |   |                                                                                                                                                                                              |                                                           |                                                                                                                                                                                                                                                           |                                                                             |
|---------------------------|--------------------------|---|----------------------------------------------------------------------------------------------------------------------------------------------------------------------------------------------|-----------------------------------------------------------|-----------------------------------------------------------------------------------------------------------------------------------------------------------------------------------------------------------------------------------------------------------|-----------------------------------------------------------------------------|
| Desai et al, 2006 (120)   | Cross over observational | 4 | 13 subjects with mild OSA (mean RDI 12/h) and 16 subjects without OSA. Performance and neurobehavioral testing after a normal night sleep and after a night of supervised sleep deprivation. | AusEd, 30 min                                             | Clear effects of sleep deprivation and time of day on performance, but no differences between groups. Perception of daytime sleepiness after sleep deprivation was blunted in OSA subjects compared to controls, despite similar performance decrements.  | Mechanistic                                                                 |
| Sagaspe et al, 2007 (121) | Observational cohort     | 4 | 30 males untreated OSAS (AHI 43±24/h). At MWT: 23.3% were sleepy, 43.4% fully alert.                                                                                                         | Driving simulator and DADT, 60 min                        | Significant effect of MWT group on standard deviation from middle of road. At post-hoc tests, the sleepy group had worse simulator performance than the fully alert group p =0.006. ESS, AHI, arousal index and TST did not predict simulator performance | Did not compare either MWT or simulator performance with real world driving |
| Boyle et al, 2008 (122)   | Observational cohort     | 4 | 24 patients with OSAS (male=12). Mean ESS 11, AHI not reported                                                                                                                               | SIREN simulator - high fidelity, front and rear views; 60 | Significant deterioration in vehicle control during microsleeps                                                                                                                                                                                           | Mechanistic study of effect of micro sleeps on driving performance          |

|                         |                      |   |                                                                                                   |                                                                      |                                                                                                                                                                                                                                                                                                                                                                                                                                    |                                                                                                                                          |
|-------------------------|----------------------|---|---------------------------------------------------------------------------------------------------|----------------------------------------------------------------------|------------------------------------------------------------------------------------------------------------------------------------------------------------------------------------------------------------------------------------------------------------------------------------------------------------------------------------------------------------------------------------------------------------------------------------|------------------------------------------------------------------------------------------------------------------------------------------|
|                         |                      |   |                                                                                                   | min                                                                  |                                                                                                                                                                                                                                                                                                                                                                                                                                    |                                                                                                                                          |
| Pizza et al, 2008 (123) | Observational cohort | 4 | 30 OSAS patients (29 men, AHI $48 \pm 23/h$ ), ESS $12.4 \pm 4.4$ , ESS > 11 in 56% of the sample | Driving simulator and DADT, 30 min                                   | Subjective and objective sleepiness correlated with driving performance on the simulator. The most significant correlates of sleepiness were: lane position variability and crash data. Driving simulation data significantly different only when patients were classified on the basis of the ESS score. Patients with an AHI > 40 and patients reporting sleepiness while driving in the past year had worse driving performance | Conclusions: driving simulation+DADT is a suitable objective tool to detect sleepiness in OSAS patients.                                 |
| Tassi et al, 2008 (124) | Case control         | 4 | 12 OSAS and 8 healthy controls, 6 driving sessions during a 24-h period of sustained wakefulness. | Driving simulation with medium traffic density, ie not so monotonous | Compared to controls, OSA patient showed difficulties in speed adjustment and showed a more cautious behaviour than controls. This was thought to be the result of a bigger effort to stay awake,                                                                                                                                                                                                                                  | Mechanistic study<br><br>Poor sleep indices were correlated to increased theta and beta activities, as well as to more cautious behavior |

|                         |                      |   |                                                                                                                        |                                                                              |                                                                                                                                                                                                                                                                                                                                                                                                                                                                                                                                                                                                       |                                                                                          |
|-------------------------|----------------------|---|------------------------------------------------------------------------------------------------------------------------|------------------------------------------------------------------------------|-------------------------------------------------------------------------------------------------------------------------------------------------------------------------------------------------------------------------------------------------------------------------------------------------------------------------------------------------------------------------------------------------------------------------------------------------------------------------------------------------------------------------------------------------------------------------------------------------------|------------------------------------------------------------------------------------------|
| Wong et al, 2008 (125)  | Case control         |   | Untreated OSA patients (n=8, mean AHI 49.8/h, mean ESS 11.9) and young healthy controls (n=9, AHI 4.5/h, mean ESS 7.3) | AusEd, 30 min, and 10-min PVT every 2 h during 40 h of sustained wakefulness | Performance and sleepiness worsened over time in both groups. No difference between OSA and controls in any test.                                                                                                                                                                                                                                                                                                                                                                                                                                                                                     |                                                                                          |
| Pizza et al, 2009 (126) | Observational cohort | 4 | 24 patients with OSAS. MSLT & MWT and driving simulation on 2 different days.                                          | STISIM simulator, 30 min                                                     | <p>Lane position variability and crash occurrence correlated with sleep latency on the MSLT and more significantly on the MWT. Patients reporting EDS or a history of car crashes showed poor performance on the driving simulator.</p> <p>Ability of the simulated driving test to detect:</p> <p>-sleepy subjects compared with MWT (area under the ROC curve: 0.870 for crashes, 0.958 for lane position variability;</p> <p>fully alert subjects on the MWT: the majority of the parameters were significant (area under the ROC Curve: 0.9 for crashes, 0.798 for lane position variability.</p> | Important study showing relationship between sleepiness and simulator performance in OSA |

|                           |                                       |   |                                                                                                                                                                                                 |                                 |                                                                                                                                                                                                                                                                                                                                                                                                                                                                                                                                                                                                    |                                                                                                                   |
|---------------------------|---------------------------------------|---|-------------------------------------------------------------------------------------------------------------------------------------------------------------------------------------------------|---------------------------------|----------------------------------------------------------------------------------------------------------------------------------------------------------------------------------------------------------------------------------------------------------------------------------------------------------------------------------------------------------------------------------------------------------------------------------------------------------------------------------------------------------------------------------------------------------------------------------------------------|-------------------------------------------------------------------------------------------------------------------|
| Tippin et al, 2009 (127)  | Case control                          | 4 | 25 OSA (18 males, AHI $21.2 \pm 19.9$ , ESS 12) and 41 controls (21 males). PSG and MSLT                                                                                                        | High fidelity simulator, 60 min | OSA patients showed reduced vigilance particularly for peripheral targets, and were sleepier at the end of the drive. Sleepiness correlated with worse performance only in OSA patients. No correlation between vigilance performance and ESS, SSS, AHI or mean sleep latency. Hit rate correlated with min SaO <sub>2</sub> %. Females had worse performance                                                                                                                                                                                                                                      | Mechanistic study. Fatigue related decline in vigilance for peripheral targets predicted by increased sleepiness. |
| Vakulin et al, 2009 (128) | Repeated-measures observational study | 4 | 38 untreated OSAS (28 males, AHI $46.4 \pm 21.7$ /h, ESS $9.3 \pm 5.3$ ) and 20 controls, studied under 3 conditions in random order: unrestricted sleep, sleep restricted to 4 h, and alcohol. | AusEd, 90 min                   | In OSA patients, increased steering deviation and significantly greater deterioration over time compared to controls. The effects of sleep restriction and alcohol were approximately 40% greater in patients with OSA. OSA patients crashed more frequently than controls, especially after sleep restriction and alcohol. In OSA patients prolonged eye closure for $\geq 2$ s and microsleeps were significant predictors of driving performance. Braking reaction time was slower after sleep restriction than after normal sleep but not after alcohol consumption, without group differences | Mechanistic study. No correlation with real life accidents                                                        |
| Pizza et al, 2011 (129)   | Observational cohort                  | 4 | OSAS patients (n=43, male, mean AHI $55 \pm 16$ ). PSG and                                                                                                                                      | STISIM, 30 min                  | 47% had crashed in previous year and considered sleepiness a major factor. Higher ESS associated with earlier crashes                                                                                                                                                                                                                                                                                                                                                                                                                                                                              | Poorer simulator performance in patients at risk who continued to drive                                           |

|                             |                                       |    |                                                                                                            |                                       |                                                                                                                                                                                                                                                                                                                                                                                                                                                                                                                                                                                                             |                                                                                                                                                                                                                            |
|-----------------------------|---------------------------------------|----|------------------------------------------------------------------------------------------------------------|---------------------------------------|-------------------------------------------------------------------------------------------------------------------------------------------------------------------------------------------------------------------------------------------------------------------------------------------------------------------------------------------------------------------------------------------------------------------------------------------------------------------------------------------------------------------------------------------------------------------------------------------------------------|----------------------------------------------------------------------------------------------------------------------------------------------------------------------------------------------------------------------------|
|                             |                                       |    | MWT                                                                                                        |                                       | on simulator. 65% continued to drive while sleepy. Within this subgroup (“risky behavior”), patients who reported a crash were sleepier according to ESS (MWT $p=0.0682$ ) and crashed more frequently and sooner than those who did not report a crash.                                                                                                                                                                                                                                                                                                                                                    | (advising about driving not an issue in those who have chosen not to drive anyway). Simulators only recommended as a research tool.                                                                                        |
| Filtiness et al, 2011 (130) | Case control                          | 4  | 19 CPAP-treated male patients and 20 male controls, normal night's sleep and sleep restriction to 5 hours. | Realistic car simulator, 2 hour       | After a normal night’s sleep, patients and controls showed similar driving performance and ability to assess the levels of their own sleepiness, with both groups driving ‘safely’ for approximately 90 min. After sleep restriction, patients had a significantly shorter (65 min) safe driving time and had to apply more compensatory effort to maintain their alertness compared with controls. They also underestimated the enhanced sleepiness. There were generally close associations between subjective sleepiness, likelihood of a major lane deviation and EEG changes indicative of sleepiness. | Mechanistic study. With a normal night’s sleep, effectively treated older men with OSA drive as safely as healthy men of the same age. However, after restricted sleep, driving impairment is worse than that of controls. |
| Ghosh et al, 2012 (131)     | Observational cohort - derivation and | 2b | Exploratory cohort $n=72$ , validation $n=133$ . All with OSAS of sufficient                               | PC based version of a fully immersive | 32% completed one hour drive without incident, 22% failed, 46% indeterminate. Prediction models using standard deviation of lane position (SDLP) $\pm$ reaction                                                                                                                                                                                                                                                                                                                                                                                                                                             | . More credible than other simulators a third of high risk group could complete approx one hour of                                                                                                                         |



|                             |                                                          |   |                                                                                                                                            |                                                                                 |                                                                                                                                                                                                                                                                                                                |                                                                                                                                                                                       |
|-----------------------------|----------------------------------------------------------|---|--------------------------------------------------------------------------------------------------------------------------------------------|---------------------------------------------------------------------------------|----------------------------------------------------------------------------------------------------------------------------------------------------------------------------------------------------------------------------------------------------------------------------------------------------------------|---------------------------------------------------------------------------------------------------------------------------------------------------------------------------------------|
|                             | validation of model to protect task failure on simulator |   | severity to warrant a trial of CPAP. Mean ESS 13, ODI 35.                                                                                  | simulator                                                                       | time at an event could predict those who would fail test (sensitivity 82%, specificity 96%). Results confirmed in validation cohort. Task failure (crash, major driving incident) could be predicted from continuously measured SDLP, but driving simulator performance did not predict MVA risk in real life. | "motorway driving" without incident. Use of continuous variable useful in that predicts the person who should have failed but "got away with it" and can be used for repeated testing |
| Gieteling et al, 2012 (132) | Case control                                             | 4 | Patients with periodic leg movement disorder (PLMD, n=16), OSAS (n=18, mean AHI 47.9/h) and controls (n=16). 24-h PSG                      | 25 minute task. PC version of simulator developed by Brouwer et al (refs 20-21) | Decreased performance in patients compared to controls. Trend for worse performance in OSA compared to PLMD patients. Severity of disorder unrelated to performance.                                                                                                                                           | At start patients and controls performed similarly, but patient performance decreased clearly with time.                                                                              |
| Philip et al, 2013 (133)    | Case control                                             | 4 | 19 patients with idiopathic hypersomnolence or narcolepsy, 17 OSA (AHI: $21.5 \pm 7.5$ ) and 14 controls. MWT (40 min, 4 times during day) | Real car driving simulator, 40 min                                              | 4 groups based on MWT, pathological (sleep latency 0-19 min), intermediate (20-33 min), alert (34-40 min) and control (>34 min). Patients with pathological sleep latency had significantly more inappropriate line crossings compared to other groups.                                                        |                                                                                                                                                                                       |

|                             |                      |   |                                                                                                                                                                                                                       |                                  |                                                                                                                                                                                                                                                                                                                                                                                                                                                                                                            |                                                                                                                                                                        |
|-----------------------------|----------------------|---|-----------------------------------------------------------------------------------------------------------------------------------------------------------------------------------------------------------------------|----------------------------------|------------------------------------------------------------------------------------------------------------------------------------------------------------------------------------------------------------------------------------------------------------------------------------------------------------------------------------------------------------------------------------------------------------------------------------------------------------------------------------------------------------|------------------------------------------------------------------------------------------------------------------------------------------------------------------------|
| Vakulin et al, 2014 (134)   | Observational study  |   | Untreated OSA patients (n=35) undergoing anthropometric, clinical, and neurobehavioral investigations. Patients studied under 3 conditions in random order: unrestricted sleep, sleep restricted to 4 h, and alcohol. | AusEd,90 min                     | Based on steering deviation data collected in 20 normal controls (mean±SD 36.5±9.2 cm), OSA patients were classified as “resilient” drivers (steering deviation<54.6 cm) or “vulnerable” drivers (steering deviation≥54.6 cm, n=15, 38% of the sample). 12 OSA patients experienced at least 1 crash, 11 of them were “vulnerable” drivers. At multivariate analysis, only hours of driving per week (OR 0.69) and the auditory event related potential P2 (OR 1.34) predicted “vulnerable” driver status. | The majority of OSA patients (62%) performed well even after sleep deprivation or alcohol.                                                                             |
| Dermidogen et al, 2015 (11) | Observational cohort | 4 | 282 commercial drivers Psycho technical assessment system including driving simulation. 30 at high risk for OSA.                                                                                                      | Simulator not clearly described. | 47% of the subjects at high risk for OSA failed early reaction time test compared with 28% low risk (p = 0.03). Obese drivers failed the peripheral vision test (p = 0.02). ESS was higher for drivers with history of MVA when compared to those without (p = 0.02). No correlation between ESS and simulator performance.                                                                                                                                                                                | Cognitive psychomotor functions can be impaired in obese subjects and in subjects at high risk for OSA. Such groups should take the battery of tests used in the study |
| Vakulin et al, 2016 (135)   | Observational cohort | 4 | 76 OSAS patients (81% male, AHI 29.8 ± 25.0/h). PSG and quantitative EEG markers                                                                                                                                      | AusEd                            | Increased EEG power associated with worse driving performance (steering deviation). No relationships with clinical metrics, eg apnoea index, arousals, oxygen desaturation.                                                                                                                                                                                                                                                                                                                                | Mechanistic study                                                                                                                                                      |

|                            |                   |   |                                                                                                                                                                      |                                                                                                  |                                                                                                                                                                                                                                                                                         |                                                                                                                                                                                                           |
|----------------------------|-------------------|---|----------------------------------------------------------------------------------------------------------------------------------------------------------------------|--------------------------------------------------------------------------------------------------|-----------------------------------------------------------------------------------------------------------------------------------------------------------------------------------------------------------------------------------------------------------------------------------------|-----------------------------------------------------------------------------------------------------------------------------------------------------------------------------------------------------------|
| May et al, 2016 (136)      | Case control      | 4 | Community volunteers (n=45) in whom screening indicated likely OSA (mean AHI 16.3, mean ESS 8.2). Divided into OSA (> 15 / hr) and normal (<10 per hr and ESS < 10). | 60 minute motorway . Moderate fidelity simulator – e.g. real car seat, feedback from pedals etc. | Performance similar initially but degraded more rapidly in the OSA patients                                                                                                                                                                                                             | Mechanistic study. Suggests that even in individuals with milder OSA, ie not sufficient to seek medical advice, driving still impaired. 89% of participants did not crash.                                |
| Cross et al, 2017          | Case control      | 4 | Old subjects with MCI (n=19) and age-matched controls (n=23). Cognitive tests, 10-min PVT, and driving simulation obtained before PSG                                | AusEd, 30 min                                                                                    | Crashes during driving simulation in 26% of controls and 42% of MCI patients. Poor performance associated with TMT-B in MCI patients only. Similar SDB in both groups, but markers of poor sleep and hypoxemia affected performance only in MCI subjects                                | Both MCI and control groups had no clinical symptoms of SDB.                                                                                                                                              |
| Schreier et al, 2017 (137) | Systematic review | 1 | 12 studies in sleepy individuals (OSA, narcolepsy or sleep deprived normals) containing both simulated and real driving data were                                    | n/a                                                                                              | In general, simulated driving did not reliably predict accidents; especially not on an individual level, despite the modest relationship between simulated and real road test driving performance. Limitations: small sample size, selection, publication and recall bias, “borderline” | The authors concluded that the severity of sleepiness is most likely not the critical factor leading to accidents, but rather the perception of sleepiness and the way that the individual responds to it |

|  |  |  |                                                                                                  |  |                                                     |                                                            |
|--|--|--|--------------------------------------------------------------------------------------------------|--|-----------------------------------------------------|------------------------------------------------------------|
|  |  |  | included in the review. Driving simulator most frequently used. Duration generally 20 to 30 min. |  | nature of some driving simulators (eg Steer Clear). | (the review did not provide any evidence to support this). |
|--|--|--|--------------------------------------------------------------------------------------------------|--|-----------------------------------------------------|------------------------------------------------------------|

Abbreviations: AHI: Apnoea hypopnoea index; CPAP: continuous positive airway pressure; DADT: divided attention driving task; DASS: divided attention driving simulators; EEG; electroencephalogram; EDS: excessive daytime sleepiness; ESS: Epworth Sleepiness Scale; MCI: Mild cognitive impairment; MSLT: mean sleep latency test; MVA: motor vehicle accidents; MWT: Maintenance of Wakefulness Test; ODI; oxygen desaturation index; OSA: Obstructive sleep apnoea; OSAS: Obstructive sleep apnoea syndrome; PLMD: Periodic limb movement disorder; PSG: Polysomnography; PVT: Psychomotor vigilance test; RT: response time; RDI: Respiratory Disturbance Index; SDB: Sleep Disorder Breathing; SDLP: standard deviation of lane position; SSS: Stanford Sleepiness Scale; TMT: Trail Making Test Parts; TST: Total sleep time; VAS: Visual analogue scale.

**Tablee8.Summary of studies on driving simulators in CPAP-treated OSA patients (n=12)**

| Author                   | Design               | EBM | Patient population                                                                                                                                                                                                   | Simulator type. Test duration             | Results                                                                                                                                                                                                                         | Comments                                                                                                                                                                                 |
|--------------------------|----------------------|-----|----------------------------------------------------------------------------------------------------------------------------------------------------------------------------------------------------------------------|-------------------------------------------|---------------------------------------------------------------------------------------------------------------------------------------------------------------------------------------------------------------------------------|------------------------------------------------------------------------------------------------------------------------------------------------------------------------------------------|
| George et al, 1997 (138) | Observational cohort | 4   | OSA patients (n=17 males, AHI 73.0 $\pm$ 28.9) restudied 1-12 months (mean 9.2 $\pm$ 4.2) after initiating CPAP.18 age- and sex-matched controls also retested 8.4 $\pm$ 3.4 months after initial test. PSG and MSLT | DADT, 20 min                              | Untreated patients with OSA, who performed much worse than controls in all measures, improved significantly on all measures of performance, particularly in tracking error which rnormalised in all but one patient after CPAP. | Improvement in tracking error was highly correlated with improvement in sleepiness (r = 0.65).                                                                                           |
| Hack et al, 2000 (139)   | RCT                  | 1b  | OSA patients (n=59, male, ODI 26 to 35, ESS 15). CPAP or sham for one month cross over.                                                                                                                              | Very simple graphics DASS, approx 30 min. | Therapeutic CPAP improved SD of steering position and reaction time to target stimuli                                                                                                                                           | Off road events still high (9/hour) after one month therapeutic CPAP. Study shows an important effect of CPAP, but does not address issue of simulator as a tool for assessing MVA risk. |

|                              |                      |    |                                                                                                                                                                                                                          |                                    |                                                                                                                            |                                                                |
|------------------------------|----------------------|----|--------------------------------------------------------------------------------------------------------------------------------------------------------------------------------------------------------------------------|------------------------------------|----------------------------------------------------------------------------------------------------------------------------|----------------------------------------------------------------|
| Kingshott et al, 2000 (140)  | Observational cohort | 4  | OSA patients (n=62) at baseline and after 6 months of CPAP treatment                                                                                                                                                     | Steer Clear, 30 min                | Task performance improved with CPAP treatment. AHI was a poor predictor of performance.                                    |                                                                |
| Munoz et al, 2000 (141)      | Case control         | 2b | OSA patients (n=80) before and after 1year CPAP. Controls (n=80)                                                                                                                                                         | Steer Clear, 30 min                | Prior to treatment task performance was significantly worse in OSA compared with controls. Performance improved with CPAP. |                                                                |
| Turkington et al, 2004 (142) | case control         | 4  | 18 severe OSAS patients before and on days 1, 3 and 7 after starting CPAP, and restudied on days 1, 3 and 7 after CPAP interruption. 18 untreated severe OSAS patients studied on the simulator at the same time points. | Driving simulator and DADT, 20 min | Performance improved rapidly after CPAP started, and the effect was sustained for up to a week after CPAP withdrawal       | No effect upon real life driving investigated                  |
| Orth et al, 2005 (143)       | Observational cohort |    | 31 patients with OSAS (AHI: $24.8 \pm 21.5$ ) before, and                                                                                                                                                                | Tests of vigilance, alertness and  | Divided attention and alertness improved significantly during CPAP, vigilance remained unchanged. However, accident        | Neuropsychiatric tests of 1. vigilance 2. alertness 3. divided |

|                           |              |    |                                                                                                                                         |                                                                                           |                                                                                                                                                                                                                                                                                                                                                                                                                                                                         |                                                                                                               |
|---------------------------|--------------|----|-----------------------------------------------------------------------------------------------------------------------------------------|-------------------------------------------------------------------------------------------|-------------------------------------------------------------------------------------------------------------------------------------------------------------------------------------------------------------------------------------------------------------------------------------------------------------------------------------------------------------------------------------------------------------------------------------------------------------------------|---------------------------------------------------------------------------------------------------------------|
|                           |              |    | after 2 and 42 days of CPAP                                                                                                             | divided attention - all important in driving. Tested separately NOT using a simulator     | frequency (before therapy: $2.7 \pm 2.0$ ; 2 days after CPAP: $1.5 \pm 1.4$ ; 42 days after CPAP: $0.9 \pm 1.3$ ) and frequency of concentration faults (before therapy: $12.4 \pm 5.1$ ; 2 days after CPAP: $6.5 \pm 3.9$ ; 42 days after CPAP: $4.9 \pm 3.3$ ) decreased during simulated driving after therapy. No relationship between accident frequency, concentration faults and daytime sleepiness (ESS), and PSG or neuropsychological findings, respectively. | attention. Did not use a simulator                                                                            |
| Mazza et al, 2006 (144)   | Case control | 4  | Twenty patients with OSAS (18 males) and 20 non-obese and non-snoring control subjects (17). Ten patients restudied after 3 months CPAP | Real car - Minotaure - tests ability to respond to an aquatic obstacle. Also DADT, 20 min | Much longer reaction times in OSA than in controls, with lengthening of the vehicle stopping distance of 8.8 m at 40 km/hr and twice the number of collisions. No objective sleepiness or selective and sustained attention deficits. Divided attention deficits did not predict real driving impairment. After CPAP treatment, no difference between patients and controls regarding driving and attention performances.                                               | Test of reaction time in a real car. Driving simulator performance did not predict what happened in real car. |
| Hoekema et al, 2007 (145) | RCT          | 2b | 20 OSAS and 16 controls. Short term RCT comparing oral appliance with CPAP                                                              | DASS, 25 min                                                                              | At baseline, total lapses of attention were greater in patients than controls. No difference after 2 to 3 months oral appliance compared with CPAP.                                                                                                                                                                                                                                                                                                                     |                                                                                                               |

|                                |                                            |   |                                                                                                                                                                                         |                                                          |                                                                                                                                                                                                                                                                                                                                                                                                                                                 |                                                                                                           |
|--------------------------------|--------------------------------------------|---|-----------------------------------------------------------------------------------------------------------------------------------------------------------------------------------------|----------------------------------------------------------|-------------------------------------------------------------------------------------------------------------------------------------------------------------------------------------------------------------------------------------------------------------------------------------------------------------------------------------------------------------------------------------------------------------------------------------------------|-----------------------------------------------------------------------------------------------------------|
| Antonopoulos et al, 2011 (146) | Meta-analysis to assess the effect of CPAP | 1 | Ten studies on real accidents (1221 patients), five studies on near miss accidents (769 patients) and six studies on the performance in driving simulator (110 patients) were included. | n/a                                                      | Significant reduction in real accidents and near miss accidents in CPAP-treated patients. Significant reduction in accident-related events also observed in the driving simulator. NNT equal to five patients, whereas for near miss accidents, the NNT was two patients. For near miss accidents, meta-regression analysis suggested that CPAP seemed more effective in patients reporting higher baseline accident rates.                     | Sizeable protective effect of nCPAP on road traffic accidents, both in real life and virtual environment. |
| Vakulin et al, 2011 (147)      | Case control                               | 4 | 11 OSAS patients and 9 controls before and after 3 months CPAP                                                                                                                          | AusEd, 90 min                                            | Simulator driving parameters of steering deviation, braking reaction time and crashes were measured at baseline and after approximately 3 months. At baseline, OSAS subjects had significantly greater steering deviation compared to controls. Following CPAP, steering deviation improved in OSA group, but no significant changes were observed in controls. Steering deviation in the OSA group after CPAP remained higher than in controls | Mechanistic - shows effect of CPAP. No real life correlation                                              |
| Fitness et al, 2012 (148)      | Observational cohort                       | 4 | 11 long-term CPAP treated patients with OSAS. One night after normal CPAP, one night                                                                                                    | Two-hour test on immobile car with full size interactive | CPAP withdrawal for one night increased sleep disturbance and lead to significantly more instance a shorter safe driving duration and greater subjective sleepiness. This was confirmed by increased EEG beta                                                                                                                                                                                                                                   | Mechanistic study suggesting that compliance every night was crucial for                                  |



|                         |                      |   |                                                                                       |                                                                            |                                                                                                                                                                                                                                                                                                                                       |              |
|-------------------------|----------------------|---|---------------------------------------------------------------------------------------|----------------------------------------------------------------------------|---------------------------------------------------------------------------------------------------------------------------------------------------------------------------------------------------------------------------------------------------------------------------------------------------------------------------------------|--------------|
|                         |                      |   | after no CPAP.                                                                        | computer generated road projection. Audible feedback from "rumble" strips. | activity, i.e., more compensatory effort was being applied. There was a highly significant correlation between subjective and EEG measures of sleepiness.                                                                                                                                                                             | safe driving |
| Ghosh et al, 2015 (149) | Observational cohort | 4 | OSAS patients of sufficient severity to warrant a trial of CPAP. Mean ESS 12, ODI 24. | PC based version of a fully immersive simulator                            | Trend towards failing the simulator test in patients who had a MVA in real life in the last 3 years (OR 2, p=0.09). Logistic regression analysis showed only admitting to taking a break less than an hour into long drives remained significant, but the predictive power was low (ROC area under the curve 0.59, 95% CI 0.47–0.71). |              |

Abbreviations: AHI: Apnoea hypopnoea index; CPAP: continuous positive airway pressure; DADT: divided attention driving task; DASS: divided attention driving simulators; ESS: Epworth Sleepiness Scale; MSLT: mean sleep latency test; MVA: motor vehicle accidents; NNT: numbers needed to treat; ODI; oxygen desaturation index; OSA: Obstructive sleep apnoea; OSAS: Obstructive sleep apnoea syndrome; PSG: Polysomnography; SD: standard deviation.

**Table e9. Meta-analyses on effectiveness of continuous positive airway pressure (CPAP) treatment in obstructive sleep apnoea (OSA) among commercial and non-commercial motor vehicle drivers**

| Author                                                                                                                                                                                                 | Design                              | EBM                                           | Objectives and Patient population                                                                                                                                                                                                                                                 | Results                                                                                                                                                        | Comments                                                                                                                                                                | Methodology                                                                                                                                                                                                                                                                                                                                                                       | Observations                                                                                                                                                                                                                                                                                                                                               |
|--------------------------------------------------------------------------------------------------------------------------------------------------------------------------------------------------------|-------------------------------------|-----------------------------------------------|-----------------------------------------------------------------------------------------------------------------------------------------------------------------------------------------------------------------------------------------------------------------------------------|----------------------------------------------------------------------------------------------------------------------------------------------------------------|-------------------------------------------------------------------------------------------------------------------------------------------------------------------------|-----------------------------------------------------------------------------------------------------------------------------------------------------------------------------------------------------------------------------------------------------------------------------------------------------------------------------------------------------------------------------------|------------------------------------------------------------------------------------------------------------------------------------------------------------------------------------------------------------------------------------------------------------------------------------------------------------------------------------------------------------|
| Patil et al, 2019 (150)<br><br>Treatment of Adult Obstructive Sleep Apnea With Positive Airway Pressure: An American Academy of Sleep Medicine Systematic Review, Meta-Analysis, and GRADE Assessment. | Systematic Review and Meta-analysis | 2b, 3b<br><br>Cohort and case-control studies | Non-commercial motor vehicle operators.<br><br>Participants had predominantly moderate to severe OSA and were self-reportedly sleepy, ESS or another tool, or data was not reported.<br><br>10 non-randomised studies with pre- and post-CPAP assessment of MVC by self-report or | A significant risk reduction following treatment [ mean crash rate risk ratio of 0.3 (95% CI: 0.2 to 0.4)], which was considered to be clinically significant. | The analyses suggest that CPAP use results in a reduction in crash rates in adults with OSA as assessed by both objective MVC data and self-report from questionnaires. | PubMed and Embase databases<br><br>October 2013 to February 2018<br><br>RCTs, observational studies,<br><br>adult patients with OSA, study sample size $\geq 10$ ,<br><br>PAP therapy for at least 4 weeks (other PICO),<br><br>Head-to-head studies of different PAP devices or PAP versus control condition, and<br><br>reporting of at least one relevant outcome of interest. | No data reported about compliance even some studies had this data<br><br>The quality of evidence for MVC ranged from low to moderate due to issues of study design ascertainment of the outcome.<br><br>Follow-up varied ranging up to 2 years before enrollment to 6 years after (range 2–6 years) or prospective follow-up after enrollment between 6–12 |

|                                                                                                                                                                                          |                                     |                                               |                                                                                                                                                                                                                                         |                                                                                                                                                                                                                          |                                                                                                                                                                                                              |                                                                                                                                                                                                                                                                                             |                                                                                                                                                                                                                                                         |
|------------------------------------------------------------------------------------------------------------------------------------------------------------------------------------------|-------------------------------------|-----------------------------------------------|-----------------------------------------------------------------------------------------------------------------------------------------------------------------------------------------------------------------------------------------|--------------------------------------------------------------------------------------------------------------------------------------------------------------------------------------------------------------------------|--------------------------------------------------------------------------------------------------------------------------------------------------------------------------------------------------------------|---------------------------------------------------------------------------------------------------------------------------------------------------------------------------------------------------------------------------------------------------------------------------------------------|---------------------------------------------------------------------------------------------------------------------------------------------------------------------------------------------------------------------------------------------------------|
|                                                                                                                                                                                          |                                     |                                               | objective reports.                                                                                                                                                                                                                      |                                                                                                                                                                                                                          |                                                                                                                                                                                                              |                                                                                                                                                                                                                                                                                             | months.<br><br>Outcome assessment was through self-report, data from transportation offices, or data from auto insurers.                                                                                                                                |
| Tregear et al, 2010 (151)<br><br>Continuous Positive Airway Pressure Reduces Risk of Motor Vehicle Crash among Drivers with Obstructive Sleep Apnea: Systematic Review and Meta-analysis | Systematic Review and Meta-analysis | 2a, 3a<br><br>Cohort and case-control studies | Commercial and non-commercial motor vehicle (CMV) drivers<br><br>The primary objective was to determine whether <u>CPAP use could reduce the risk of motor vehicle crash</u> among drivers with OSA (9 studies, 1.976 pts). A secondary | A significant risk reduction following treatment (risk ratio = 0.278, 95% CI: 0.22 to 0.35; P < 0.001).<br><br>Daytime sleepiness improves significantly following a single night of treatment,<br><br>Simulated driving | Observational studies indicate that CPAP reduces motor vehicle crash risk among drivers with OSA.<br><br>Studies:<br><br>Barbe et al, 2006.<br><br>George et al 2001. Findley et al 2000.<br>Hortsmann et al | MEDLINE, PubMed (PreMEDLINE), EMBASE, PsycINFO, CINAHL, TRIS, and the Cochrane library<br><br>through May 27, 2009<br><br>- full-length, pub<br>- English language<br>- unique (not multiply published) data set,<br>- individuals with OSA, or including a separate analysis of those with | No data reported about compliance even some studies had this data<br><br>BIASES<br><br>-different types of crash: any, or only with property damage...<br><br>-self reported data in 7 studies<br><br>-pretreatment data about the crash were collected |

|                                |               |        |                                                                                                                              |                                                                          |                                                                                                                       |                                                                                                                                                                                                                                                                                                                                                                                                                                                                                                                       |                                                                                                                                                                                                                           |
|--------------------------------|---------------|--------|------------------------------------------------------------------------------------------------------------------------------|--------------------------------------------------------------------------|-----------------------------------------------------------------------------------------------------------------------|-----------------------------------------------------------------------------------------------------------------------------------------------------------------------------------------------------------------------------------------------------------------------------------------------------------------------------------------------------------------------------------------------------------------------------------------------------------------------------------------------------------------------|---------------------------------------------------------------------------------------------------------------------------------------------------------------------------------------------------------------------------|
|                                |               |        | objective involved <u>determining the time on treatment required for CPAP to improve driver safety</u> (6 studies, 205 pts). | performance improves significantly within 2 to 7 days of CPAP treatment. | 2000.<br>Yamamoto et al 2000.<br><br>Scharf et al 1999. Cassel et al 1996.<br>Engelman et al 1996. Kriger et al 1997. | OSA.<br><br>- ≥ 10 subjects aged ≥ 18 years.<br><br>- actual crash data to measure the risk for crash among individuals receiving CPAP, and the data must have been presented in a manner that allowed calculation of effect-size estimates and confidence intervals.<br><br>- the study must have attempted to determine the duration following initiation of CPAP treatment for individuals with OSA to reach a degree of improvement that would permit safe driving (within 2 weeks following initiation of CPAP). | retrospectively, post treatment prospectively (they acted different when they were watched Hawthorne effect)<br><br>-exposure (miles driven per unit time) only for 4 studies<br><br>-type of driving (highway, night...) |
| Antonopoulos et al, 2011 (146) | Meta-analysis | 2a, 3a | Ten studies on real accidents (1.221 patients),                                                                              | A statistically significant reduction in                                 | This meta-analyses demonstrated a                                                                                     | Medline, Embase, Scopus, Google Scholar, Ovid and                                                                                                                                                                                                                                                                                                                                                                                                                                                                     | Real and near miss accidents: from 18 studies 7 with                                                                                                                                                                      |

|                                                                                                                                                                                  |                                                                                                                                                |  |                                                                                                                                                 |                                                                                                                                                                                                                                                                                                                                                                         |                                                                                                                                                                                                                                                                                                                                               |                                                                                                                                                                                                                                                                                                                                                                                                           |                                                                                                                                                                                                                                                                                                   |
|----------------------------------------------------------------------------------------------------------------------------------------------------------------------------------|------------------------------------------------------------------------------------------------------------------------------------------------|--|-------------------------------------------------------------------------------------------------------------------------------------------------|-------------------------------------------------------------------------------------------------------------------------------------------------------------------------------------------------------------------------------------------------------------------------------------------------------------------------------------------------------------------------|-----------------------------------------------------------------------------------------------------------------------------------------------------------------------------------------------------------------------------------------------------------------------------------------------------------------------------------------------|-----------------------------------------------------------------------------------------------------------------------------------------------------------------------------------------------------------------------------------------------------------------------------------------------------------------------------------------------------------------------------------------------------------|---------------------------------------------------------------------------------------------------------------------------------------------------------------------------------------------------------------------------------------------------------------------------------------------------|
| <p>Nasal continuous positive airway pressure (nCPAP) treatment for obstructive sleep apnea, road traffic accidents and driving simulator performance:</p> <p>A meta-analysis</p> | <p>15 articles included</p> <p>Primary outcomes: real accidents, near miss accidents, and accident-related events in the driving simulator</p> |  | <p>five studies on near miss accidents (769 patients) and six studies on the performance in driving simulator (110 patients) were included.</p> | <p>real accidents and near miss accidents was observed.</p> <p>Likewise, a significant reduction in accident-related events was observed in the driving simulator</p> <p>It is estimated that for every five patients being treated with nCPAP, one patient avoids a real road traffic accident,</p> <p>whereas for every two patients being treated with nCPAP one</p> | <p>sizeable protective effect of nCPAP on road traffic accidents, both in real life and virtual environment.</p> <p>Studies: Barbe 2007. Cassel 1996. Engleman 1996. Findley 2000. George 2001. Hortsman 2000. Kryeger 1997. Minemura 1993. Suratt 1992. Yamamoto 2000</p> <p>On driving simulator</p> <p>Findley 1989</p> <p>George 1992</p> | <p>the Cochrane Library</p> <p>randomised and nonrandomised studies, editorials, systematic reviews, meta-analyses, short papers, case reports, case series, letters to the editor, personal views, special communications and unpublished data.</p> <p>April 1981 and July 2010</p> <p>1) Study descriptives; namely sample size, time period of road traffic accidents</p> <p>monitoring before and</p> | <p>compliance (GOOD COMPLIANCE)</p> <p>Driving simulator: from 6 studies, all included duration of CPAP treatment (7-276 days)</p> <p>BIASES:</p> <p>-noncompliance 9-36% (violation of anonymity)</p> <p>-km driven per patient</p> <p>-modifying effects of time upon the efficacy of nCPAP</p> |
|----------------------------------------------------------------------------------------------------------------------------------------------------------------------------------|------------------------------------------------------------------------------------------------------------------------------------------------|--|-------------------------------------------------------------------------------------------------------------------------------------------------|-------------------------------------------------------------------------------------------------------------------------------------------------------------------------------------------------------------------------------------------------------------------------------------------------------------------------------------------------------------------------|-----------------------------------------------------------------------------------------------------------------------------------------------------------------------------------------------------------------------------------------------------------------------------------------------------------------------------------------------|-----------------------------------------------------------------------------------------------------------------------------------------------------------------------------------------------------------------------------------------------------------------------------------------------------------------------------------------------------------------------------------------------------------|---------------------------------------------------------------------------------------------------------------------------------------------------------------------------------------------------------------------------------------------------------------------------------------------------|

|  |  |  |  |                                                          |                                                                    |                                                                                                                                                                                                                                                                                                                                                                                                                                                                                                                                                                                                                |  |
|--|--|--|--|----------------------------------------------------------|--------------------------------------------------------------------|----------------------------------------------------------------------------------------------------------------------------------------------------------------------------------------------------------------------------------------------------------------------------------------------------------------------------------------------------------------------------------------------------------------------------------------------------------------------------------------------------------------------------------------------------------------------------------------------------------------|--|
|  |  |  |  | <p>patient avoids a near miss road traffic accident.</p> | <p>Hack 2000<br/>Orth 2005<br/>Suratt 1992<br/>Turkington 2004</p> | <p>after nCPAP treatment,</p> <p>2) Demographic variables; namely age, sex, male to female ratio and anthropometrics such as weight or body mass index (BMI),</p> <p>3) Sleepapnoea related variables; namely AHI and respiratory disturbance index (RDI), nCPAP usage (number of hours used per night), sleep apnoea diagnostic tools used for patient recruitment and sleepiness scores,</p> <p>4) Driving-related variables; namely number of patients with real and near miss road traffic accidents,</p> <p>5) Driving simulator-related variables: number of accident-related events, tracking error</p> |  |
|--|--|--|--|----------------------------------------------------------|--------------------------------------------------------------------|----------------------------------------------------------------------------------------------------------------------------------------------------------------------------------------------------------------------------------------------------------------------------------------------------------------------------------------------------------------------------------------------------------------------------------------------------------------------------------------------------------------------------------------------------------------------------------------------------------------|--|

|                                                                                                                                              |                                            |                                                                                                  |                                                                                                                                                                                         |                                                                                                                                                                                   |                                                                                                                                                         |                                                                                                                                                                                                                                                                                                     |                                                                  |
|----------------------------------------------------------------------------------------------------------------------------------------------|--------------------------------------------|--------------------------------------------------------------------------------------------------|-----------------------------------------------------------------------------------------------------------------------------------------------------------------------------------------|-----------------------------------------------------------------------------------------------------------------------------------------------------------------------------------|---------------------------------------------------------------------------------------------------------------------------------------------------------|-----------------------------------------------------------------------------------------------------------------------------------------------------------------------------------------------------------------------------------------------------------------------------------------------------|------------------------------------------------------------------|
|                                                                                                                                              |                                            |                                                                                                  |                                                                                                                                                                                         |                                                                                                                                                                                   |                                                                                                                                                         | <p>(standard deviation from the center of the road) andvigilance reaction time, defined as average time needed to respondto visual stimulus for both before and after nCPAP treatment</p> <p>6)method used for data collection (self-report, state records orperformance on driving simulator).</p> |                                                                  |
| <p>Sassani et al, 2004 (152)</p> <p>Reducing Motor-Vehicle Collisions, Costs, and Fatalities by Treating ObstructiveSleep Apnea Syndrome</p> | <p>Systematic review and meta-analysis</p> | <p>2a, 3a</p> <p>Six articles included in the meta-analysis, ranged from 9 months to 5 years</p> | <p>Annual OSAS-related collisions, costs, and fatalities in the United States.</p> <p>Cost-benefit analysis of treating drivers suffering from OSAS with continuous positive airway</p> | <p>Drivers with OSAS perform worse on driving simulators, have higher collision ratesthan controls, and have fewer collisions after treatment withCPAP.</p> <p>CPAP treatment</p> | <p>Annually, a small but significant portion of motor-vehicle collisions, costs, and deaths are related to OSAS. With CPAP treatment, most of these</p> | <p>MEDLINE-PubMed database</p> <p>1980 to 2003</p> <p>The criteria for inclusion were original research regarding OSAS and collisions, prevalence of OSAS, and</p>                                                                                                                                  | <p>BIASES</p> <p>- Clinic population, not general population</p> |

|  |  |             |                                                                                                        |                                                                                                                              |                                                                                                                                                                                                                                       |                                          |  |
|--|--|-------------|--------------------------------------------------------------------------------------------------------|------------------------------------------------------------------------------------------------------------------------------|---------------------------------------------------------------------------------------------------------------------------------------------------------------------------------------------------------------------------------------|------------------------------------------|--|
|  |  | in duration | pressure (CPAP).<br>6 studies (9 months-5 years)<br>“The pooled OR included more than 1.290 subjects”. | can annually reduce collision costs by \$11.1 billion,<br>prevent more than 500,000 collisions, and save nearly 1,000 lives. | collisions, costs, and deaths can be prevented.<br><br>Treatment of OSAS benefits both the patient and the public.<br><br>Studies included:<br>Findley 1998, Barbe 1998, Teran-Santos 1999, Hortsman 2000, Lioberes 2000, George 2001 | management costs and patient compliance. |  |
|--|--|-------------|--------------------------------------------------------------------------------------------------------|------------------------------------------------------------------------------------------------------------------------------|---------------------------------------------------------------------------------------------------------------------------------------------------------------------------------------------------------------------------------------|------------------------------------------|--|

Abbreviations: AHI: Apnoea hypopnoea index; BMI: Body mass index; CMV: commercial motor vehicle; CPAP: continuous positive airway pressure; ESS: Epworth Sleepiness Scale; MVC: Motor vehicle collisions; OSA: Obstructive sleep apnoea; OSAS: Obstructive sleep apnoea syndrome; RDI: Respiratory Disturbance Index.

**Table e10. Studies on impact of continuous positive airway pressure (CPAP) treatment in obstructive sleep apnoea (OSA) among commercial and non-commercial motor vehicle drivers**

| Author, year | Study type (design) | Participants (No and characteristics: sex, age, treatments, comorbidity, | Length of follow-up | Quality of the | Results (including analysis of cofounders if any) | Notes |
|--------------|---------------------|--------------------------------------------------------------------------|---------------------|----------------|---------------------------------------------------|-------|
|--------------|---------------------|--------------------------------------------------------------------------|---------------------|----------------|---------------------------------------------------|-------|



|                      |                                                  |                                                                                                                                                                                                                                                    |         |       |                                                                                                                                                                                                                                                                                                                                                                                                                                                                                                                            |                                                                                                                                            |
|----------------------|--------------------------------------------------|----------------------------------------------------------------------------------------------------------------------------------------------------------------------------------------------------------------------------------------------------|---------|-------|----------------------------------------------------------------------------------------------------------------------------------------------------------------------------------------------------------------------------------------------------------------------------------------------------------------------------------------------------------------------------------------------------------------------------------------------------------------------------------------------------------------------------|--------------------------------------------------------------------------------------------------------------------------------------------|
|                      |                                                  | etc.)                                                                                                                                                                                                                                              |         | study |                                                                                                                                                                                                                                                                                                                                                                                                                                                                                                                            |                                                                                                                                            |
| Engleman, 1994 (153) | Randomised, placebo-controlled, cross-over study | 32 patients (26 men) with OSA: CPAP vs oral placebo.<br><br>Median AHI 28/h (7→129/h), age 49±1.5yrs, BMI 33±1.6kg/m <sup>2</sup> .                                                                                                                | 4 weeks | 1b    | Less daytime sleepiness on CPAP than during placebo (sleep latency 7.2±0.7 vs 6.1±0.7 min, p=0.03).<br><br>Improvements with CPAP in symptoms ratings (2.1±0.2 vs 4.3±0.3, p<0.001), mood (P<0.05 for several measures), cognitive performance with improved vigilance (obstacle hit in steer clear driving test 76±5 vs 81±6, p<0.01), mental flexibility (trail-making B time 66±5 vs 75±5s, p<0.05), and attention (p<0.05).                                                                                            | PSG<br><br>Monitored CPAP use<br><br>Low level of CPAP compliance [3.4 (0.4) hours per night]<br><br>MSLT for objective daytime sleepiness |
| Hack, 2000 (139)     | Randomised controlled trial                      | Improvement in steering performance using subtherapeutic NCPAP as a control.<br><br>59 men with OSA (ESS of >10<br><br>received therapeutic or subtherapeutic NCPAP (~1 cm H <sub>2</sub> O) for 1 month. Simulated steering performance. Men aged | 1 month | 1b    | Subtherapeutic NCPAP did not improve overnight >4% SaO <sub>2</sub> dips/h compared with baseline values, had no significant effect on the measures of steering (except for off-road events, p = 0.05), reaction time, or MWT, although it had a significant effect on the subjective ESS (p = 0.001).<br><br>Even for the off-road events, which are due to gross steering errors where the car is already half over the kerb, there is a trend in favor of therapeutic NCPAP.<br><br>Therapeutic NCPAP improves steering | PSG, MWT<br><br>No data on CPAP compliance<br><br>Male                                                                                     |

|                      |                             |                                                                                                                                                                                                                                                                                                                                                                                                                            |           |    |                                                                                                                                                                                                                              |                                                                                                                                                    |
|----------------------|-----------------------------|----------------------------------------------------------------------------------------------------------------------------------------------------------------------------------------------------------------------------------------------------------------------------------------------------------------------------------------------------------------------------------------------------------------------------|-----------|----|------------------------------------------------------------------------------------------------------------------------------------------------------------------------------------------------------------------------------|----------------------------------------------------------------------------------------------------------------------------------------------------|
|                      |                             | between 30 and 75 yrs.                                                                                                                                                                                                                                                                                                                                                                                                     |           |    | performance and reaction time to target stimuli.                                                                                                                                                                             |                                                                                                                                                    |
| Phillips, 2013 (154) | Randomised crossover trial  | <p>Health effects after 1 month of optimal CPAP and MAD therapy in OSA.</p> <p>126 patients, 81% male, 50% sleepy based on an ESS greater than 10, 82% with moderate-severe OSA (PSG - AHI 25.6 [SD 12.3]) and 108 completed the trial with both devices.</p> <p>Cardiovascular (24-h blood pressure, arterial stiffness), neurobehavioral (subjective sleepiness, driving simulator performance), and quality of life</p> | 1 month   | 1b | <p>Sleepiness, driving simulator performance, and disease-specific quality of life improved on both treatments by similar amounts, although MAD was superior to CPAP for improving four general quality-of-life domains.</p> | <p>PSG</p> <p>CPAP vs MAD</p> <p>Data on compliance (MAD, <math>6.50 \pm 1.3</math> h per night vs. CPAP, <math>5.20 \pm 2</math> h per night)</p> |
| Kay, 2013 (155)      | Randomised controlled trial | <p>69 newly diagnosed OSA patients (21-64 yrs of age, AHI &gt; 16, PSG), majority males (85.5%), mean AHI at baseline <math>43.12 \pm 26.1</math></p> <p>ESS at baseline <math>16.8 \pm 3</math> were randomised (1:1) to</p>                                                                                                                                                                                              | 2+6 weeks | 1b | <p>150 mg armodafinil on simulated driving performance during a 2-week "waiting period" prior to initiation of CPAP, following 6 weeks of CPAP therapy.</p> <p>CPAP compliance</p>                                           | <p>PSG</p> <p>Results regarding treatment with armodafinil before CPAP.</p> <p>Strong correlations</p>                                             |

|                   |                             |                                                                                                                                                                                                                                                                                                                                                                                                                                                                                                                                                     |                   |    |                                                                                                                                                                                                                                  |                                                                      |
|-------------------|-----------------------------|-----------------------------------------------------------------------------------------------------------------------------------------------------------------------------------------------------------------------------------------------------------------------------------------------------------------------------------------------------------------------------------------------------------------------------------------------------------------------------------------------------------------------------------------------------|-------------------|----|----------------------------------------------------------------------------------------------------------------------------------------------------------------------------------------------------------------------------------|----------------------------------------------------------------------|
|                   |                             | <p>placebo or armodafinil (150 mg/day) treatment. No significant differences between treatment groups.</p> <p>Exclusion: any unstable medical condition, circadian rhythm disorder, RLS, narcolepsy, other significant sleep disorders, irregular sleep schedules, use of sedating antihistamines, selective serotonin reuptake inhibitors, muscle relaxants or hypnotics, consumption &gt; 600 mg of caffeine per day, alcohol abuse, simulator sickness, and medical conditions or use of medications contraindicated for use of armodafinil.</p> |                   |    | <p>ESS, FOSQ, MOS-CF6</p> <p>Armodafinil was found to improve simulated driving performance in OSA patients with EDS prior to initiation of CPAP. Treatment with armodafinil showed no effect on subsequent CPAP compliance.</p> | <p>between primary and secondary endpoints and hours of CPAP use</p> |
| Walia, 2019 (156) | Cross-sectional prospective | 2,059 patients with OSA (age $56.0 \pm 13.1$ yrs, 45.4%                                                                                                                                                                                                                                                                                                                                                                                                                                                                                             | Average follow-up | 2b | In the entire cohort drowsy driving incidents reduced from 14.2 to 6.9% after PAP therapy (P                                                                                                                                     | <p>USA</p> <p><u>Self-reported and</u></p>                           |

|                       |        |                                                                                                                                                                                                                                                                                                                                                     |                      |    |                                                                                                                                                                                                                                                                                                                                                                                                                              |                                                                                                                                                                                                 |
|-----------------------|--------|-----------------------------------------------------------------------------------------------------------------------------------------------------------------------------------------------------------------------------------------------------------------------------------------------------------------------------------------------------|----------------------|----|------------------------------------------------------------------------------------------------------------------------------------------------------------------------------------------------------------------------------------------------------------------------------------------------------------------------------------------------------------------------------------------------------------------------------|-------------------------------------------------------------------------------------------------------------------------------------------------------------------------------------------------|
|                       | study  | female, 76.0% white),<br>questionnaires<br>(Epworth Sleepiness Scale<br>and Patient Health<br>Questionnaire-9)                                                                                                                                                                                                                                      | 124.4 ± 67.3<br>days |    | <p>&lt; .001). In subgroups, drowsy driving incidents reduced from 14% to 5.3% (P &lt; .001) in patients who self-reported adherence to PAP therapy and 14.1% to 5.3% (P &lt; .001) in patients objectively adherent to PAP therapy.</p> <p>For each one-point improvement in Epworth Sleepiness Scale score, the odds of drowsy driving decreased by about 14% (odds ratio 0.86, 95% confidence interval 0.82 to 0.90).</p> | <p><u>objective CPAP use</u></p> <p>No control group.</p>                                                                                                                                       |
| Cassel, 1996<br>(157) | Cohort | <p>78 male patients (25-65yrs), drivers, questionnaire (alertness-related problems while driving), 80 min vigilance test, MSLT</p> <p>59 patients completed the study</p> <p>Exclusion criteria: chronic intake of sedatives, narcolepsy, periodic limb movement, lung diseases, other chronic medical illnesses, known alcohol and drug abuse.</p> | 1 year               | 2b | <p>AHI pretreatment 34.2±3.1 events/h. AHI at 1 year: 3.1±1.3 events/h</p> <p>CPAP 8.9±0.26 cmH2O</p> <p>The mean annual distance driven by the group was 29,606±2,367 km/year.</p> <p>Sleeping spells, fatigue, vigilance test reaction time, daytime sleep latency improved with treatment.</p> <p>The accident rate was significantly decreased from 0.8 to 0.15 per 100.000km.</p>                                       | <p>Germany</p> <p>Males</p> <p>Excluded other causes of sleepiness</p> <p>PSG</p> <p>Objective CPAP use available for 44 out of the 71 patients (6.1±0.16 h)</p> <p>7 from 78 patients (9%)</p> |

|                     |                                |                                                                                                                                                                                                                                                                                                                                        |           |    |                                                                                                                                                                                                                                                                                                                                                                                                                                                                                                                                                                                                                         |                                                                                                                                                                                                           |
|---------------------|--------------------------------|----------------------------------------------------------------------------------------------------------------------------------------------------------------------------------------------------------------------------------------------------------------------------------------------------------------------------------------|-----------|----|-------------------------------------------------------------------------------------------------------------------------------------------------------------------------------------------------------------------------------------------------------------------------------------------------------------------------------------------------------------------------------------------------------------------------------------------------------------------------------------------------------------------------------------------------------------------------------------------------------------------------|-----------------------------------------------------------------------------------------------------------------------------------------------------------------------------------------------------------|
|                     |                                |                                                                                                                                                                                                                                                                                                                                        |           |    |                                                                                                                                                                                                                                                                                                                                                                                                                                                                                                                                                                                                                         | discontinued CPAP                                                                                                                                                                                         |
| Krieger, 1997 (158) | Prospective, multicentre study | <p>The effects of CPAP before treatment and after 3,6, 12 months after CPAP. No control group. Questionnaires (also regarding accidents).</p> <p>973 patients proposed to CPAP, 893 underwent CPAP, 547 patients completed the study.</p> <p>Age 56.6±20.7yrs, 86.5% males, %), PSG 725, AHI 59.8±25.8/h. PG 168, AHI 34.9±21.1/h.</p> | 12 months | 2b | <p>The number of patients having an accident decreased with treatment for real accidents (from 60 to 36; <math>p&lt;0.01</math>), as well as for near-miss accidents (from 151 to 32; <math>p&lt;0.01</math>). The average number of accidents per patient also decreased, for real accidents (from 1.6± 1.3 to 1.1±0.3; <math>p&lt;0.01</math>) and for near-miss accidents (from 4.5±6.5 to 1.8±1.4; <math>p&lt;0.01</math>). The cost, in terms of days in hospital related to accidents, decreased from 885 to 84 days.</p> <p>Treatment with CPAP decreases the number of accidents occurring in OSA patients.</p> | <p>PG, PSG</p> <p>No control group.</p> <p>No difference on CPAP adherence between patients reporting accidents and patients reporting no accidents (5 h 57 min±1 h 53 min vs 6 h 7 min:±1 h 58 min).</p> |
| Scharf, 1999 (159)  | Prospective outcome study      | Number of automobile accidents and near-miss automobile accidents surveyed by questionnaire.                                                                                                                                                                                                                                           | 6 months  | 2b | <p>Significant decreases were found in the number of incidents of excessive daytime sleepiness, headaches on awakening, physician visits, days absent from work, and automobile accidents or near misses with NCPAP therapy. Patients also</p>                                                                                                                                                                                                                                                                                                                                                                          | <p>PSG</p> <p>Surveyed by questionnaire</p>                                                                                                                                                               |

|                      |                                 |                                                                                                                                                                                                                                                                                                                                      |                           |    |                                                                                                                                                                                                                                                                                                                                                                                                                                                                                                                                                                                                                                                                                                                                                                                               |                                                                                                                     |
|----------------------|---------------------------------|--------------------------------------------------------------------------------------------------------------------------------------------------------------------------------------------------------------------------------------------------------------------------------------------------------------------------------------|---------------------------|----|-----------------------------------------------------------------------------------------------------------------------------------------------------------------------------------------------------------------------------------------------------------------------------------------------------------------------------------------------------------------------------------------------------------------------------------------------------------------------------------------------------------------------------------------------------------------------------------------------------------------------------------------------------------------------------------------------------------------------------------------------------------------------------------------------|---------------------------------------------------------------------------------------------------------------------|
|                      |                                 | <p>316 patients with diagnosed and treated OSA, 234 men, 82 women</p> <p>Mean age, 48.79 +/- 0.67 yrs; mean pretreatment RDI 42.9 +/- 1.7 episodes per hour and 2.8 +/- 0.2 episodes per hour with NCPAP treatment).</p>                                                                                                             |                           |    | <p>reported subjective increases in productivity, quality of life, physical and mental condition, and short-term memory and reduction in both diastolic and systolic blood pressure. Effective treatment of OSA results in improvement both in preexisting symptoms and in quality of life. Improvement in many of the major problems experienced by patients seeking treatment has important implications for preventive medicine as well as health care cost containment.</p>                                                                                                                                                                                                                                                                                                               | Data on CPAP adherence (6.58 ± 0.06)                                                                                |
| Yamamoto, 2000 (160) | Prospective observational study | <p>Long-term effects of CPAP via questionnaire before and after nasal CPAP treatment.</p> <p>74 male patients (age 49.5 ± 10.8, BMI 29.7 ± 5.4), severe OSAS, PSG, driving history for 2 yr.</p> <p>Epworth Sleepiness Scale (ESS), mood by the Self-related Depression Scale (SDS).</p> <p>47 patients (63%) responded to these</p> | 2 yrs (38.8 ± 8.2 months) | 2b | <p>No traffic car accidents were observed among the 39 routine car users during treatment, while 13 of 39 patients (33%) had a car accident before treatment. Although near-miss accidents had been reported by 32 of 39 patients (82%) before treatment, only 4 patients reported near-miss accidents during nasal CPAP treatment. The mean score of ESS was significantly reduced in 46 patients after nasal CPAP. The mean score of SDS was also decreased (P&lt;0.01) after nasal CPAP in 46 patients. Although 26 of 41 patients had been depressive on SDS before treatment, the mood was improved in 13 patients after nasal CPAP.</p> <p>These results suggest that long-term nasal CPAP treatment reduces the rate of traffic car accidents and improves the EDS and the mood in</p> | <p>PSG</p> <p>Japanese</p> <p>Male</p> <p>Mean duration of CPAP was 38.8 ± 8.2 months, CPAP compliance of 97.8%</p> |

|                  |                                 |                                                                                                                                                                                                                                                                                                                                                 |         |    |                                                                                                                                                                                                                                                                                                                                                                                                                                                                                                                                                                                                                                                                                               |                                                           |
|------------------|---------------------------------|-------------------------------------------------------------------------------------------------------------------------------------------------------------------------------------------------------------------------------------------------------------------------------------------------------------------------------------------------|---------|----|-----------------------------------------------------------------------------------------------------------------------------------------------------------------------------------------------------------------------------------------------------------------------------------------------------------------------------------------------------------------------------------------------------------------------------------------------------------------------------------------------------------------------------------------------------------------------------------------------------------------------------------------------------------------------------------------------|-----------------------------------------------------------|
|                  |                                 | questionnaires. 46 of 47 had continued to use the nasal CPAP and completed the questionnaire (mean duration and CPAP level were $38.8 \pm 8.2$ months, CPAP compliance of 97.8%)                                                                                                                                                                |         |    | patients with OSAS.                                                                                                                                                                                                                                                                                                                                                                                                                                                                                                                                                                                                                                                                           |                                                           |
| Orth, 2005 (143) | Observational prospective study | <p>Neuropsychological testing of different attention aspects, driving simulation, therapeutic effects of CPAP.</p> <p>Driving simulator investigation and neuropsychological testing of alertness, vigilance and divided attention in 31 patients with PSG confirmed OSAS (apnoea-hypopnoea index <math>24.8 \pm 21.5</math>) before, and 2</p> | 42 days | 2b | <p>Significant improvements were seen in terms of alertness and divided attention, whereas vigilance remained unchanged throughout the course of CPAP therapy. However, accident frequency (OSAS before therapy: <math>2.7 \pm 2.0</math>; 2 days after CPAP: <math>1.5 \pm 1.4</math>; 42 days after CPAP: <math>0.9 \pm 1.3</math>) and frequency of concentration faults (OSAS before therapy: <math>12.4 \pm 5.1</math>; 2 days after CPAP: <math>6.5 \pm 3.9</math>; 42 days after CPAP: <math>4.9 \pm 3.3</math>) decreased in the simulated driving situation after 2 and 42 days of therapy. No relation between accident frequency, concentration faults and daytime sleepiness.</p> | <p>PSG</p> <p>Males</p> <p>No data on CPAP compliance</p> |

|                 |                                             |                                                                                                                                                                                                                                                                                                                                                                                                                                                                                   |          |    |                                                                                                              |                                                                          |
|-----------------|---------------------------------------------|-----------------------------------------------------------------------------------------------------------------------------------------------------------------------------------------------------------------------------------------------------------------------------------------------------------------------------------------------------------------------------------------------------------------------------------------------------------------------------------|----------|----|--------------------------------------------------------------------------------------------------------------|--------------------------------------------------------------------------|
|                 |                                             | <p>and 42 days after initiation of CPAP.</p> <p>31 male patients, 55.3±10.2 yrs; BMI: 29.9±2.2 kg/m<sup>2</sup>; 24 (77%) agreed to CPAP therapy and 21 (68%) completed the study 42 days after initiating CPAP</p> <p>Exclusion criteria: cerebral diseases (head injuries, cerebral ischemia and encephalitis); central nervous stimulating or relaxing medication; alcohol or drug abuse; disability to drive a car; chronic obstructive pulmonary disease; and pregnancy.</p> |          |    |                                                                                                              |                                                                          |
| Hui, 2006 (161) | Large cross-sectional epidemiological study | 1,016 bus drivers (971 men): 45.3 (7.5) years, BMI 24.9 (3.6) kg/m <sup>2</sup> , neck circumference 38.9 (3.1) cm and Epworth                                                                                                                                                                                                                                                                                                                                                    | 3 months | 2b | BMI, snoring intensity and neck circumference were the positive independent factors associated with the RDI. | <p>Only 9 patients with CPAP</p> <p>CPAP usage of 4.5 (1.3) h/night.</p> |



|                   |                                             |                                                                                                                                                                                                                                                                                                                                                                                              |                                                                              |    |                                                                                                                                                                                                                                                                                                                             |                                                                                                                                               |
|-------------------|---------------------------------------------|----------------------------------------------------------------------------------------------------------------------------------------------------------------------------------------------------------------------------------------------------------------------------------------------------------------------------------------------------------------------------------------------|------------------------------------------------------------------------------|----|-----------------------------------------------------------------------------------------------------------------------------------------------------------------------------------------------------------------------------------------------------------------------------------------------------------------------------|-----------------------------------------------------------------------------------------------------------------------------------------------|
|                   |                                             | <p>sleepiness score 4.8 (4.0).</p> <p>Among 211 who underwent home sleep study, 85 (40.3%), 55 (26.1%) and 37 (17.5%) had RDI <math>\geq 5</math>, <math>\geq 10</math> and <math>\geq 15</math>/h respectively at PSG for confirmation</p> <p>Drivers with accidents n=6</p> <p>Without accidents n=1.010</p> <p>None of the 6 drivers with history of RTA took sedating antihistamines</p> |                                                                              |    | <p>9 accepted CPAP prescription</p> <p>after 3 months with CPAP usage of 4.5 (1.3) h/night.</p> <p>No significant change in SAQLI, digit symbol, trail A and stroop colour assessment</p>                                                                                                                                   |                                                                                                                                               |
| Barbe, 2007 (162) | Case-control, prospective, controlled study | <p>80 patients with OSAS (78 males) vs 80 healthy subjects.</p> <p>Excluded: shift workers, drug abusers psychiatric disorders, epilepsy, narcolepsy, RLS.</p> <p>Patients group: ESS=12<math>\pm</math>1,</p>                                                                                                                                                                               | 2 years before and the 2 years after study entry at which CPAP was initiated | 2b | <p>Automobile collision risk for OSAS RR = 2.57; 95% CI = 1.30–5.05.</p> <p>After CPAP RR = 0.41; 95% CI = 0.21–0.79</p> <p>In controls RR = 0.49; 95% CI = 0.17–1.40. The magnitude of this fall between groups was not different (p for interaction = 0.68), even after adjusting for body mass index, alcohol intake</p> | <p>PSG</p> <p>CPAP compliance was evaluated (5.9 <math>\pm</math> 0.3 h/night).</p> <p>They had exclusion criteria.</p> <p>Reduction also</p> |

|                       |                                                                                 |                                                                                                                                                                                                                                                          |              |    |                                                                                                                                                                                                                                                                                                                                                                                                                                               |                                                                                                              |
|-----------------------|---------------------------------------------------------------------------------|----------------------------------------------------------------------------------------------------------------------------------------------------------------------------------------------------------------------------------------------------------|--------------|----|-----------------------------------------------------------------------------------------------------------------------------------------------------------------------------------------------------------------------------------------------------------------------------------------------------------------------------------------------------------------------------------------------------------------------------------------------|--------------------------------------------------------------------------------------------------------------|
|                       |                                                                                 | age=49±1ys, AHI=60±2/h<br><br>Control group: ESS=3±0.2, age=46±1                                                                                                                                                                                         |              |    | and Epworth scale.<br><br>The risk of suffering a traffic collision was significantly reduced after inclusion in the study. Yet, as this reduction also occurred in the control group, this effect may not be due to CPAP therapy.                                                                                                                                                                                                            | occurred in the control group.                                                                               |
| Komada 2009 (39)      | Cross-sectional retrospective study and a prospective long-term follow-up study | 616 OSAS drivers (age 46.3±10/1yrs, BMI=27.4±4.7kg/m <sup>2</sup> ) vs 600 male controls (age 45.5±9.8/h, BMI 23.4±2.9kg/m <sup>2</sup> ).<br><br>CPAP prescribed for 365 patients with AHI>20/h and 291 patients (76.7%) continued to use CPAP for >5ys | 72±7.6months | 2b | Mean AHI of 291 patients before CPAP: 61.6±22.8/h.<br><br>Mean duration of CPAP use: 72±7.6 months.<br><br>OR for MVA vs general population=2.36.<br><br>MVA significantly higher in patients with ESS≥11 or AHI>40/h.<br><br>AHI significantly higher in the group with multiple MVA.<br><br>CPAP - effective for reduction of MVA.<br><br>No significant difference between the control group and the CPAP-treated OSAS group at follow-up. | Japanese population<br><br>Males<br><br>PSG: manually scored<br><br>Mean duration of CPAP use: 72±7.6 months |
| Avlonitou, 2012 (163) | Prospective study                                                               | 50 patients (41 males)                                                                                                                                                                                                                                   | 6 months     | 2b | CPAP significantly improves SQALI score and ESS (ESS 13.7±6.5/h, at 6 months 3.9±3.8/h, p<0.01), "sleepiness while watching a spectacle" (96%), "reading" (95%), "carrying on a conversation" (95%), "driving" (92.9%), "restless sleep"                                                                                                                                                                                                      | PSG<br><br>Driving was only an improved symptom                                                              |

|                        |              |                                                                                                                                                                                                                                                                                                                                                                                                                                                                                                       |          |    |                                                                                                                                                                                                                                                                                                                                                                                                                                                                                                                                                                                                                                                                                                                                                                                                                                                    |                                                                                                                  |
|------------------------|--------------|-------------------------------------------------------------------------------------------------------------------------------------------------------------------------------------------------------------------------------------------------------------------------------------------------------------------------------------------------------------------------------------------------------------------------------------------------------------------------------------------------------|----------|----|----------------------------------------------------------------------------------------------------------------------------------------------------------------------------------------------------------------------------------------------------------------------------------------------------------------------------------------------------------------------------------------------------------------------------------------------------------------------------------------------------------------------------------------------------------------------------------------------------------------------------------------------------------------------------------------------------------------------------------------------------------------------------------------------------------------------------------------------------|------------------------------------------------------------------------------------------------------------------|
|                        |              |                                                                                                                                                                                                                                                                                                                                                                                                                                                                                                       |          |    | (87.8%), and "urinating more than once per night" (84.8%)                                                                                                                                                                                                                                                                                                                                                                                                                                                                                                                                                                                                                                                                                                                                                                                          | Mean CPAP usage 4.5±0.5/h.                                                                                       |
| Alakuijala, 2014 (164) | Cohort-study | <p>34 healthy (23 females) controls</p> <p>in order to determine the normative data for Oxford Sleep Resistance Test (OSLER), and for multiple unprepared reaction time (MURT) test.</p> <p>Were evaluated modifications in OSLER and MURT values in 192 patients who were referred for suspicion of OSA (PG).</p> <p>Of 173 treated OSA patients, 29 professional drivers were retested within 6 months of treatment</p> <p>Excluded: subjects who considered themselves sleepy, did shift work,</p> | 6 months | 2b | <p>The OSLER error index (the number of all errors divided by the duration of the session in hours) correlated statistically significantly with sleep latency, MURT time, and ESS.</p> <p>Strikingly, OSLER SL, the error index, and median reaction time in the MURT test differed statistically significantly between women and men.</p> <p>OSLER and MURT were retested in 29 patients within 6 months after initiation of CPAP therapy. These patients worked as professional drivers and they had had daytime somnolence before the treatment. Treatment improved all the sleep study parameters and ESS scores, no significant change in BMI or medication, and OSLER sleep latency from 33 min 4 s to 36 min 48 s, OSLER error index from 66/h to 26/h, and MURT time from 278 ms to 224 ms; all differences statistically significant.</p> | <p>PG</p> <p>More females</p> <p>Some participants were professional drivers</p> <p>CPAP use ≥ 4 h per night</p> |

|                    |                                                        |                                                                                                                                                                               |             |    |                                                                                                                                                                                                                                                                                                                                                                                                                                                                                                                                                                                                                                                                                                                                                      |                                                                                                                                    |
|--------------------|--------------------------------------------------------|-------------------------------------------------------------------------------------------------------------------------------------------------------------------------------|-------------|----|------------------------------------------------------------------------------------------------------------------------------------------------------------------------------------------------------------------------------------------------------------------------------------------------------------------------------------------------------------------------------------------------------------------------------------------------------------------------------------------------------------------------------------------------------------------------------------------------------------------------------------------------------------------------------------------------------------------------------------------------------|------------------------------------------------------------------------------------------------------------------------------------|
|                    |                                                        | used any kind of medication or substances that affect the central nervous system, had signs of any sleep disorder, or who reported sleeping poorly the night before the test. |             |    |                                                                                                                                                                                                                                                                                                                                                                                                                                                                                                                                                                                                                                                                                                                                                      |                                                                                                                                    |
| Karimi, 2015 (165) | Clinical sleep laboratory and population-based control | <p>1.478 OSA patients vs 21.118 control</p> <p>n = 567 with CPAP available data</p> <p>70.4% males</p> <p>Mean age 53.6±12.8yrs, ESS 10.6±5.2, AHI 17.9±3.2/h</p>             | 3.5+/-1 yrs | 2b | <p>MVA risk ratio of 2.45 (p&lt;0.001)</p> <p>Driving distance (km/y), ESS≥16, short habitual sleep time (≤5h/night), use of hypnotics were associated with increased risk of MVA (OR 1.2, 2.1, 2.7, 2.1, all p&lt;0.03)</p> <p>CPAP use ≥4h/night was associated with a reduction of MVA incidence (7.6 to 2.5 accidents/1000 drivers/y)</p> <p>The MVA incidence was reduced by 70.0% among patients with high CPAP (≥ 4 h/night) compliance, whereas it increased by 54.0% among noncompliant patients (&lt; 4 h/night or off CPAP).</p> <p>Untreated OSA increases the risk of MVA and this is influenced by severe daytime sleepiness.</p> <p>Apnoea events do not predict MVA risk, but OSA treatment with CPAP leads to considerable risk</p> | <p>Sweden</p> <p>PG</p> <p>Also includes females</p> <p>CPAP use &lt;4h/night were classified insufficiently compliant (n=304)</p> |

|                   |                                                                                       |                                                                                                                                                                                                                                                   |                                |    |                                                                                                                                                                                                                                                                                                                                                                                                                                                                                                                                                                                                    |                                                                                                                                          |
|-------------------|---------------------------------------------------------------------------------------|---------------------------------------------------------------------------------------------------------------------------------------------------------------------------------------------------------------------------------------------------|--------------------------------|----|----------------------------------------------------------------------------------------------------------------------------------------------------------------------------------------------------------------------------------------------------------------------------------------------------------------------------------------------------------------------------------------------------------------------------------------------------------------------------------------------------------------------------------------------------------------------------------------------------|------------------------------------------------------------------------------------------------------------------------------------------|
|                   |                                                                                       |                                                                                                                                                                                                                                                   |                                |    | reduction.                                                                                                                                                                                                                                                                                                                                                                                                                                                                                                                                                                                         |                                                                                                                                          |
| Bajaj, 2015 (166) | Cross-sectional prospective study                                                     | 118 subjects (71 males)                                                                                                                                                                                                                           | 2-6 months (median 2.5 months) | 2b | <p>OSA and cirrhosis (age 53±5 years)</p> <p>Vs 7 OSA patients without cirrhosis (age 52±4 years) who were initiated on CPAP. Patients were re-tested after a median of 2.5 months (2-6 months) post-CPAP.</p> <p>Improvement in PSQI, post-simulator sleepiness change and executive function (reduction in ICT lures). There was a significant reduction in lane deviations over time after CPAP compared to pre-CPAP in both cirrhotic and non-cirrhotic patients.</p> <p>CPAP therapy improves executive function and stimulator performance in patients with OSA regardless of cirrhosis.</p> | <p>PSG</p> <p>No data on CPAP compliance</p>                                                                                             |
| Burks, 2016 (167) | Retrospective Cohort Approach With Case-Control Matching Determines Study Sub-groups. | <p>OSA positive n = 1.613</p> <p>OSA negative n = 403</p> <p>matched to control drivers unlikely to have OSA n = 2.016, 8.9% females</p> <p>Treatment adherence: "Full Adherence" (n = 682, 5.7% females), "Partial Adherence" (n = 571, 4.2%</p> |                                | 2b | <p>"No Adherence" cases crash rate was fivefold greater (incidence rate ratio = 4.97, 95% confidence interval: 2.09, 10.63) than that of matched controls (0.070 versus 0.014 per 100,000 miles). The crash rate of "Full Adherence" cases was statistically similar to controls (incidence rate ratio = 1.02, 95% confidence interval: 0.48, 2.04; 0.014 per 100,000 miles).</p>                                                                                                                                                                                                                  | <p>PSG, APAP, non-compliant were excluded.</p> <p>No data on the duration of CPAP treatment.</p> <p>Adherence according to consensus</p> |

|                             |                                 |                                                                                                                                                                                         |           |    |                                                                                                                                                                                                                                                                                                                                    |                                                                                                                                                              |
|-----------------------------|---------------------------------|-----------------------------------------------------------------------------------------------------------------------------------------------------------------------------------------|-----------|----|------------------------------------------------------------------------------------------------------------------------------------------------------------------------------------------------------------------------------------------------------------------------------------------------------------------------------------|--------------------------------------------------------------------------------------------------------------------------------------------------------------|
|                             |                                 | females), or “No Adherence” (n = 360, 4.4% females)                                                                                                                                     |           |    |                                                                                                                                                                                                                                                                                                                                    | minimum standard of 4 h/night mean APAP use for ≥ 70% of night                                                                                               |
| Sergio Garbarino, 2016 (29) | Observational prospective study | 283 male truck drivers of dangerous goods (TDDGs), OSA in 35.7%.<br><br>Mean age 42.3±8.3 years.                                                                                        | 2ys       | 2b | Subjects with severe OSA risk of NMAs: OR=4.745, 95% CI 1.292–17.424, p=0.019.<br><br>After 2 years of CPAP treatment, the rate of NMAs was comparable with drivers without OSA.                                                                                                                                                   | PSG<br><br>Male<br><br>Truck drivers of dangerous goods<br><br>Mean CPAP use 345.3±31.7 minutes/night, mean percentage of days of CPAP use >4 hours 80.9±9.8 |
| Grote et al. 2018 (168)     | Retrospective study             | Certification group (n=132): patients with OSA (AHI>15) undergoing the driving license certification process.<br><br>Control group/clinical CPAP group (n=790): patients with moderate- | 12 months | 2b | Over-representation of elderly OSA patients in the certificate group.<br><br>Self-assessed improvement in subjective daytime sleepiness (from baseline to follow-up):<br><br>- two times higher in the certification group than in the reference patient group (mean adjusted change in ESS -8.0 (-8.9 – -7.1) versus -4.0 (-4.4 – | First study to address the clinical practice of driving license attestation in patients with OSA and EDS after the new EU                                    |

|               |                     |                                                                                                                                                                                                                                                                                                                                                                                                                                                                                                                                                           |  |    |                                                                                                                                                                                                                                                                                 |                                                                                                                                                                                                                           |
|---------------|---------------------|-----------------------------------------------------------------------------------------------------------------------------------------------------------------------------------------------------------------------------------------------------------------------------------------------------------------------------------------------------------------------------------------------------------------------------------------------------------------------------------------------------------------------------------------------------------|--|----|---------------------------------------------------------------------------------------------------------------------------------------------------------------------------------------------------------------------------------------------------------------------------------|---------------------------------------------------------------------------------------------------------------------------------------------------------------------------------------------------------------------------|
|               |                     | <p>severe OSA.</p> <p>Certification/reference group:</p> <p>Age <math>59 \pm 12/57 \pm 11</math> yrs<br/> BMI <math>30 \pm 5/31 \pm 5</math> kg/m<sup>2</sup>, AHI <math>33 \pm 20/36 \pm 20</math> n/h, ESS <math>12 \pm 6/11 \pm 5</math></p> <p>Annual driving distance<br/> 41,615/18,543km/year</p> <p>Mean adjusted PAP compliance data (n=124 certificate group. N=651 in clinical CPAP group):</p> <p>- 6.0 (5.4–6.6) h/night certificate group</p> <p>- 3.5 (3.3–3.8) h/night reference cohort</p> <p>(n = 726, GLM analysis, p &lt; 0.001).</p> |  |    | <p>-3.5)<br/> (p &lt; 0.001, GLM analysis, n = 343).</p> <p>The change in ESS score from baseline was associated with CPAP compliance (hr/day) in the reference patient group (r=-0.25, p = 0.003), but not in the certification group (r = 0.1, p = not significant [NS]).</p> | <p>regulations in 2014.</p> <p>Patients attending the fitness to drive procedure showed an ideal treatment response: almost complete adherence and elimination of EDS symptoms.</p> <p>CPAP compliance data available</p> |
| Findley, 1989 | Case-control study, | 6 subjects (5 men) with                                                                                                                                                                                                                                                                                                                                                                                                                                                                                                                                   |  | 3b | The patients with apnoea hit a greater number of road obstacles during their 30-minute                                                                                                                                                                                          | No data about the type of sleep                                                                                                                                                                                           |

|                      |                                |                                                                                                                                                                                                                                                         |                                       |    |                                                                                                                                                                                                                                                                                                                 |                                                                                                                                         |
|----------------------|--------------------------------|---------------------------------------------------------------------------------------------------------------------------------------------------------------------------------------------------------------------------------------------------------|---------------------------------------|----|-----------------------------------------------------------------------------------------------------------------------------------------------------------------------------------------------------------------------------------------------------------------------------------------------------------------|-----------------------------------------------------------------------------------------------------------------------------------------|
| (109)                | computer simulator             | untreated, severe apnoea                                                                                                                                                                                                                                |                                       |    | simulated drive than did the control subjects ( $44 \pm 52$ in patients with apnoea versus $9 \pm 7$ in control subjects, $p < 0.05$ ). Six patients with apnoea hit fewer road obstacles after treatment with CPAP than before treatment ( $29 \pm 19$ before CPAP versus $13 \pm 8$ after CPAP, $p < 0.05$ ). | study, compliance, CPAP duration or compliance                                                                                          |
| Engleman, 1997 (169) | Cohort study                   | 99 patients (11 females) with OSA before and after CPAP, questionnaires<br><br>Age 50yrs, ESS pre-CPAP 14, postCPAP 6 ( $p < 0.001$ )                                                                                                                   | 2-70 weeks, median 22 weeks, 6h/night | 3b | Auto-reported driving impairment improved after CPAP                                                                                                                                                                                                                                                            | PSG                                                                                                                                     |
| George, 1997 (138)   | Prospective case-control study | 17 men with OSA ( $49.7 \pm 11.2$ ys), with initial AHI of 73/h ( $\pm 28.9$ ) were restudied after 9.2 months ( $\pm 4.2$ ) of nCPAP 18 control group<br>Exclusion criteria: use of sedatives, diagnosis other than OSA, hypothyroidism, AHI $< 15$ /h | 9.2 months $\pm 4.2$                  | 3b | Performance improved with treatment in patients with OSA.<br><br>MSLT improved significantly under CPAP ( $7.2 \pm 7$ vs $13.2 \pm 6.7$ min, $p < 0.001$ ); no difference between control and treated group.                                                                                                    | PSG<br><br>Sleep latency/MSLT<br><br>Link with drivers: divided attention driving test<br><br>Self reported CPAP use of $\geq 6$ /night |
| Hakkanen, 1999 (170) | Randomized case control study  | 10 drivers with OSAS and their matched controls<br><br>9 weeks of CPAP                                                                                                                                                                                  | 9 weeks                               | 3b | MWT and a monotonous on-road driving task, eyeblink duration and frequency and speed control - No significant difference between groups in average blink rate, driving                                                                                                                                          | PSG<br><br>Males<br><br>MWT                                                                                                             |



|                      |                            |                                                                                                                                                                                                                                                                                                                                              |                               |    |                                                                                                                                                                                                                                                                                                                                                                                                                                                                                                                                                    |                                                                                                                    |
|----------------------|----------------------------|----------------------------------------------------------------------------------------------------------------------------------------------------------------------------------------------------------------------------------------------------------------------------------------------------------------------------------------------|-------------------------------|----|----------------------------------------------------------------------------------------------------------------------------------------------------------------------------------------------------------------------------------------------------------------------------------------------------------------------------------------------------------------------------------------------------------------------------------------------------------------------------------------------------------------------------------------------------|--------------------------------------------------------------------------------------------------------------------|
|                      |                            |                                                                                                                                                                                                                                                                                                                                              |                               |    | performance in terms of maintenance of speed, no significant lane drifting                                                                                                                                                                                                                                                                                                                                                                                                                                                                         |                                                                                                                    |
| Findley, 2000 (171)  | Case-control study         | <p>50 patients (43 males)</p> <p>36 (72%, 30 males) reports using CPAP regularly during 2ys (7.2 <math>\pm</math> 0.3h/night)</p> <p>14 patients (13 males) not used CPAP during 2 ys</p> <p>Age 56 <math>\pm</math> 2ys, AHI 37 <math>\pm</math> 3.8/h</p>                                                                                  | 2ys                           | 3b | <p>OSA patients had a higher automobile crash rate than all drivers in the state of Colorado (0.07 versus 0.01 crash per driver per year, p= 0.02).</p> <p>Patients who were treated with nasal CPAP had a lower crash rate than before treatment (0.07 versus 0 crash per driver per year, p , 0.03)</p> <p>Drivers with sleep apnoea were reluctant to report their automobile crashes, for the drivers in this study reported only one-third of the crashes in which they were involved.</p>                                                    | <p>PSG</p> <p>state of Colorado</p> <p>No data on CPAP compliance</p>                                              |
| Hortsmann, 2000 (42) | Retrospective case-control | <p>156 OSA patients (56.2<math>\pm</math>12.5ys, 92% males, BMI 26.3<math>\pm</math>4.7 kg/m<sup>2</sup>) vs 160 (56.5<math>\pm</math>10.4yrs, males 90%, BMI 31.7<math>\pm</math>6.9 kg/m<sup>2</sup>) age-gender matched control</p> <p>Questionnaire study</p> <p>Without known neurological illness.</p> <p>Severe vehicle accidents</p> | Doesn't mention CPAP duration | 3b | <p>The accident rates in both patients and the control group were greater than the rate of 0.02 "accidents due to sleepiness" per one million km. Patients with AHI &gt;34/h were more often involved in motor vehicle accidents (12 patients = 19% vs. 4 patients = 6%; p&lt;0.05) and had significantly more MVA per one million driven km than those with AHI = 10- 34/h; vs. 1.1; p&lt;0.05.</p> <p>nCPAP in 85 OSA patients <math>\rightarrow</math> the motor vehicle accident rate dropped from 10.6 to 2.7 per million km (p&lt;0.05).</p> | <p>PSG</p> <p>Patient were compliant to CPAP</p> <p>Swiss driving population</p> <p>No data on CPAP compliance</p> |

|                       |                    |                                                                                                                                                                                                                                                                                                              |                |    |                                                                                                                                                                                                                                                                                                                                                                                                                                                                                                                                                                                                                                                                                                                                                                                                                                                                          |                                                    |
|-----------------------|--------------------|--------------------------------------------------------------------------------------------------------------------------------------------------------------------------------------------------------------------------------------------------------------------------------------------------------------|----------------|----|--------------------------------------------------------------------------------------------------------------------------------------------------------------------------------------------------------------------------------------------------------------------------------------------------------------------------------------------------------------------------------------------------------------------------------------------------------------------------------------------------------------------------------------------------------------------------------------------------------------------------------------------------------------------------------------------------------------------------------------------------------------------------------------------------------------------------------------------------------------------------|----------------------------------------------------|
|                       |                    | with costs above \$600 or personal injury were considered.                                                                                                                                                                                                                                                   |                |    | Patients with moderate to severe OSA have an up to fifteen-fold risk increase of MVA which can be reduced by adequate treatment.                                                                                                                                                                                                                                                                                                                                                                                                                                                                                                                                                                                                                                                                                                                                         |                                                    |
| Randerath, 2000 (172) | Cohort study       | <p>Daytime sleepiness, sustained attention.</p> <p>125 healthy volunteers, and two groups of 28 OSA patients each.</p> <p>Study A (125 subjects, 108 males), Study B (28 subjects, 26 men), Study C (28 subjects, 27 men): OSA patients underwent one attention test before and one after nCPAP therapy.</p> | 2 days of CPAP | 3b | <p>Study A: The error rate in volunteers without symptoms of sleep-related breathing disorders (51 persons) was 4.7 +/- 4.3% (number of errors 14.1 +/- 12.9), 95% CI: 1.2 (number of errors 3.6). No dependence of the error rate on age, BMI or sex was found. In persons with a history of apnoeic events (n = 10), the error rate was 10.6 +/- 10.0% (number of errors 31.8 +/- 30), in those with more than two accidents during the last 5 years (n = 4), it was increased to 15.3 +/- 9.7% (number of errors 45.9 +/- 29.1).</p> <p>Study B: Among OSA patients, no significant learning effect was seen, and prolongation of the test duration beyond 30 min had no effect on the test results. Study C: The error rate improved significantly with nCPAP [10.6 +/- 13.5 vs. 6.4 +/- 8.9% (number of errors 31.8 +/- 40.5 vs. 19.2 +/- 26.7), p &lt; 0.001].</p> | <p>MSTL, MWT</p> <p>No data on CPAP compliance</p> |
| George, 2001 (173)    | Case-control study | Group of patients with OSA before and after treatment with CPAP, compared with a control group matched for                                                                                                                                                                                                   | 3 years        | 3b | Untreated patients with OSA had more MVCs than controls (mean (SD) MVCs/driver/year 0.18 (0.29) v 0.06 (0.17), p<0.001). Following CPAP treatment, the number of MVCs/driver/year fell to normal (0.06 (0.17)) while, in controls, the                                                                                                                                                                                                                                                                                                                                                                                                                                                                                                                                                                                                                                   | <p>PSG</p> <p>Male/females?</p>                    |

|                        |                    |                                                                                                                                                                                                                                                                                                                                                                                              |                                      |    |                                                                                                                                                                                                                                                                                                                                                                                                                                                                                                                                                                                                  |                                                                                                              |
|------------------------|--------------------|----------------------------------------------------------------------------------------------------------------------------------------------------------------------------------------------------------------------------------------------------------------------------------------------------------------------------------------------------------------------------------------------|--------------------------------------|----|--------------------------------------------------------------------------------------------------------------------------------------------------------------------------------------------------------------------------------------------------------------------------------------------------------------------------------------------------------------------------------------------------------------------------------------------------------------------------------------------------------------------------------------------------------------------------------------------------|--------------------------------------------------------------------------------------------------------------|
|                        |                    | <p>age, sex, and type of driver's license (commercial or noncommercial).</p> <p>210 patients of mean (SD) age 52 (11) years, BMI 35.5 (10) kg/m<sup>2</sup>, AHI 54 (29) events/h.</p> <p>MVC records compared for 3 years before and after CPAP therapy.</p> <p>182 were current users, 27 were non-users (on no other treatment), 5 patients had had surgery, and 6 patients had died.</p> |                                      |    | <p>MVC rate was unchanged over time (0.06 (0.17) v 0.07 (0.18), p=NS). Thus, the change in MVCs over time between the groups was very significant (change = -0.12 (95% CI -0.17 to -0.06), p&lt;0.001)). The MVC rate in untreated patients (n=27) remained high over time. Most of the patients with OSA did not have any collisions.</p> <p>Driving exposure was not different following CPAP.</p> <p>Conclusions—The risk of MVCs due to OSA is removed when patients are treated with CPAP. As such, any restrictions on driving because of OSA could be safely removed after treatment.</p> | <p>BMI unchanged</p> <p>Ontario</p> <p>Self reported CPAP use [5.9 (0.6) hours/day]</p>                      |
| Turkington, 2004 (142) | Case-control study | <p>18 patients(94% males), 49.9yrs with severe SAHS (RDI &gt; 50 events/h) performed a driving simulator test at baseline (before treatment) and at days 1, 3, and 7 of a 2 week CPAP trial period. CPAP was then discontinued and the</p>                                                                                                                                                   | 2 weeks of CPAP and 1 week follow-up | 3b | <p>Significant improvements in tracking error (p = 0.004), reaction time (p = 0.036), and the number of off road events per hour (p = 0.032) were seen in the CPAP treated group compared with the controls at 7 days.</p> <p>There were no changes in driving simulator test results in the control patients over the seven tests, suggesting that any learning effect of repeated tests is minimal.</p>                                                                                                                                                                                        | <p>Known patients with OSAS.</p> <p>Compliance to CPAP evaluated(4.9 (1.5) hours)</p> <p>Discontinuation</p> |

|                   |                               |                                                                                                                                                                                                                                                                                                                  |          |    |                                                                                                                                                                                                                                                                                                                                                                                                                                                                             |                                              |
|-------------------|-------------------------------|------------------------------------------------------------------------------------------------------------------------------------------------------------------------------------------------------------------------------------------------------------------------------------------------------------------|----------|----|-----------------------------------------------------------------------------------------------------------------------------------------------------------------------------------------------------------------------------------------------------------------------------------------------------------------------------------------------------------------------------------------------------------------------------------------------------------------------------|----------------------------------------------|
|                   |                               | <p>patients performed three further driving simulator tests after 1, 3, and 7 days.</p> <p>18 patients, 51.7yr with severe SAHS acted as controls</p> <p>No significant differences data between patients treated with CPAP and those who acted as controls.</p>                                                 |          |    | <p>Hypersomnolence (Stanford sleepiness scale) significantly improved in the treated patients while on CPAP (median (IQR) 3 (2–4) at baseline v 2 (2–3) at day 3 on CPAP, <math>p=0.004</math>). After discontinuation of CPAP, sleepiness once again deteriorated (3 (2–4) at day 7 of CPAP, <math>p=0.05</math>). There was no significant change in subjective hypersomnolence in the control group over the study period (3 (2–4) at baseline, <math>p=0.65</math>)</p> | of CPAP                                      |
| Mazza, 2006 (144) | Randomised case-control study | <p>20 pts OSAS (18 males and 2 females) 54.1+/-5.9yr, RDI=44.4+/-13/h and 20 non-obese and non-snoring control subjects (17 males and 3 females) 52.2+/-8.3yr, matched for age, educational level, and number of years of driving included. 10 patients from each group agreed to participate 3 months after</p> | 3 months | 3b | <p>Patients exhibited much longer reaction times than controls, leading to a lengthening of the vehicles stopping distance of 8.8 m at 40 km/h and to twice the number of collisions. Patients did not demonstrate objective sleepiness or selective and sustained attention deficits. Divided attention deficits were found. However, they did not allow the prediction of real driving impairment.</p> <p>After CPAP treatment, there was no longer any</p>               | <p>PSG</p> <p>No data on CPAP compliance</p> |

|                     |                    |                                                                                                                                                                                                                                                                                                                                                                                                                                                                                    |            |    |                                                                                                                                                                                                                      |                                                                           |
|---------------------|--------------------|------------------------------------------------------------------------------------------------------------------------------------------------------------------------------------------------------------------------------------------------------------------------------------------------------------------------------------------------------------------------------------------------------------------------------------------------------------------------------------|------------|----|----------------------------------------------------------------------------------------------------------------------------------------------------------------------------------------------------------------------|---------------------------------------------------------------------------|
|                     |                    | <p>CPAP treatment.</p> <p>Subjects with history of neurological or psychiatric disease, chronic lung disease, uncorrected visual or auditive impairment, chronic sedative intake or alcohol abuse were excluded.</p> <p>Parameters: reaction time; distance to stop and number of collisions on the platform; maintenance of wakefulness; and sustained, selective and divided attention in laboratory. OSLER test, Continuous Performance Test (CPT), Driving Simulator Test.</p> |            |    | <p>difference between patients and controls regarding driving and attention performances.</p>                                                                                                                        |                                                                           |
| Hoekema, 2007 (145) | Case-control study | <p>20 OSAHS (17 males, age <math>48.7 \pm 11.2</math> yrs) patients and 16 control (13 males, age <math>48.7 \pm 10</math> yrs) subjects during a 25-min driving</p>                                                                                                                                                                                                                                                                                                               | 2-3 months | 3b | <p>Total number of lapses of attention during driving significantly higher in OSAHS patients vs control subjects.</p> <p>Total number of lapses of attention was significantly decreased in both the OA and CPAP</p> | <p>Simulated driving performance</p> <p>Comparing driving performance</p> |

|                     |                    |                                                                                                                                                                                                                                                                                                                                                                                                                                                                                                                               |          |    |                                                                                                                                                                                                                                                                                                                                                                                                                                                                                                                                                                                                                                                                                                                                                                                                                                                                                 |                                                                                                                                                     |
|---------------------|--------------------|-------------------------------------------------------------------------------------------------------------------------------------------------------------------------------------------------------------------------------------------------------------------------------------------------------------------------------------------------------------------------------------------------------------------------------------------------------------------------------------------------------------------------------|----------|----|---------------------------------------------------------------------------------------------------------------------------------------------------------------------------------------------------------------------------------------------------------------------------------------------------------------------------------------------------------------------------------------------------------------------------------------------------------------------------------------------------------------------------------------------------------------------------------------------------------------------------------------------------------------------------------------------------------------------------------------------------------------------------------------------------------------------------------------------------------------------------------|-----------------------------------------------------------------------------------------------------------------------------------------------------|
|                     |                    | test. After randomisation, 10 patients started OA and CPAP therapy.                                                                                                                                                                                                                                                                                                                                                                                                                                                           |          |    | group. When comparing driving performance between the OA and CPAP group, no significant differences were noted.                                                                                                                                                                                                                                                                                                                                                                                                                                                                                                                                                                                                                                                                                                                                                                 | between the OA and CPAP group<br><br>CPAP use evaluated (6.8±0.6h/night)                                                                            |
| Vakulin, 2011 (147) | Case-control study | OSA patients (n=11, males=10, AHI>45/h, PSG), vs control (n=9, males=7).<br><br>Exclusion: professional driver or shift worker; history of driving < 2 y or < 2 h per week; significant medical comorbidities, periodic limb movement, past head injury or depression; medications that may influence sleep and daytime behavioral function (e.g., antihistamines, opiates, antidepressants); history of alcohol abuse or current use of recreational drugs. Control subjects were also excluded if they obtained higher than | 3 months | 3b | At baseline, OSA subjects had significantly greater steering deviation compared to controls (mean [95% CI], OSA group, 49.9 cm [43.7 to 56.0 cm] vs control group, 34.9 cm [28.1 to 41.7 cm], p = 0.003). Following ~3 months of CPAP treatment (mean ± SD 6.0 ± 1.4 h/night), steering deviation in OSA subjects improved by an average of 3.1 cm (CI, 1.4 to 4.9), p < 0.001, while no significant steering changes were observed in the control group. Despite the improvement, steering deviation in the OSA group remained significantly higher than in controls (OSA group, 46.7 cm [CI, 40.6 to 52.8 cm] vs control group, 36.1 cm [CI, 29.3 to 42.9 cm], p = 0.025).<br><br>While driving simulator performance improved after ~3 months of CPAP treatment with high adherence in patients with severe OSA, performance remained impaired compared to control subjects. | PSG<br><br>Some neurobehavioral deficits in patients with severe OSA are not fully reversed by treatment.<br><br>Mean CPAP use (6.0 ± 1.4 h/night), |

|                     |                                                      |                                                                                                                                                                                                                                                      |                   |    |                                                                                                                                                                                                                                                 |                                                                                     |
|---------------------|------------------------------------------------------|------------------------------------------------------------------------------------------------------------------------------------------------------------------------------------------------------------------------------------------------------|-------------------|----|-------------------------------------------------------------------------------------------------------------------------------------------------------------------------------------------------------------------------------------------------|-------------------------------------------------------------------------------------|
|                     |                                                      | <p>normal scores on sleep quality and daytime drowsiness questionnaires.</p> <p>Driving simulator performance assessed at base-line and 3 months later, with OSA patients treated with CPAP during the interval.</p>                                 |                   |    |                                                                                                                                                                                                                                                 |                                                                                     |
| Filtner, 2012 (148) | Case-control study, follow-up one night without CPAP | <p>11 CPAP-treated, 50-75yrs old males, with OSA, completed a 2h afternoon simulated, realistic, monotonous drive in an instrumented car, twice – following one night with CPAP and without CPAP</p> <p>Age 65.6±2.3, BMI 33.1±1.8, ESS 5.2±0.7.</p> | One night of CPAP | 3b | <p>Withdrawal of CPAP markedly increased sleep disturbance and led to significantly more incidents, a shorter safe driving duration.</p> <p>Highly significant correlation between subjective and EEG measures of sleepiness</p>                | <p>All were men</p> <p>One night without CPAP</p> <p>No data on CPAP compliance</p> |
| Sangal, 2012 (174)  | Case-control study                                   | <p>256 adults (87 males, 169 females; 44 retook the tests a month later), 49 evaluated with PSG and MSLT for narcolepsy and 137 OSA patients treated</p>                                                                                             | One month         | 3b | <p>Factor analysis revealed 2 factors—general wakefulness inability and fatigue (GWIF), driving wakefulness inability and fatigue (DWIF).</p> <p>No significant correlations found in the OSA patients between ESS, SWIFT, GWIF, or DWIF on</p> | <p>PSG</p> <p>CPAP compliance</p> <p>83.2% subjects were compliant (use ≥</p>       |

|  |  |                                                                                                                                                                                                                                                      |  |                                                                                                                                                                                                                                                                                                                                                                                                                                                                                                                                                                                                                                         |                                                        |
|--|--|------------------------------------------------------------------------------------------------------------------------------------------------------------------------------------------------------------------------------------------------------|--|-----------------------------------------------------------------------------------------------------------------------------------------------------------------------------------------------------------------------------------------------------------------------------------------------------------------------------------------------------------------------------------------------------------------------------------------------------------------------------------------------------------------------------------------------------------------------------------------------------------------------------------------|--------------------------------------------------------|
|  |  | <p>with CPAP.</p> <p>114 of 137 (83.2%) subjects were compliant (use <math>\geq 4</math> h/night) for <math>\geq 70\%</math> of nights.</p> <p>Test for Sleepiness-Wakefulness Inability and Fatigue (SWIFT) and Epworth Sleepiness Scale (ESS).</p> |  | <p>the one hand, and sleep efficiency.</p> <p>SWIFT (<math>r = 0.16</math>, <math>p = 0.006</math>), GWIF (<math>r = 0.15</math>, <math>p = 0.009</math>) and DWIF (<math>r = 0.14</math>, <math>p = 0.023</math>), but not ESS, were significantly correlated with arousal index. ESS (<math>r = 0.14</math>, <math>p = 0.018</math>) and GWIF (<math>r = 0.14</math>, <math>p = 0.022</math>), but not SWIFT or DWIF, were significantly correlated with AHI.</p> <p>ESS, SWIFT, GWIF, and DWIF improved with CPAP</p> <p>Improvements in SWIFT, GWIF, and DWIF (but not ESS) were significantly correlated with CPAP compliance.</p> | <p>4 h/night) for <math>\geq 70\%</math> of nights</p> |
|--|--|------------------------------------------------------------------------------------------------------------------------------------------------------------------------------------------------------------------------------------------------------|--|-----------------------------------------------------------------------------------------------------------------------------------------------------------------------------------------------------------------------------------------------------------------------------------------------------------------------------------------------------------------------------------------------------------------------------------------------------------------------------------------------------------------------------------------------------------------------------------------------------------------------------------------|--------------------------------------------------------|

Abbreviations: AHI: Apnoea hypopnoea index; APAP: Automatic Positive Airway Pressure; BMI: Body mass index; CI: confidence interval; CPAP: continuous positive airway pressure; CPT: Continuous Performance Test; DADT: divided attention driving task; DWIF: driving wakefulness inability and fatigue; EDS: excessive daytime sleepiness; ESS: Epworth Sleepiness Scale; FOSQ: Functional Outcomes of Sleep Questionnaire; GLM: general linear model; GWIF: general wakefulness inability and fatigue ICT: inhibitory control test; MAD: Mandibular Advancement Devices; MOS-CF6: Medical Outcomes Study 6 Item Cognitive Functioning; MSLT: mean sleep latency test; MURT: multiple unprepared reaction time test; MVA: motor vehicle accidents; MVC: motor vehicle collision; MWT: Maintenance of Wakefulness Test; NS: not significant; OA: Oral Appliance; OR: Odds ratio; OSA: Obstructive sleep apnoea; OSAHS: Obstructive sleep apnoea hypopnoea syndrome OSAS: Obstructive sleep apnoea syndrome; OSLER: Oxford Sleep Resistance Test PLMD: Periodic limb movement disorder; PSQI: Pittsburgh Sleep Quality Index; PSG: Polysomnography; RLS: Restless Legs Syndrome; RDI: Respiratory Disturbance Index; SAHS: Sleep Apnea-hypopnea Syndrome; SaO<sub>2</sub>: oxygen saturation; SDB: Sleep Disorder Breathing; SDS: Self-related Depression Scale; SL: Sleep latency; TDDGs: truck drivers of dangerous goods.



## References

1. Al-Abri MA, Al-Adawi S, Al-Abri I, Al-Abri F, Dorvlo A, Wesonga R, Jaju S. Daytime Sleepiness Among Young Adult Omani Car Drivers. *Sultan Qaboos University medical journal* 2018; 18: e143-e148.
2. Gonçalves M, Amici R, Lucas R, Åkerstedt T, Cirignotta F, Horne J, Léger D, McNicholas WT, Partinen M, Téran-Santos J, Peigneux P, Grote L, National Representatives as Study C. Sleepiness at the wheel across Europe: a survey of 19 countries. *Journal of Sleep Research* 2015; 24: 242-253.
3. Quera Salva MA, Barbot F, Hartley S, Sauvagnac R, Vaugier I, Lofaso F, Philip P. Sleep disorders, sleepiness, and near-miss accidents among long-distance highway drivers in the summertime. *Sleep Med* 2014; 15: 23-26.
4. Philip P, Sagaspe P, Lagarde E, Leger D, Ohayon MM, Bioulac B, Boussuge J, Taillard J. Sleep disorders and accidental risk in a large group of regular registered highway drivers. *Sleep Medicine* 2010; 11: 973-979.
5. Vaz Fragoso CA, Araujo KL, Van Ness PH, Marottoli RA. Sleep disturbances and adverse driving events in a predominantly male cohort of active older drivers. *Journal of the American Geriatrics Society* 2010; 58: 1878-1884.
6. Vaz Fragoso CA, Araujo KL, Van Ness PH, Marottoli RA. Prevalence of sleep disturbances in a cohort of older drivers. *The journals of gerontology Series A, Biological sciences and medical sciences* 2008; 63: 715-723.
7. Guglielmi O, Magnavita N, Garbarino S. Sleep quality, obstructive sleep apnea, and psychological distress in truck drivers: a cross-sectional study. *Social psychiatry and psychiatric epidemiology* 2018; 53: 531-536.
8. Garbarino S, Durando P, Guglielmi O, Dini G, Bersi F, Fornarino S, Toletone A, Chiorri C, Magnavita N. Sleep Apnea, Sleep Debt and Daytime Sleepiness Are Independently Associated with Road Accidents. A Cross-Sectional Study on Truck Drivers. *PLoS ONE* 2016; 11: e0166262.
9. Zwahlen D, Jackowski C, Pfaffli M. Sleepiness, driving, and motor vehicle accidents: A questionnaire-based survey. *Journal of forensic and legal medicine* 2016; 44: 183-187.
10. Ebrahimi MH, Sadeghi M, Dehghani M, Niiat KS. Sleep habits and road traffic accident risk for Iranian occupational drivers. *International journal of occupational medicine and environmental health* 2015; 28: 305-312.
11. Demirdogen Cetinoglu E, Gorek Dilektasli A, Demir NA, Ozkaya G, Acet NA, Durmus E, Ursavas A, Karadag M, Ege E. The relationship between driving simulation performance and obstructive sleep apnoea risk, daytime sleepiness, obesity and road traffic accident history of commercial drivers in Turkey. *Sleep Breath* 2015; 19: 865-872.
12. Barger LK, Rajaratnam SM, Wang W, O'Brien CS, Sullivan JP, Qadri S, Lockley SW, Czeisler CA. Common sleep disorders increase risk of motor vehicle crashes and adverse health outcomes in firefighters. *J Clin Sleep Med* 2015; 11: 233-240.
13. Catarino R, Spratley J, Catarino I, Lunet N, Pais-Clemente M. Sleepiness and sleep-disordered breathing in truck drivers. *Sleep Breath* 2014; 18: 59-68.
14. Amra B, Dorali R, Mortazavi S, Golshan M, Farajzadegan Z, Fietze I, Penzel T. Sleep apnea symptoms and accident risk factors in Persian commercial vehicle drivers. *Sleep Breath* 2012; 16: 187-191.
15. Razmpa E, Sadegh Niat K, Saedi B. Urban bus drivers' sleep problems and crash accidents. *Indian journal of otolaryngology and head and neck surgery : official publication of the Association of Otolaryngologists of India* 2011; 63: 269-273.
16. Braeckman L, Verpraet R, Van Risseghem M, Pevernagie D, De Bacquer D. Prevalence and correlates of poor sleep quality and daytime sleepiness in Belgian truck drivers. *Chronobiology international* 2011; 28: 126-134.
17. Vennelle M, Engleman HM, Douglas NJ. Sleepiness and sleep-related accidents in commercial bus drivers. *Sleep Breath* 2010; 14: 39-42.

18. Garbarino S, Pitidis A, Giustini M, Taggi F, Sanna A. Motor vehicle accidents and obstructive sleep apnea syndrome: A methodology to calculate the related burden of injuries. *Chronic Respiratory Disease* 2015; 12: 320-328.
19. Tregear S, Reston J, Schoelles K, Phillips B. Obstructive sleep apnea and risk of motor vehicle crash: systematic review and meta-analysis. *J Clin Sleep Med* 2009; 5: 573-581.
20. Ellen RL, Marshall SC, Palayew M, Molnar FJ, Wilson KG, Man-Son-Hing M. Systematic review of motor vehicle crash risk in persons with sleep apnea. *J Clin Sleep Med* 2006; 2: 193-200.
21. Gottlieb DJ, Ellenbogen JM, Bianchi MT, Czeisler CA. Sleep deficiency and motor vehicle crash risk in the general population: a prospective cohort study. *BMC medicine* 2018; 16: 44.
22. Howard ME, Desai AV, Grunstein RR, Hukins C, Armstrong JG, Joffe D, Swann P, Campbell DA, Pierce RJ. Sleepiness, Sleep-disordered Breathing, and Accident Risk Factors in Commercial Vehicle Drivers. *American Journal of Respiratory and Critical Care Medicine* 2004; 170: 1014-1021.
23. Shiomi T, Arita AT, Sasanabe R, Banno K, Yamakawa H, Hasegawa R, Ozeki K, Okada M, Ito A. Falling asleep while driving and automobile accidents among patients with obstructive sleep apnea-hypopnea syndrome. *Psychiatry Clin Neurosci* 2002; 56: 333-334.
24. Masa JF, Rubio M, Findley LJ. Habitually sleepy drivers have a high frequency of automobile crashes associated with respiratory disorders during sleep. *Am J Respir Crit Care Med* 2000; 162: 1407-1412.
25. Teran-Santos J, Jimenez-Gomez A, Cordero-Guevara J. The association between sleep apnea and the risk of traffic accidents. Cooperative Group Burgos-Santander. *N Engl J Med* 1999; 340: 847-851.
26. Young T, Blustein J, Finn L, Palta M. Sleep-disordered breathing and motor vehicle accidents in a population-based sample of employed adults. *Sleep* 1997; 20: 608-613.
27. Kingshott RN, Cowan JO, Jones DR, Flannery EM, Smith AD, Herbison GP, Taylor DR. The role of sleep-disordered breathing, daytime sleepiness, and impaired performance in motor vehicle crashes-a case control study. *Sleep Breath* 2004; 8: 61-72.
28. Wu WT, Tsai SS, Liao HY, Lin YJ, Lin MH, Wu TN, Shih TS, Liou SH. Usefulness of overnight pulse oximeter as the sleep assessment tool to assess the 6-year risk of road traffic collision: evidence from the Taiwan Bus Driver Cohort Study. *International journal of epidemiology* 2017; 46: 266-277.
29. Garbarino S, Guglielmi O, Campus C, Mascialino B, Pizzorni D, Nobili L, Mancardi GL, Ferini-Strambi L. Screening, diagnosis, and management of obstructive sleep apnea in dangerous-goods truck drivers: to be aware or not? *Sleep Med* 2016; 25: 98-104.
30. Meuleners L, Fraser ML, Govorko MH, Stevenson MR. Obstructive Sleep Apnea, Health-Related Factors, and Long Distance Heavy Vehicle Crashes in Western Australia: A Case Control Study. *Journal of Clinical Sleep Medicine : JCSM : Official Publication of the American Academy of Sleep Medicine* 2015; 11: 413-418.
31. Karimi M, Hedner J, Habel H, Nerman O, Grote L. Sleep apnea-related risk of motor vehicle accidents is reduced by continuous positive airway pressure: Swedish Traffic Accident Registry data. *Sleep* 2015; 38: 341-349.
32. Stevenson MR, Elkington J, Sharwood L, Meuleners L, Ivers R, Boufous S, Williamson A, Haworth N, Quinlan M, Grunstein R, Norton R, Wong K. The Role of Sleepiness, Sleep Disorders, and the Work Environment on Heavy-Vehicle Crashes in 2 Australian States. *American Journal of Epidemiology* 2014; 179: 594-601.
33. Karimi M, Eder DN, Eskandari D, Zou D, Hedner JA, Grote L. Impaired vigilance and increased accident rate in public transport operators is associated with sleep disorders. *Accident; analysis and prevention* 2013; 51: 208-214.
34. Carter N, Ulfberg J, Nystrom B, Edling C. Sleep debt, sleepiness and accidents among males in the general population and male professional drivers. *Accident; analysis and prevention* 2003; 35: 613-617.

35. Matsui K, Sasai-Sakuma T, Ishigooka J, Inoue Y. Insufficient sleep rather than the apnea-hypopnea index can be associated with sleepiness-related driving problems of Japanese obstructive sleep apnea syndrome patients residing in metropolitan areas. *Sleep Med* 2017; 33: 19-22.
36. Arita A, Sasanabe R, Hasegawa R, Nomura A, Hori R, Mano M, Konishi N, Shiomi T. Risk factors for automobile accidents caused by falling asleep while driving in obstructive sleep apnea syndrome. *Sleep & Breathing = Schlaf & Atmung* 2015; 19: 1229-1234.
37. Basoglu OK, Tasbakan MS. Elevated risk of sleepiness-related motor vehicle accidents in patients with obstructive sleep apnea syndrome: a case-control study. *Traffic injury prevention* 2014; 15: 470-476.
38. Ward KL, Hillman DR, James A, Bremner AP, Simpson L, Cooper MN, Palmer LJ, Fedson AC, Mukherjee S. Excessive Daytime Sleepiness Increases the Risk of Motor Vehicle Crash in Obstructive Sleep Apnea. *Journal of Clinical Sleep Medicine : JCSM : Official Publication of the American Academy of Sleep Medicine* 2013; 9: 1013-1021.
39. Komada Y, Nishida Y, Namba K, Abe T, Tsuiki S, Inoue Y. Elevated Risk of Motor Vehicle Accident for Male Drivers with Obstructive Sleep Apnea Syndrome in the Tokyo Metropolitan Area. *The Tohoku Journal of Experimental Medicine* 2009; 219: 11-16.
40. Mulgrew AT, Nasvadi G, Butt A, Cheema R, Fox N, Fleetham JA, Ryan CF, Cooper P, Ayas NT. Risk and severity of motor vehicle crashes in patients with obstructive sleep apnoea/hypopnoea. *Thorax* 2008; 63: 536-541.
41. Lloberes P, Levy G, Descals C, Sampol G, Roca A, Sagales T, de la Calzada MD. Self-reported sleepiness while driving as a risk factor for traffic accidents in patients with obstructive sleep apnoea syndrome and in non-apnoeic snorers. *Respir Med* 2000; 94: 971-976.
42. Horstmann S, Hess CW, Bassetti C, Gugger M, Mathis J. Sleepiness-related accidents in sleep apnea patients. *Sleep* 2000; 23: 383-389.
43. Barbe, Pericas J, Munoz A, Findley L, Anto JM, Agusti AG. Automobile accidents in patients with sleep apnea syndrome. An epidemiological and mechanistic study. *American Journal of Respiratory and Critical Care Medicine* 1998; 158: 18-22.
44. Findley LJ, Unverzagt ME, Suratt PM. Automobile Accidents Involving Patients with Obstructive Sleep Apnea. *American Review of Respiratory Disease* 1988; 138: 337-340.
45. Wu H, Yan-Go F. Self-reported automobile accidents involving patients with obstructive sleep apnea. *Neurology* 1996; 46: 1254-1257.
46. Mendelson WB. The relationship of sleepiness and blood pressure to respiratory variables in obstructive sleep apnea. *Chest* 1995; 108: 966-972.
47. Zamagni M, Sforza E, Boudewijns A, Petiau C, Krieger J. Respiratory effort. A factor contributing to sleep propensity in patients with obstructive sleep apnea. *Chest* 1996; 109: 651-658.
48. Bennett LS, Langford BA, Stradling JR, Davies RJ. Sleep fragmentation indices as predictors of daytime sleepiness and nCPAP response in obstructive sleep apnea. *Am J Respir Crit Care Med* 1998; 158: 778-786.
49. Leng PH, Low SY, Hsu A, Chong SF. The clinical predictors of sleepiness correlated with the multiple sleep latency test in an Asian Singapore population. *Sleep* 2003; 26: 878-881.
50. Seneviratne U, Puvanendran K. Excessive daytime sleepiness in obstructive sleep apnea: prevalence, severity, and predictors. *Sleep Med* 2004; 5: 339-343.
51. Gonsalves MA, Paiva T, Ramos E, Guilleminault C. Obstructive Sleep Apnea Syndrome, Sleepiness, and Quality of Life. *Chest* 2004; 125: 2091-2096.
52. Bixler EO, Vgontzas AN, Lin HM, Calhoun SL, Vela-Bueno A, Kales A. Excessive daytime sleepiness in a general population sample: the role of sleep apnea, age, obesity, diabetes, and depression. *The Journal of clinical endocrinology and metabolism* 2005; 90: 4510-4515.
53. Kapur VK, Baldwin CM, Resnick HE, Gottlieb DJ, Nieto FJ. Sleepiness in patients with moderate to severe sleep-disordered breathing. *Sleep* 2005; 28: 472-477.

54. Mediano O, Barcelo A, de la Pena M, Gozal D, Agusti A, Barbe F. Daytime sleepiness and polysomnographic variables in sleep apnoea patients. *Eur Respir J* 2007; 30: 110-113.
55. Barcelo A, Barbe F, de la Pena M, Martinez P, Soriano JB, Pierola J, Agusti AG. Insulin resistance and daytime sleepiness in patients with sleep apnoea. *Thorax* 2008; 63: 946-950.
56. Roure N, Gomez S, Mediano O, Duran J, Pena Mde L, Capote F, Teran J, Masa JF, Alonso ML, Corral J, Sanchez-Armengod A, Martinez C, Barcelo A, Gozal D, Marin JM, Barbe F. Daytime sleepiness and polysomnography in obstructive sleep apnea patients. *Sleep Med* 2008; 9: 727-731.
57. Koutsourelakis I, Perraki E, Bonakis A, Vagiakis E, Roussos C, Zakynthinos S. Determinants of subjective sleepiness in suspected obstructive sleep apnoea. *J Sleep Res* 2008; 17: 437-443.
58. Bausmer U, Gouveris H, Selivanova O, Goepel B, Mann W. Correlation of the Epworth Sleepiness Scale with respiratory sleep parameters in patients with sleep-related breathing disorders and upper airway pathology. *European archives of oto-rhino-laryngology : official journal of the European Federation of Oto-Rhino-Laryngological Societies (EUFOS) : affiliated with the German Society for Oto-Rhino-Laryngology - Head and Neck Surgery* 2010; 267: 1645-1648.
59. Oksenberg A, Arons E, Nasser K, Shneor O, Radwan H, Silverberg DS. Severe obstructive sleep apnea: sleepy versus nonsleepy patients. *The Laryngoscope* 2010; 120: 643-648.
60. Ishman SL, Cavey RM, Mettel TL, Gourin CG. Depression, sleepiness, and disease severity in patients with obstructive sleep apnea. *The Laryngoscope* 2010; 120: 2331-2335.
61. Chen R, Xiong KP, Lian YX, Huang JY, Zhao MY, Li JX, Liu CF. Daytime sleepiness and its determining factors in Chinese obstructive sleep apnea patients. *Sleep Breath* 2011; 15: 129-135.
62. Sanchez-de-la-Torre M, Barcelo A, Pierola J, Esquinas C, de la Pena M, Duran-Cantolla J, Capote F, Masa JF, Marin JM, Vila M, Cao G, Martinez M, de Lecea L, Gozal D, Montserrat JM, Barbe F. Plasma levels of neuropeptides and metabolic hormones, and sleepiness in obstructive sleep apnea. *Respir Med* 2011; 105: 1954-1960.
63. Sun Y, Ning Y, Huang L, Lei F, Li Z, Zhou G, Tang X. Polysomnographic characteristics of daytime sleepiness in obstructive sleep apnea syndrome. *Sleep Breath* 2012; 16: 375-381.
64. Pamidi S, Knutson KL, Ghods F, Mokhlesi B. Depressive symptoms and obesity as predictors of sleepiness and quality of life in patients with REM-related obstructive sleep apnea: cross-sectional analysis of a large clinical population. *Sleep Med* 2011; 12: 827-831.
65. Bonsignore MR, Esquinas C, Barcelo A, Sanchez-de-la-Torre M, Paterno A, Duran-Cantolla J, Marin JM, Barbe F. Metabolic syndrome, insulin resistance and sleepiness in real-life obstructive sleep apnoea. *Eur Respir J* 2012; 39: 1136-1143.
66. Cai SJ, Chen R, Zhang YL, Xiong KP, Lian YX, Li J, Shen JC, Liu CF. Correlation of Epworth Sleepiness Scale with multiple sleep latency test and its diagnostic accuracy in assessing excessive daytime sleepiness in patients with obstructive sleep apnea hypopnea syndrome. *Chinese medical journal* 2013; 126: 3245-3250.
67. Rey de Castro J, Rosales-Mayor E. Clinical and polysomnographic differences between OSAH patients with/without excessive daytime sleepiness. *Sleep Breath* 2013; 17: 1079-1086.
68. Jacobsen JH, Shi L, Mokhlesi B. Factors associated with excessive daytime sleepiness in patients with severe obstructive sleep apnea. *Sleep Breath* 2013; 17: 629-635.
69. Slater G, Pengo MF, Kosky C, Steier J. Obesity as an independent predictor of subjective excessive daytime sleepiness. *Respir Med* 2013; 107: 305-309.
70. Uysal A, Liendo C, McCarty DE, Kim PY, Paxson C, Chesson AL, Marino AA. Nocturnal hypoxemia biomarker predicts sleepiness in patients with severe obstructive sleep apnea. *Sleep Breath* 2014; 18: 77-84.
71. Huamani C, Rey de Castro J, Mezones-Holguin E. Sleepiness and nocturnal hypoxemia in Peruvian men with obstructive sleep apnea. *Sleep Breath* 2014; 18: 467-473.
72. Corlateanu A, Pylchenko S, Sircu V, Botnaru V. Predictors of daytime sleepiness in patients with obstructive sleep apnea. *Pneumologia (Bucharest, Romania)* 2015; 64: 21-25.

73. Adams RJ, Appleton SL, Vakulin A, Lang C, Martin SA, Taylor AW, McEvoy RD, Antic NA, Catcheside PG, Wittert GA. Association of daytime sleepiness with obstructive sleep apnoea and comorbidities varies by sleepiness definition in a population cohort of men. *Respirology* 2016; 21: 1314-1321.
74. Ryu HS, Lee SA, Lee GH, Chung YS, Kim WS. Subjective apnoea symptoms are associated with daytime sleepiness in patients with moderate and severe obstructive sleep apnoea: a retrospective study. *Clinical otolaryngology : official journal of ENT-UK ; official journal of Netherlands Society for Oto-Rhino-Laryngology & Cervico-Facial Surgery* 2016; 41: 395-401.
75. Huang J-f, Chen L-D, Lin Q-C, Chen G-P, Yu Y-H, Huang J-C, Zhao J-M. The relationship between excessive daytime sleepiness and metabolic syndrome in severe obstructive sleep apnea syndrome. *The Clinical Respiratory Journal* 2016; 10: 714-721.
76. Lang CJ, Appleton SL, Vakulin A, McEvoy RD, Vincent AD, Wittert GA, Martin SA, Grant JF, Taylor AW, Antic N, Catcheside PG, Adams RJ. Associations of Undiagnosed Obstructive Sleep Apnea and Excessive Daytime Sleepiness With Depression: An Australian Population Study. *J Clin Sleep Med* 2017; 13: 575-582.
77. Kim SA, Koo BB, Kim DE, Hwangbo Y, Yang KI. Factors affecting fatigue severity in patients with obstructive sleep apnea. *The Clinical Respiratory Journal* 2017; 11: 1045-1051.
78. Martynowicz H, Skomro R, Gac P, Mazur G, Porebska I, Brylka A, Nowak W, Zielinski M, Wojakowska A, Poreba R. The influence of hypertension on daytime sleepiness in obstructive sleep apnea. *Journal of the American Society of Hypertension : JASH* 2017; 11: 295-302.
79. Kim H, Thomas RJ, Yun CH, Au R, Lee SK, Lee S, Shin C. Association of Mild Obstructive Sleep Apnea With Cognitive Performance, Excessive Daytime Sleepiness, and Quality of Life in the General Population: The Korean Genome and Epidemiology Study (KoGES). *Sleep* 2017; 40.
80. Li Y, Vgontzas A, Kritikou I, Fernandez-Mendoza J, Basta M, Pejovic S, Gaines J, Bixler EO. Psychomotor Vigilance Test and Its Association With Daytime Sleepiness and Inflammation in Sleep Apnea: Clinical Implications. *J Clin Sleep Med* 2017; 13: 1049-1056.
81. Li Y, Vgontzas AN, Fernandez-Mendoza J, Kritikou I, Basta M, Pejovic S, Gaines J, Bixler EO. Objective, but Not Subjective, Sleepiness is Associated With Inflammation in Sleep Apnea. *Sleep* 2017; 40.
82. Chen YC, Chen KD, Su MC, Chin CH, Chen CJ, Liou CW, Chen TW, Chang YC, Huang KT, Wang CC, Wang TY, Chang JC, Lin YY, Zheng YX, Lin MC, Hsiao CC. Genome-wide gene expression array identifies novel genes related to disease severity and excessive daytime sleepiness in patients with obstructive sleep apnea. *PLoS One* 2017; 12: e0176575.
83. Fu Y, Xu H, Xia Y, Qian Y, Li X, Zou J, Wang Y, Meng L, Tang X, Zhu H, Zhou H, Su K, Yu D, Yi H, Guan J, Yin S. Excessive daytime sleepiness and metabolic syndrome in men with obstructive sleep apnea: a large cross-sectional study. *Oncotarget* 2017; 8: 79693-79702.
84. Prasad B, Steffen AD, Van Dongen HPA, Pack FM, Strakovsky I, Staley B, Dinges DF, Maislin G, Pack AI, Weaver TE. Determinants of sleepiness in obstructive sleep apnea. *Sleep* 2018; 41.
85. D'Rozario AL, Field CJ, Hoyos CM, Naismith SL, Dungan GC, Wong KKH, Grunstein RR, Bartlett DJ. Impaired Neurobehavioural Performance in Untreated Obstructive Sleep Apnea Patients Using a Novel Standardised Test Battery. *Frontiers in surgery* 2018; 5: 35.
86. Nigro CA, Dibur E, Borsini E, Malnis S, Ernst G, Bledel I, Gonzalez S, Arce A, Nogueira F. The influence of gender on symptoms associated with obstructive sleep apnea. *Sleep Breath* 2018; 22: 683-693.
87. Ng WL, Stevenson CE, Wong E, Tanamas S, Boelsen-Robinson T, Shaw JE, Naughton MT, Dixon J, Peeters A. Does intentional weight loss improve daytime sleepiness? A systematic review and meta-analysis. *Obesity reviews : an official journal of the International Association for the Study of Obesity* 2017; 18: 460-475.
88. Vgontzas AN, Bixler EO, Tan TL, Kantner D, Martin LF, Kales A. Obesity without sleep apnea is associated with daytime sleepiness. *Archives of internal medicine* 1998; 158: 1333-1337.

89. Resta O, Foschino-Barbaro MP, Legari G, Talamo S, Bonfitto P, Palumbo A, Minenna A, Giorgino R, De Pergola G. Sleep-related breathing disorders, loud snoring and excessive daytime sleepiness in obese subjects. *International journal of obesity and related metabolic disorders : journal of the International Association for the Study of Obesity* 2001; 25: 669-675.
90. Resta O, Foschino Barbaro MP, Bonfitto P, Giliberti T, Depalo A, Pannacciulli N, De Pergola G. Low sleep quality and daytime sleepiness in obese patients without obstructive sleep apnoea syndrome. *Journal of internal medicine* 2003; 253: 536-543.
91. Dixon JB, Schachter LM, O'Brien PE. Polysomnography before and after weight loss in obese patients with severe sleep apnea. *International journal of obesity (2005)* 2005; 29: 1048-1054.
92. Dixon JB, Dixon ME, Anderson ML, Schachter L, O'Brien P E. Daytime sleepiness in the obese: not as simple as obstructive sleep apnea. *Obesity (Silver Spring, Md)* 2007; 15: 2504-2511.
93. Nerfeldt P, Nilsson BY, Mayor L, Udden J, Friberg D. A two-year weight reduction program in obese sleep apnea patients. *J Clin Sleep Med* 2010; 6: 479-486.
94. Sharkey KM, Orff HJ, Tosi C, Harrington D, Roye GD, Millman RP. Subjective sleepiness and daytime functioning in bariatric patients with obstructive sleep apnea. *Sleep Breath* 2013; 17: 267-274.
95. Koehler U, Buchholz C, Cassel W, Hildebrandt O, Redhardt F, Sohrabi K, Topel J, Nell C, Grimm W. Daytime sleepiness in patients with obstructive sleep apnea and severe obesity: prevalence, predictors, and therapy. *Wiener klinische Wochenschrift* 2014; 126: 619-625.
96. Valencia-Flores M, Mokhlesi B, Santiago-Ayala V, Resendiz-Garcia M, Castano-Meneses A, Meza-Vargas MS, Mendoza A, Orea-Tejeda A, Garcia-Ramos G, Aguilar-Salinas C, Bliwise DL. Intermittent hypoxemia and sleep fragmentation: associations with daytime alertness in obese sleep apnea patients living at moderate altitude. *Sleep Med* 2016; 20: 103-109.
97. Fernandez-Mendoza J, Vgontzas AN, Kritikou I, Calhoun SL, Liao D, Bixler EO. Natural history of excessive daytime sleepiness: role of obesity, weight loss, depression, and sleep propensity. *Sleep* 2015; 38: 351-360.
98. Ramachandran SK, Josephs LA. A meta-analysis of clinical screening tests for obstructive sleep apnea. *Anesthesiology* 2009; 110: 928-939.
99. Abrishami A, Khajehdehi A, Chung F. A systematic review of screening questionnaires for obstructive sleep apnea. *Canadian Journal of Anesthesia/Journal canadien d'anesthésie* 2010; 57: 423-438.
100. Nishiyama T, Mizuno T, Kojima M, Suzuki S, Kitajima T, Ando KB, Kuriyama S, Nakayama M. Criterion validity of the Pittsburgh Sleep Quality Index and Epworth Sleepiness Scale for the diagnosis of sleep disorders. *Sleep Medicine* 2014; 15: 422-429.
101. Nagappa M, Liao P, Wong J, Auckley D, Ramachandran SK, Memtsoudis S, Mokhlesi B, Chung F. Validation of the STOP-Bang Questionnaire as a Screening Tool for Obstructive Sleep Apnea among Different Populations: A Systematic Review and Meta-Analysis. *PLOS ONE* 2015; 10: e0143697.
102. Chiu H-Y, Chen P-Y, Chuang L-P, Chen N-H, Tu Y-K, Hsieh Y-J, Wang Y-C, Guilleminault C. Diagnostic accuracy of the Berlin questionnaire, STOP-BANG, STOP, and Epworth sleepiness scale in detecting obstructive sleep apnea: A bivariate meta-analysis. *Sleep Medicine Reviews* 2017; 36: 57-70.
103. Senaratna CV, Perret JL, Matheson MC, Lodge CJ, Lowe AJ, Cassim R, Russell MA, Burgess JA, Hamilton GS, Dharmage SC. Validity of the Berlin questionnaire in detecting obstructive sleep apnea: A systematic review and meta-analysis. *Sleep Medicine Reviews* 2017; 36: 116-124.
104. Pizza F, Contardi S, Mostacci B, Mondini S, Cirignotta F. A driving simulation task: correlations with Multiple Sleep Latency Test. *Brain research bulletin* 2004; 63: 423-426.
105. Contardi S, Pizza F, Sancisi E, Mondini S, Cirignotta F. Reliability of a driving simulation task for evaluation of sleepiness. *Brain research bulletin* 2004; 63: 427-431.

106. Banks S, Catcheside P, Lack LC, Grunstein RR, McEvoy RD. The Maintenance of Wakefulness Test and driving simulator performance. *Sleep* 2005; 28: 1381-1385.
107. Philip P, Sagaspe P, Taillard J, Valtat C, Moore N, Akerstedt T, Charles A, Bioulac B. Fatigue, sleepiness, and performance in simulated versus real driving conditions. *Sleep* 2005; 28: 1511-1516.
108. Hallvig D, Anund A, Fors C, Kecklund G, Karlsson JG, Wahde M, Akerstedt T. Sleepy driving on the real road and in the simulator--A comparison. *Accident; analysis and prevention* 2013; 50: 44-50.
109. Findley LJ, Fabrizio MJ, Knight H, Norcross BB, LaForte AJ, Suratt PM. Driving simulator performance in patients with sleep apnea. *The American review of respiratory disease* 1989; 140: 529-530.
110. Findley L, Unverzagt M, Guchu R, Fabrizio M, Buckner J, Suratt P. Vigilance and automobile accidents in patients with sleep apnea or narcolepsy. *Chest* 1995; 108: 619-624.
111. George CF, Boudreau AC, Smiley A. Comparison of simulated driving performance in narcolepsy and sleep apnea patients. *Sleep* 1996; 19: 711-717.
112. George CF, Boudreau AC, Smiley A. Simulated driving performance in patients with obstructive sleep apnea. *American Journal of Respiratory and Critical Care Medicine* 1996; 154: 175-181.
113. Findley LJ, Suratt PM, Dinges DF. Time-on-task decrements in "steer clear" performance of patients with sleep apnea and narcolepsy. *Sleep* 1999; 22: 804-809.
114. Juniper M, Hack MA, George CF, Davies RJ, Stradling JR. Steering simulation performance in patients with obstructive sleep apnoea and matched control subjects. *EurRespirJ* 2000; 15: 590-595.
115. Risser MR, Ware JC, Freeman FG. Driving simulation with EEG monitoring in normal and obstructive sleep apnea patients. *Sleep* 2000; 23: 393-398.
116. Hack MA, Choi SJ, Vijayapalan P, Davies RJ, Stradling JR. Comparison of the effects of sleep deprivation, alcohol and obstructive sleep apnoea (OSA) on simulated steering performance. *RespirMed* 2001; 95: 594-601.
117. Turkington PM, Sircar M, Allgar V, Elliott MW. Relationship between obstructive sleep apnoea, driving simulator performance, and risk of road traffic accidents. *Thorax* 2001; 56: 800-805.
118. Mazza S, Pepin JL, Naegele B, Plante J, Deschaux C, Levy P. Most obstructive sleep apnoea patients exhibit vigilance and attention deficits on an extended battery of tests. *European Respiratory Journal* 2005; 25: 75-80.
119. Pichel F, Zamarron C, Magan F, Rodriguez JR. Sustained attention measurements in obstructive sleep apnea and risk of traffic accidents. *Respiratory medicine* 2006; 100: 1020-1027.
120. Desai AV, Marks GB, Jankelson D, Grunstein RR. Do sleep deprivation and time of day interact with mild obstructive sleep apnea to worsen performance and neurobehavioral function? *J Clin Sleep Med* 2006; 2: 63-70.
121. Sagaspe P, Taillard J, Chaumet G, Guilleminault C, Coste O, Moore N, Bioulac B, Philip P. Maintenance of wakefulness test as a predictor of driving performance in patients with untreated obstructive sleep apnea. *Sleep* 2007; 30: 327-330.
122. Boyle LN, Tippin J, Paul A, Rizzo M. Driver Performance in the Moments Surrounding a Microsleep. *Transportation research Part F, Traffic psychology and behaviour* 2008; 11: 126-136.
123. Pizza F, Contardi S, Ferlisi M, Mondini S, Cirignotta F. Daytime driving simulation performance and sleepiness in obstructive sleep apnoea patients. *Accident; analysis and prevention* 2008; 40: 602-609.
124. Tassi P, Greneche J, Pebayle T, Eschenlauer A, Hoeft A, Bonnefond A, Rohmer O, Muzet A. Are OSAS patients impaired in their driving ability on a circuit with medium traffic density? *Accident; analysis and prevention* 2008; 40: 1365-1370.

125. WONG KKH, MARSHALL NS, GRUNSTEIN RR, DODD MJ, ROGERS NL. Comparing the neurocognitive effects of 40 h sustained wakefulness in patients with untreated OSA and healthy controls. *Journal of Sleep Research* 2008; 17: 322-330.
126. Pizza F, Contardi S, Mondini S, Trentin L, Cirignotta F. Daytime sleepiness and driving performance in patients with obstructive sleep apnea: comparison of the MSLT, the MWT, and a simulated driving task. *Sleep* 2009; 32: 382-391.
127. Tippin J, Sparks J, Rizzo M. Visual vigilance in drivers with obstructive sleep apnea. *Journal of psychosomatic research* 2009; 67: 143-151.
128. Vakulin A, Baulk SD, Catcheside PG, Antic NA, van den Heuvel CJ, Dorrian J, McEvoy RD. Effects of alcohol and sleep restriction on simulated driving performance in untreated patients with obstructive sleep apnea. *Ann Intern Med* 2009; 151: 447-455.
129. Pizza F, Contardi S, Mondini S, Cirignotta F. Simulated driving performance coupled with driver behaviour can predict the risk of sleepiness-related car accidents. *Thorax* 2011; 66: 725-726.
130. Filtiness AJ, Reyner LA, Horne JA. Moderate sleep restriction in treated older male OSA participants: greater impairment during monotonous driving compared with controls. *Sleep Med* 2011; 12: 838-843.
131. Ghosh D, Jamson SL, Baxter PD, Elliott MW. Continuous measures of driving performance on an advanced office-based driving simulator can be used to predict simulator task failure in patients with obstructive sleep apnoea syndrome. *Thorax* 2012; 67: 815-821.
132. Gieteling EW, Bakker MS, Hoekema A, Maurits NM, Brouwer WH, van der Hoeven JH. Impaired driving simulation in patients with Periodic Limb Movement Disorder and patients with Obstructive Sleep Apnea Syndrome. *Sleep Med* 2012; 13: 517-523.
133. Philip P, Chaufton C, Taillard J, Sagaspe P, Leger D, Raimondi M, Vakulin A, Capelli A. Maintenance of Wakefulness Test scores and driving performance in sleep disorder patients and controls. *Int J Psychophysiol* 2013; 89: 195-202.
134. Vakulin A, Catcheside PG, Baulk SD, Antic NA, Banks S, Dorrian J, McEvoy RD. Individual Variability and Predictors of Driving Simulator Impairment in Patients with Obstructive Sleep Apnea. *Journal of Clinical Sleep Medicine* 2014; 10: 647-655.
135. Vakulin A, D'Rozario A, Kim JW, Watson B, Cross N, Wang D, Coeytaux A, Bartlett D, Wong K, Grunstein R. Quantitative sleep EEG and polysomnographic predictors of driving simulator performance in obstructive sleep apnea. *Clinical neurophysiology : official journal of the International Federation of Clinical Neurophysiology* 2016; 127: 1428-1435.
136. May JF, Porter BE, Ware JC. The deterioration of driving performance over time in drivers with untreated sleep apnea. *Accident; analysis and prevention* 2016; 89: 95-102.
137. Schreier DR, Banks C, Mathis J. Driving simulators in the clinical assessment of fitness to drive in sleepy individuals: A systematic review. *Sleep Med Rev* 2017.
138. George CF, Boudreau AC, Smiley A. Effects of nasal CPAP on simulated driving performance in patients with obstructive sleep apnoea. *Thorax* 1997; 52: 648-653.
139. Hack M, Davies RJ, Mullins R, Choi SJ, Ramdassingh-Dow S, Jenkinson C, Stradling JR. Randomised prospective parallel trial of therapeutic versus subtherapeutic nasal continuous positive airway pressure on simulated steering performance in patients with obstructive sleep apnoea. *Thorax* 2000; 55: 224-231.
140. Kingshott RN, Vennelle M, Hoy CJ, Engleman HM, Deary IJ, Douglas NJ. Predictors of improvements in daytime function outcomes with CPAP therapy. *American Journal of Respiratory and Critical Care Medicine* 2000; 161: 866-871.
141. Munoz A, Mayoralas LR, Barbe F, Pericas J, Agusti AG. Long-term effects of CPAP on daytime functioning in patients with sleep apnoea syndrome. *European Respiratory Journal* 2000; 15: 676-681.
142. Turkington PM, Sircar M, Saralaya D, Elliott MW. Time course of changes in driving simulator performance with and without treatment in patients with sleep apnoea hypopnoea syndrome. *Thorax* 2004; 59: 56-59.



143. Orth M, Duchna HW, Leidag M, Widdig W, Rasche K, Bauer TT, Walther JW, de Zeeuw J, Malin JP, Schultze-Werninghaus G, Kotterba S. Driving simulator and neuropsychological testing in OSAS before and under CPAP therapy. *European Respiratory Journal* 2005; 26: 898-903.
144. Mazza S, Pepin JL, Naegele B, Rauch E, Deschaux C, Ficheux P, Levy P. Driving ability in sleep apnoea patients before and after CPAP treatment: evaluation on a road safety platform. *European Respiratory Journal* 2006; 28: 1020-1028.
145. Hoekema A, Stegenga B, Bakker M, Brouwer WH, de Bont LG, Wijkstra PJ, van der Hoeven JH. Simulated driving in obstructive sleep apnoea-hypopnoea; effects of oral appliances and continuous positive airway pressure. *Sleep Breath* 2007; 11: 129-138.
146. Antonopoulos CN, Sargentanis TN, Daskalopoulou SS, Petridou ET. Nasal continuous positive airway pressure (nCPAP) treatment for obstructive sleep apnea, road traffic accidents and driving simulator performance: a meta-analysis. *Sleep Med Rev* 2011; 15: 301-310.
147. Vakulin A, Baulk SD, Catcheside PG, Antic NA, van den Heuvel CJ, Dorrian J, McEvoy RD. Driving simulator performance remains impaired in patients with severe OSA after CPAP treatment. *J Clin Sleep Med* 2011; 7: 246-253.
148. Filtness AJ, Reyner LA, Horne JA. One night's CPAP withdrawal in otherwise compliant OSA patients: marked driving impairment but good awareness of increased sleepiness. *Sleep Breath* 2012; 16: 865-871.
149. Ghosh D, Jamson SL, Baxter PD, Elliott MW. Factors that affect simulated driving in patients with obstructive sleep apnoea. *ERJ open research* 2015; 1.
150. Patil SP, Ayappa IA, Caples SM, Kimoff RJ, Patel SR, Harrod CG. Treatment of Adult Obstructive Sleep Apnea With Positive Airway Pressure: An American Academy of Sleep Medicine Systematic Review, Meta-Analysis, and GRADE Assessment. *Journal of Clinical Sleep Medicine* 2019; 15: 301-334.
151. Tregear S, Reston J, Schoelles K, Phillips B. Continuous positive airway pressure reduces risk of motor vehicle crash among drivers with obstructive sleep apnea: systematic review and meta-analysis. *Sleep* 2010; 33: 1373-1380.
152. Sassani A, Findley LJ, Kryger M, Goldlust E, George C, Davidson TM. Reducing motor-vehicle collisions, costs, and fatalities by treating obstructive sleep apnea syndrome. *Sleep* 2004; 27: 453-458.
153. Engleman HM, Martin SE, Deary IJ, Douglas NJ. Effect of continuous positive airway pressure treatment on daytime function in sleep apnoea/hypopnoea syndrome. *Lancet* 1994; 343: 572-575.
154. Phillips CL, Grunstein RR, Darendeliler MA, Mihailidou AS, Srinivasan VK, Yee BJ, Marks GB, Cistulli PA. Health outcomes of continuous positive airway pressure versus oral appliance treatment for obstructive sleep apnea: a randomized controlled trial. *Am J Respir Crit Care Med* 2013; 187: 879-887.
155. Kay GG, Feldman N. Effects of armodafinil on simulated driving and self-report measures in obstructive sleep apnea patients prior to treatment with continuous positive airway pressure. *J Clin Sleep Med* 2013; 9: 445-454.
156. Walia HK, Thompson NR, Pascoe M, Faisal M, Moul DE, Katzan I, Mehra R, Foldvary-Schaefer N. Effect of Positive Airway Pressure Therapy on Drowsy Driving in a Large Clinic-Based Obstructive Sleep Apnea Cohort. *Journal of Clinical Sleep Medicine* 2019; 15: 1613-1620.
157. Cassel W, Ploch T, Becker C, Dugnus D, Peter JH, von Wichert P. Risk of traffic accidents in patients with sleep-disordered breathing: reduction with nasal CPAP. *Eur Respir J* 1996; 9: 2606-2611.
158. Krieger J, Meslier N, Lebrun T, Levy P, Phillip-Joet F, Saily J-C, Racineux J-L. Accidents in Obstructive Sleep Apnea Patients Treated With Nasal Continuous Positive Airway Pressure: A Prospective Study. *Chest* 1997; 112: 1561-1566.

159. Scharf MB, Stover R, McDannold MD, Spinner O, Berkowitz DV, Conrad C. Outcome evaluation of long-term nasal continuous positive airway pressure therapy in obstructive sleep apnea. *Am J Ther* 1999; 6: 293-297.
160. Yamamoto H, Akashiba T, Kosaka N, Ito D, Horie T. Long-term effects nasal continuous positive airway pressure on daytime sleepiness, mood and traffic accidents in patients with obstructive sleep apnoea. *Respir Med* 2000; 94: 87-90.
161. Hui DS, Ko FW, Chan JK, To KW, Fok JP, Ngai JC, Chan MC, Tung A, Chan DP, Ho CW, Lai CK. Sleep-disordered breathing and continuous positive airway pressure compliance in a group of commercial bus drivers in Hong Kong. *Respirology* 2006; 11: 723-730.
162. Barbé F, Sunyer J, de la Peña A, Pericas J, Mayoralas LR, Antó JM, Agustí AGN. Effect of Continuous Positive Airway Pressure on the Risk of Road Accidents in Sleep Apnea Patients. *Respiration* 2007; 74: 44-49.
163. Avlonitou E, Kapsimalis F, Varouchakis G, Vardavas CI, Behrakis P. Adherence to CPAP therapy improves quality of life and reduces symptoms among obstructive sleep apnea syndrome patients. *Sleep Breath* 2012; 16: 563-569.
164. Alakuijala A, Maasilta P, Bachour A. The Oxford Sleep Resistance test (OSLER) and the Multiple Unprepared Reaction Time Test (MURT) detect vigilance modifications in sleep apnea patients. *J Clin Sleep Med* 2014; 10: 1075-1082.
165. Karimi M, Hedner J, Häbel H, Nerman O, Grote L. Sleep apnea-related risk of motor vehicle accidents is reduced by continuous positive airway pressure: Swedish Traffic Accident Registry data. *Sleep* 2015; 38: 341-349.
166. Bajaj JS, Thacker LR, Leszczyszyn D, Taylor SA, Heuman DM, Raman S, Sterling RK, Siddiqui MS, Stravitz RT, Sanyal AJ, Puri P, Luketic V, Matherly S, Fuchs M, White MB, Noble NA, Unser AB, Wade JB. Effects of obstructive sleep apnea on sleep quality, cognition, and driving performance in patients with cirrhosis. *Clin Gastroenterol Hepatol* 2015; 13: 390-397 e391.
167. Burks SV, Anderson JE, Bombyk M, Haider R, Ganzhorn D, Jiao X, Lewis C, Lexvold A, Liu H, Ning J, Toll A, Hickman JS, Mabry E, Berger M, Malhotra A, Czeisler CA, Kales SN. Nonadherence with Employer-Mandated Sleep Apnea Treatment and Increased Risk of Serious Truck Crashes. *Sleep* 2016; 39: 967-975.
168. Grote L, Svedmyr S, Hedner J. Certification of fitness to drive in sleep apnea patients: Are we doing the right thing? *Journal of Sleep Research* 2018; 27: e12719.
169. Engleman HM, Martin SE, Deary IJ, Douglas NJ. Effect of CPAP therapy on daytime function in patients with mild sleep apnoea/hypopnoea syndrome. *Thorax* 1997; 52: 114-119.
170. Hakkanen H, Summala H, Partinen M, Tiihonen M, Silvo J. Blink duration as an indicator of driver sleepiness in professional bus drivers. *Sleep* 1999; 22: 798-802.
171. FINDLEY L, SMITH C, HOOPER J, DINEEN M, SURATT PM. Treatment with Nasal CPAP Decreases Automobile Accidents in Patients with Sleep Apnea. *American Journal of Respiratory and Critical Care Medicine* 2000; 161: 857-859.
172. Randerath WJ, Gerdesmeyer C, Siller K, Gil G, Sanner B, Ruhle KH. A test for the determination of sustained attention in patients with obstructive sleep apnea syndrome. *Respiration* 2000; 67: 526-532.
173. George CF. Reduction in motor vehicle collisions following treatment of sleep apnoea with nasal CPAP. *Thorax* 2001; 56: 508-512
174. Sangal RB. Evaluating sleepiness-related daytime function by querying wakefulness inability and fatigue: Sleepiness-Wakefulness Inability and Fatigue Test (SWIFT). *J Clin Sleep Med* 2012; 8: 701-711.
