# Supplementary material
Source: HighWire-hosted journal article supplement (https://erj.ersjournals.com/content/57/2/2001272)
Supplement: inline-supplementary-material-2 [file inline-supplementary-material-2.pdf]

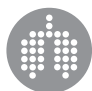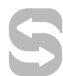

SHAREABLE PDF

# European Respiratory Society statement on sleep apnoea, sleepiness and driving risk

Maria R. Bonsignore <sup>1,2</sup>, Winfried Randerath <sup>3</sup>, Sofia Schiza<sup>4</sup>,  
Johan Verbraecken<sup>5</sup>, Mark W. Elliott<sup>6</sup>, Renata Riha <sup>7</sup>, Ferran Barbe<sup>8,9</sup>,  
Izolde Bouloukaki<sup>4</sup>, Alessandra Castrogiovanni<sup>10</sup>, Oana Deleanu<sup>11</sup>,  
Marta Goncalves<sup>12</sup>, Damien Leger<sup>13</sup>, Oreste Marrone <sup>3</sup>, Thomas Penzel <sup>14</sup>,  
Silke Ryan <sup>15</sup>, Dan Smyth<sup>16</sup>, Joaquin Teran-Santos<sup>17</sup>†, Cecilia Turino<sup>8,9</sup> and  
Walter T. McNicholas <sup>15</sup>

**Affiliations:** <sup>1</sup>PROMISE Dept, University of Palermo, Palermo, Italy. <sup>2</sup>IRIB-CNR, Palermo, Italy. <sup>3</sup>Institute of Pneumology at the University of Cologne, Clinic of Pneumology, Bethanien Hospital, Solingen, Germany. <sup>4</sup>Sleep Disorders Center, Dept of Respiratory Medicine, Medical School, University of Crete, Heraklion, Greece. <sup>5</sup>Multidisciplinary Sleep Disorders Centre, Antwerp University Hospital and University of Antwerp, Antwerp, Belgium. <sup>6</sup>Dept of Respiratory Medicine, Gledhow Wing, St James's University Hospital, Leeds, UK. <sup>7</sup>Dept of Sleep Medicine, Royal Infirmary of Edinburgh, Edinburgh, UK. <sup>8</sup>Group of Translational Research in Respiratory Medicine, Hospital Universitari Arnau de Vilanova and Santa Maria, IRBLleida, Lleida, Spain. <sup>9</sup>Centro de Investigación Biomédica en Red de Enfermedades Respiratorias (CIBERES), Madrid, Spain. <sup>10</sup>Clinic for Pneumology und Allergology, Center of Sleep Medicine and Respiratory Care, Bethanien Hospital, Solingen, Germany. <sup>11</sup>University of Medicine and Pharmacy Carol Davila, Bucharest, Romania. <sup>12</sup>EPIUnit, Instituto de Saúde Pública, Universidade do Porto, Centro de Medicina do Sono do Hospital Cuf Porto, Porto, Portugal. <sup>13</sup>Université de Paris, APHP, Hôtel Dieu, Centre du Sommeil et de la Vigilance et EA 7330 VIFASOM, Paris, France. <sup>14</sup>Sleep Medicine Center, Charité – Universitätsmedizin Berlin, Berlin, Germany. <sup>15</sup>School of Medicine, University College Dublin, Dept of Respiratory and Sleep Medicine, St Vincent's University Hospital, Dublin, Ireland. <sup>16</sup>European Lung Foundation and Sleep Disorder Support Foundation. <sup>17</sup>Unidad de Sueño, Hospital Universitario de Burgos, CIBERES, Burgos, Spain.

**Correspondence:** Walter T. McNicholas, Dept of Respiratory and Sleep Medicine, St Vincent's Hospital Group, Elm Park, Dublin 4, Ireland. E-mail: walter.mcnicolas@ucd.ie

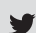

@ERSpublications

**Drivers with obstructive sleep apnoea and sleepiness are at risk of driving accidents; this is removed by effective therapy, and recent European regulations have been implemented on this topic**  
<https://bit.ly/3mXDhV1>

**Cite this article as:** Bonsignore MR, Randerath W, Schiza S, *et al.* European Respiratory Society statement on sleep apnoea, sleepiness and driving risk. *Eur Respir J* 2021; 57: 2001272 [<https://doi.org/10.1183/13993003.01272-2020>].

This single-page version can be shared freely online.

**ABSTRACT** Obstructive sleep apnoea (OSA) is highly prevalent and is a recognised risk factor for motor vehicle accidents (MVA). Effective treatment with continuous positive airway pressure has been associated with a normalisation of this increased accident risk. Thus, many jurisdictions have introduced regulations restricting the ability of OSA patients from driving until effectively treated. However, uncertainty prevails regarding the relative importance of OSA severity determined by the apnoea-hypopnoea frequency per hour and the degree of sleepiness in determining accident risk. Furthermore, the identification of subjects at risk of OSA and/or accident risk remains elusive. The introduction of official European regulations regarding fitness to drive prompted the European Respiratory Society to establish a task force to address the topic of sleep apnoea, sleepiness and driving with a view to providing an overview to clinicians involved in treating patients with the disorder. The present report evaluates the epidemiology of MVA in patients with OSA; the mechanisms involved in this association; the role of screening questionnaires, driving simulators and other

techniques to evaluate sleepiness and/or impaired vigilance; the impact of treatment on MVA risk in affected drivers; and highlights the evidence gaps regarding the identification of OSA patients at risk of MVA.
